# Supplementary material
Source: HighWire-hosted journal article supplement (doi:10.1101/rna.032680.112)
Supplement: Supp_Legends.docx [file Supp_Legends.docx]

**SUPPLEMENTAL MATERIALS**

**Supplemental Data 1.** Small RNA-seq library composition.

**Supplemental Data 2.** Small RNA-seq mature miRNA read counts.

**Supplemental Data 3.** Small RNA-seq 5p and 3p miRNA classification.
