# Supplementary material
Source: HighWire-hosted journal article supplement (doi:10.1101/rna.032680.112)
Supplement: SuppData1_SmallRNA-seqlibrarycompositioncopy.xlsx [file SuppData1_SmallRNA-seqlibrarycompositioncopy.xlsx]

## Sheet: Sheet1
SUPPLEMENTARY DATA 1 Small RNA-seq library composition
Replicate 1 (August, 2011)
	WT + mCherry	KO + mCherry	KO + hsDicer	KO + IIIA/IIIB (D1320A/D1709A)	KO + RNase IIIA (D1320A)	KO + RNase IIIB (D1709A)	KO + Helicase (K70A)	KO + PAZ (YY971AA)
Mature miRNAs	8827902	132632	6009896	99170	599396	1004236	5405994	4788331
Non-mature miRNAs (maps to precursor miRNAs)	827470	119376	715515	116763	1024053	375208	536177	657572
Non-miRNAs	3971782	6424941	4377664	9852648	6298284	5472047	5414828	8240449
Percent library composition
Mature miRNAs	0.647817	0.0198642	0.541282	0.00984945	0.0756648	0.146572	0.476006	0.349862
Non-mature miRNAs (maps to precursor miRNAs)	0.0607221	0.0178788	0.064443	0.0115968	0.129271	0.054763	0.0472112	0.0480458
Non-miRNAs	0.291461	0.962257	0.394275	0.978554	0.795064	0.798665	0.476783	0.602092
Total	1	1	1	1	1	1	1	1
Work area:
	WT + mCherry	KO + mCherry	KO + hsDicer	KO + IIIA/IIIB (D1320A/D1709A)	KO + RNase IIIA (D1320A)	KO + RNase IIIB (D1709A)	KO + Helicase (K70A)	KO + PAZ (YY971AA)
Raw Sequenced Reads	17761501	10857754	15120185	16678009	15541290	13690614	15647742	18026783
Mapped to mm9 (U01+R01)	13627154	6676949	11103075	10068581	7921733	6851491	11356999	13686352
Mapped to pre-miRNA U01	7439173	224957	5087923	208027	1472163	996563	4652891	4295331
Mapped to pre-miRNA R01	2216199	27051	1637488	7906	151286	382881	1289280	1150572
Mapped to pre-miRNA U01+R01	9655372	252008	6725411	215933	1623449	1379444	5942171	5445903
Mapped to mature miRNA (5' anchored with +/1 1bp 3' slip)	8827902	132632	6009896	99170	599396	1004236	5405994	4788331
Normalization factor for each sample*:	1	2.04093	1.22733	1.35343	1.72022	1.98893	1.19989	0.995675
*Each sample normalized to "Mapped to mm9 (U01+R01)" for WT + mCherry, Replicate 1
Replicate 2 (December, 2011)
	WT + mCherry	KO + mCherry	KO + hsDicer	KO + IIIA/IIIB (D1320A/D1709A)	KO + RNase IIIA (D1320A)	KO + RNase IIIB (D1709A)	KO + Helicase (K70A)	KO + PAZ (YY971AA)
Mapped to mature miRNA (5' anchored with +/1 1bp 3' slip; U01+R01)	8379301	39611	2959798	50741	219269	420201	3372965	1131248
Non-mature premiRNA (U01+R01)	903488	255499	406546	153254	358694	171502	388748	217022
Non-miRNA mm9 mapped (U01+R01)	7422874	11209596	11045752	12105956	7710597	4490277	6081596	7529831
Percent library composition
Mature miRNAs	0.501584	0.00344303	0.205369	0.00412195	0.0264544	0.0826845	0.342666	0.12742
Non-mature miRNAs (maps to precursor miRNAs)	0.0540827	0.0222082	0.0282087	0.0124496	0.0432758	0.0337471	0.0394936	0.0244446
Non-miRNAs	0.444333	0.974349	0.766422	0.983428	0.93027	0.883568	0.617841	0.848135
Total	1	1	1	1	1	1	1	1
Work area:
	WT + mCherry	KO + mCherry	KO + hsDicer	KO + IIIA/IIIB (D1320A/D1709A)	KO + RNase IIIA (D1320A)	KO + RNase IIIB (D1709A)	KO + Helicase (K70A)	KO + PAZ (YY971AA)
Raw Sequenced Reads	21527433	17930995	20066344	21723071	15316959	13108527	16063234	18429734
Mapped to mm9 (U01+R01)	16705663	11504706	14412096	12309951	8288560	5081980	9843309	8878101
Mapped to pre-miRNA U01	6471059	276308	2340432	184205	518435	503825	2771876	984507
Mapped to pre-miRNA R01	2811730	18802	1025912	19790	59528	87878	989837	363763
Mapped to pre-miRNA U01+R01	9282789	295110	3366344	203995	577963	591703	3761713	1348270
Mapped to mature miRNA (5' anchored with +/1 1bp 3' slip)	8379301	39611	2959798	50741	219269	420201	3372965	1131248
Normalization factor for each sample*:	0.815721	1.18449	0.945536	1.107	1.64409	2.68147	1.38441	1.53492
*Each sample normalized to "Mapped to mm9 (U01+R01)" for WT + mCherry, Replicate 1
Combined replicates	Pie chart distribution
Percent library composition	WT + mCherry	KO + mCherry	KO + hsDicer	KO + IIIA/IIIB (D1320A/D1709A)	KO + RNase IIIA (D1320A)	KO + RNase IIIB (D1709A)	KO + Helicase (K70A)	KO + PAZ (YY971AA)
Mature miRNAs	0.574701	0.0116536	0.373326	0.0069857	0.0510596	0.114628	0.409336	0.238641
Non-mature miRNAs (maps to precursor miRNAs)	0.0574024	0.0200435	0.0463258	0.0120232	0.0862736	0.044255	0.0433524	0.0362452
Non-miRNAs	0.367897	0.968303	0.580349	0.980991	0.862667	0.841117	0.547312	0.725114
Total	1	1	1	1	1	1	1	1
