# Supplementary material
Source: HighWire-hosted journal article supplement (doi:10.1101/rna.032680.112)
Supplement: SuppData2_SmallRNA-seqmaturemiRNAreadcountscopy.xlsx [file SuppData2_SmallRNA-seqmaturemiRNAreadcountscopy.xlsx]

## Sheet: All miRNAs and percentage calcs
SUPPLEMENTARY DATA 2 Small RNA-seq mature miRNA read counts
RAW READS																		NORMALIZED READS (For normalization factors, see "Normalization factors" sheet or Supplementary Table 1)																											PERCENTAGE OF WILD-TYPE hsDICER
Replicate 1									Replicate 2									Replicate 1									Replicate 2									AVERAGE									PERCENTAGE OF WILD-TYPE hsDICER (Replicate 1)
	WT	KO								WT	KO								WT	KO								WT	KO								WT	KO								WT	KO
miR	mCherry	mCherry	hsDicer	D1320A/D1709A	D1320A	D1709A	K70A	YY971AA	miR	mCherry	mCherry	hsDicer	D1320A/D1709A	D1320A	D1709A	K70A	YY971AA	miR	mCherry	mCherry	hsDicer	D1320A/D1709A	D1320A	D1709A	K70A	YY971AA	miR	mCherry	mCherry	hsDicer	D1320A/D1709A	D1320A	D1709A	K70A	YY971AA	miR	mCherry	mCherry	hsDicer	D1320A/D1709A	D1320A	D1709A	K70A	YY971AA	miR	mCherry	mCherry	hsDicer	D1320A/D1709A
mmu-miR-22	3425400	32374	1750939	21000	3657	516430	1471524	1878924	mmu-miR-22	2492304	8193	857090	7415	1772	297396	1182695	397077	mmu-miR-22	3425400	66043	2.15365e+06	28350	6290.04	1.0277e+06	1.76583e+06	1878924	mmu-miR-22	2.04369e+06	9667.74	814236	8230.65	2906.08	797021	1.63212e+06	607528	mmu-miR-22	2.73454e+06	37855.4	1.48395e+06	18290.3	4598.06	912358	1.69897e+06	1.24323e+06	mmu-miR-22	159.051	3.06655	100	1.31637
mmu-miR-21	1225052	37765	1181606	47051	87435	13665	1040599	413289	mmu-miR-21	1034310	13340	351476	26479	39916	8254	323244	66806	mmu-miR-21	1225052	77040.6	1.45338e+06	63518.9	150388	27193.3	1.24872e+06	413289	mmu-miR-21	848134	15741.2	333902	29391.7	65462.2	22120.7	446077	102213	mmu-miR-21	1.03659e+06	46390.9	893639	46455.3	107925	24657	847398	257751	mmu-miR-21	84.2901	5.30081	100	4.37044
mmu-miR-29b-1,mmu-miR-29b-2	358626	1432	634380	4731	1503	257037	371125	424824	mmu-miR-29b-1,mmu-miR-29b-2	1170867	3725	482754	3484	487	54818	472952	165955	mmu-miR-29b-1,mmu-miR-29b-2	358626	2921.28	780287	6386.85	2585.16	511504	445350	424824	mmu-miR-29b-1,mmu-miR-29b-2	960111	4395.5	458616	3867.24	798.68	146912	652674	253911	mmu-miR-29b-1,mmu-miR-29b-2	659368	3658.39	619452	5127.05	1691.92	329208	549012	339368	mmu-miR-29b-1,mmu-miR-29b-2	45.9608	0.374385	100	0.818525
mmu-let-7c-2,mmu-let-7c-1	489987	1261	295215	242	54247	1918	411328	73730	mmu-let-7c-2,mmu-let-7c-1	217184	1099	89109	733	10440	172	36883	8469	mmu-let-7c-2,mmu-let-7c-1	489987	2572.44	363114	326.7	93304.8	3816.82	493594	73730	mmu-let-7c-2,mmu-let-7c-1	178091	1296.82	84653.6	813.63	17121.6	460.96	50898.5	12957.6	mmu-let-7c-2,mmu-let-7c-1	334039	1934.63	223884	570.165	55213.2	2138.89	272246	43343.8	mmu-let-7c-2,mmu-let-7c-1	134.94	0.708438	100	0.0899716
mmu-miR-24-1,mmu-miR-24-2	159026	472	123766	99	535	88593	51043	44163	mmu-miR-24-1,mmu-miR-24-2	577259	1784	220503	2006	318	23152	202372	50751	mmu-miR-24-1,mmu-miR-24-2	159026	962.88	152232	133.65	920.2	176300	61251.6	44163	mmu-miR-24-1,mmu-miR-24-2	473352	2105.12	209478	2226.66	521.52	62047.4	279273	77649	mmu-miR-24-1,mmu-miR-24-2	316189	1534	180855	1180.16	720.86	119174	170262	60906	mmu-miR-24-1,mmu-miR-24-2	104.463	0.632508	100	0.0877935
mmu-let-7i	291624	835	188802	698	42882	583	173448	63540	mmu-let-7i	116628	409	53814	460	11949	264	49149	7920	mmu-let-7i	291624	1703.4	232226	942.3	73757	1160.17	208138	63540	mmu-let-7i	95635	482.62	51123.3	510.6	19596.4	707.52	67825.6	12117.6	mmu-let-7i	193629	1093.01	141675	726.45	46676.7	933.845	137982	37828.8	mmu-let-7i	125.577	0.733508	100	0.405768
mmu-miR-31	31071	179	95466	2346	60977	695	49369	47611	mmu-miR-31	248138	1315	115383	1017	29327	812	144426	72297	mmu-miR-31	31071	365.16	117423	3167.1	104880	1383.05	59242.8	47611	mmu-miR-31	203473	1551.7	109614	1128.87	48096.3	2176.16	199308	110614	mmu-miR-31	117272	958.43	113519	2147.99	76488.4	1779.61	129275	79112.7	mmu-miR-31	26.4607	0.310978	100	2.69717
mmu-let-7b	346171	846	132968	3718	31909	524	148551	55866	mmu-let-7b	113786	388	38101	409	8410	294	17094	3157	mmu-let-7b	346171	1725.84	163551	5019.3	54883.5	1042.76	178261	55866	mmu-let-7b	93304.5	457.84	36195.9	453.99	13792.4	787.92	23589.7	4830.21	mmu-let-7b	219738	1091.84	99873.3	2736.64	34337.9	915.34	100925	30348.1	mmu-let-7b	211.66	1.05523	100	3.06896
mmu-miR-96	39332	166	84835	168	30239	923	53637	89844	mmu-miR-96	115596	792	94738	829	9570	751	91908	37741	mmu-miR-96	39332	338.64	104347	226.8	52011.1	1836.77	64364.4	89844	mmu-miR-96	94788.7	934.56	90001.1	920.19	15694.8	2012.68	126833	57743.7	mmu-miR-96	67060.4	636.6	97174.1	573.495	33852.9	1924.72	95598.7	73793.9	mmu-miR-96	37.6934	0.324532	100	0.217352
mmu-miR-99b	171893	469	105423	107	72290	1656	293449	126896	mmu-miR-99b	117081	374	54834	617	23363	519	105496	11398	mmu-miR-99b	171893	956.76	129670	144.45	124339	3295.44	352139	126896	mmu-miR-99b	96006.4	441.32	52092.3	684.87	38315.3	1390.92	145584	17438.9	mmu-miR-99b	133950	699.04	90881.3	414.66	81327.1	2343.18	248862	72167.5	mmu-miR-99b	132.562	0.737841	100	0.111398
mmu-miR-125b-1,mmu-miR-125b-2	304611	650	114512	2177	8347	315	75084	200364	mmu-miR-125b-1,mmu-miR-125b-2	205373	623	32887	298	2424	207	44569	22022	mmu-miR-125b-1,mmu-miR-125b-2	304611	1326	140850	2938.95	14356.8	626.85	90100.8	200364	mmu-miR-125b-1,mmu-miR-125b-2	168406	735.14	31242.6	330.78	3975.36	554.76	61505.2	33693.7	mmu-miR-125b-1,mmu-miR-125b-2	236508	1030.57	86046.2	1634.87	9166.1	590.805	75803	117029	mmu-miR-125b-1,mmu-miR-125b-2	216.267	0.941429	100	2.08659
mmu-miR-26a-1,mmu-miR-26a-2	259334	637	78466	71	11375	283	88464	160653	mmu-miR-26a-1,mmu-miR-26a-2	147883	475	32131	448	5489	190	35225	22542	mmu-miR-26a-1,mmu-miR-26a-2	259334	1299.48	96513.2	95.85	19565	563.17	106157	160653	mmu-miR-26a-1,mmu-miR-26a-2	121264	560.5	30524.4	497.28	9001.96	509.2	48610.5	34489.3	mmu-miR-26a-1,mmu-miR-26a-2	190299	929.99	63518.8	296.565	14283.5	536.185	77383.6	97571.1	mmu-miR-26a-1,mmu-miR-26a-2	268.703	1.34643	100	0.0993129
mmu-let-7a-2,mmu-let-7a-1	123527	271	90748	74	6080	81	20657	26469	mmu-let-7a-2,mmu-let-7a-1	33033	177	10088	93	777	27	4964	3012	mmu-let-7a-2,mmu-let-7a-1	123527	552.84	111620	99.9	10457.6	161.19	24788.4	26469	mmu-let-7a-2,mmu-let-7a-1	27087.1	208.86	9583.6	103.23	1274.28	72.36	6850.32	4608.36	mmu-let-7a-2,mmu-let-7a-1	75307	380.85	60601.8	101.565	5865.94	116.775	15819.4	15538.7	mmu-let-7a-2,mmu-let-7a-1	110.667	0.495287	100	0.0895001
mmu-miR-183	22089	120	66296	48	7304	91	34629	38056	mmu-miR-183	12287	207	13433	41	1832	51	10176	1996	mmu-miR-183	22089	244.8	81544.1	64.8	12562.9	181.09	41554.8	38056	mmu-miR-183	10075.3	244.26	12761.3	45.51	3004.48	136.68	14042.9	3053.88	mmu-miR-183	16082.2	244.53	47152.7	55.155	7783.68	158.885	27798.8	20554.9	mmu-miR-183	27.0884	0.300206	100	0.0794662
mmu-miR-30e	74000	251	63361	43	2528	105	40988	16981	mmu-miR-30e	23982	33	7052	119	663	33	10041	7063	mmu-miR-30e	74000	512.04	77934	58.05	4348.16	208.95	49185.6	16981	mmu-miR-30e	19665.2	38.94	6699.4	132.09	1087.32	88.44	13856.6	10806.4	mmu-miR-30e	46832.6	275.49	42316.7	95.07	2717.74	148.695	31521.1	13893.7	mmu-miR-30e	94.9521	0.657017	100	0.0744861
mmu-miR-378	9703	75	60912	45	32	5151	40439	15658	mmu-miR-378	3140	8	3109	5	1	755	6117	458	mmu-miR-378	9703	153	74921.8	60.75	55.04	10250.5	48526.8	15658	mmu-miR-378	2574.8	9.44	2953.55	5.55	1.64	2023.4	8441.46	700.74	mmu-miR-378	6138.9	81.22	38937.7	33.15	28.34	6136.94	28484.1	8179.37	mmu-miR-378	12.9508	0.204213	100	0.0810846
mmu-miR-29a	45720	141	50495	41	165	5561	39434	128164	mmu-miR-29a	50044	140	13817	66	14	1615	19566	14323	mmu-miR-29a	45720	287.64	62108.8	55.35	283.8	11066.4	47320.8	128164	mmu-miR-29a	41036.1	165.2	13126.1	73.26	22.96	4328.2	27001.1	21914.2	mmu-miR-29a	43378	226.42	37617.5	64.305	153.38	7697.3	37160.9	75039.1	mmu-miR-29a	73.6127	0.463122	100	0.0891177
mmu-miR-16-1,mmu-miR-16-2	58487	126	21103	29	11930	228	27878	42093	mmu-miR-16-1,mmu-miR-16-2	138015	573	46506	687	6895	370	59322	27911	mmu-miR-16-1,mmu-miR-16-2	58487	257.04	25956.7	39.15	20519.6	453.72	33453.6	42093	mmu-miR-16-1,mmu-miR-16-2	113172	676.14	44180.7	762.57	11307.8	991.6	81864.4	42703.8	mmu-miR-16-1,mmu-miR-16-2	85829.6	466.59	35068.7	400.86	15913.7	722.66	57659	42398.4	mmu-miR-16-1,mmu-miR-16-2	225.325	0.990265	100	0.150828
mmu-let-7f-1,mmu-let-7f-2	179165	395	46796	38	11970	162	61003	7478	mmu-let-7f-1,mmu-let-7f-2	36167	131	12372	88	1938	145	7718	1958	mmu-let-7f-1,mmu-let-7f-2	179165	805.8	57559.1	51.3	20588.4	322.38	73203.6	7478	mmu-let-7f-1,mmu-let-7f-2	29656.9	154.58	11753.4	97.68	3178.32	388.6	10650.8	2995.74	mmu-let-7f-1,mmu-let-7f-2	104411	480.19	34656.2	74.49	11883.4	355.49	41927.2	5236.87	mmu-let-7f-1,mmu-let-7f-2	311.271	1.39995	100	0.0891258
mmu-miR-30d	61503	230	38965	104	6496	105	30968	70859	mmu-miR-30d	30660	138	20221	145	3237	78	18107	6001	mmu-miR-30d	61503	469.2	47926.9	140.4	11173.1	208.95	37161.6	70859	mmu-miR-30d	25141.2	162.84	19210	160.95	5308.68	209.04	24987.7	9181.53	mmu-miR-30d	43322.1	316.02	33568.4	150.675	8240.9	208.995	31074.6	40020.3	mmu-miR-30d	128.327	0.97899	100	0.292946
mmu-miR-92a-1	18511	84	38584	33	92	15246	27276	47474	mmu-miR-92a-1	28284	62	18112	55	65	2485	17999	8887	mmu-miR-92a-1	18511	171.36	47458.3	44.55	158.24	30339.5	32731.2	47474	mmu-miR-92a-1	23192.9	73.16	17206.4	61.05	106.6	6659.8	24838.6	13597.1	mmu-miR-92a-1	20851.9	122.26	32332.4	52.8	132.42	18499.7	28784.9	30535.6	mmu-miR-92a-1	39.0048	0.361075	100	0.0938718
mmu-let-7d	31402	103	42423	26	5264	342	39495	3931	mmu-let-7d	23606	93	11557	26	1267	35	7476	1322	mmu-let-7d	31402	210.12	52180.3	35.1	9054.08	680.58	47394	3931	mmu-let-7d	19356.9	109.74	10979.1	28.86	2077.88	93.8	10316.9	2022.66	mmu-let-7d	25379.5	159.93	31579.7	31.98	5565.98	387.19	28855.4	2976.83	mmu-let-7d	60.1798	0.402681	100	0.0672668
mmu-miR-30a	88237	305	43512	5094	14740	155	39453	75567	mmu-miR-30a	25971	181	9501	117	3225	50	9980	4797	mmu-miR-30a	88237	622.2	53519.8	6876.9	25352.8	308.45	47343.6	75567	mmu-miR-30a	21296.2	213.58	9025.95	129.87	5289	134	13772.4	7339.41	mmu-miR-30a	54766.6	417.89	31272.9	3503.39	15320.9	221.225	30558	41453.2	mmu-miR-30a	164.868	1.16256	100	12.8493
mmu-miR-423-3p	21189	118	41029	41	59	11206	38818	40870	mmu-miR-423-3p	20074	299	10890	85	11	2291	14885	1884	mmu-miR-423-3p	21189	240.72	50465.7	55.35	101.48	22299.9	46581.6	40870	mmu-miR-423-3p	16460.7	352.82	10345.5	94.35	18.04	6139.88	20541.3	2882.52	mmu-miR-423-3p	18824.8	296.77	30405.6	74.85	59.76	14219.9	33561.4	21876.3	mmu-miR-423-3p	41.987	0.476998	100	0.109679
mmu-miR-7a-1,mmu-miR-7a-2	14497	57	44044	31	1934	678	20681	19755	mmu-miR-7a-1,mmu-miR-7a-2	2387	18	3122	7	529	5	2271	898	mmu-miR-7a-1,mmu-miR-7a-2	14497	116.28	54174.1	41.85	3326.48	1349.22	24817.2	19755	mmu-miR-7a-1,mmu-miR-7a-2	1957.34	21.24	2965.9	7.77	867.56	13.4	3133.98	1373.94	mmu-miR-7a-1,mmu-miR-7a-2	8227.17	68.76	28570	24.81	2097.02	681.31	13975.6	10564.5	mmu-miR-7a-1,mmu-miR-7a-2	26.76	0.214641	100	0.0772509
mmu-miR-143	91935	278	38674	37	63	4209	52364	61349	mmu-miR-143	163532	360	10058	399	57	1675	15446	2385	mmu-miR-143	91935	567.12	47569	49.95	108.36	8375.91	62836.8	61349	mmu-miR-143	134096	424.8	9555.1	442.89	93.48	4489	21315.5	3649.05	mmu-miR-143	113016	495.96	28562.1	246.42	100.92	6432.45	42076.1	32499	mmu-miR-143	193.267	1.1922	100	0.105005
mmu-miR-27b	17455	77	34946	19	10	1396	2819	7224	mmu-miR-27b	58565	275	6890	109	8	747	16089	1681	mmu-miR-27b	17455	157.08	42983.6	25.65	17.2	2778.04	3382.8	7224	mmu-miR-27b	48023.3	324.5	6545.5	120.99	13.12	2001.96	22202.8	2571.93	mmu-miR-27b	32739.1	240.79	24764.5	73.32	15.16	2390	12792.8	4897.97	mmu-miR-27b	40.6085	0.365442	100	0.0596739
mmu-miR-196a-1,mmu-miR-196a-2	6851	48	31698	22	3756	298	9715	23100	mmu-miR-196a-1,mmu-miR-196a-2	18023	23	7078	15	1490	18	3831	4133	mmu-miR-196a-1,mmu-miR-196a-2	6851	97.92	38988.5	29.7	6460.32	593.02	11658	23100	mmu-miR-196a-1,mmu-miR-196a-2	14778.9	27.14	6724.1	16.65	2443.6	48.24	5286.78	6323.49	mmu-miR-196a-1,mmu-miR-196a-2	10814.9	62.53	22856.3	23.175	4451.96	320.63	8472.39	14711.7	mmu-miR-196a-1,mmu-miR-196a-2	17.5718	0.251151	100	0.0761762
mmu-miR-28-3p	44967	140	30439	18	98	9390	7787	29735	mmu-miR-28-3p	26098	23	4426	29	5	1956	4898	5006	mmu-miR-28-3p	44967	285.6	37440	24.3	168.56	18686.1	9344.4	29735	mmu-miR-28-3p	21400.4	27.14	4204.7	32.19	8.2	5242.08	6759.24	7659.18	mmu-miR-28-3p	33183.7	156.37	20822.3	28.245	88.38	11964.1	8051.82	18697.1	mmu-miR-28-3p	120.104	0.762821	100	0.0649039
mmu-let-7e	49936	119	27030	18	2996	38	12345	78	mmu-let-7e	15842	110	5190	24	753	17	3222	234	mmu-let-7e	49936	242.76	33246.9	24.3	5153.12	75.62	14814	78	mmu-let-7e	12990.4	129.8	4930.5	26.64	1234.92	45.56	4446.36	358.02	mmu-let-7e	31463.2	186.28	19088.7	25.47	3194.02	60.59	9630.18	218.01	mmu-let-7e	150.197	0.730173	100	0.0730895
mmu-miR-182	12950	61	19504	13	7278	602	24756	13662	mmu-miR-182	9203	30	8998	154	2166	61	13194	5183	mmu-miR-182	12950	124.44	23989.9	17.55	12518.2	1197.98	29707.2	13662	mmu-miR-182	7546.46	35.4	8548.1	170.94	3552.24	163.48	18207.7	7929.99	mmu-miR-182	10248.2	79.92	16269	94.245	8035.2	680.73	23957.5	10796	mmu-miR-182	53.981	0.518718	100	0.0731557
mmu-miR-193-3p	11618	30	19346	12	26	7639	5716	23731	mmu-miR-193-3p	26177	43	8747	83	14	2873	12938	9915	mmu-miR-193-3p	11618	61.2	23795.6	16.2	44.72	15201.6	6859.2	23731	mmu-miR-193-3p	21465.1	50.74	8309.65	92.13	22.96	7699.64	17854.4	15170	mmu-miR-193-3p	16541.6	55.97	16052.6	54.165	33.84	11450.6	12356.8	19450.5	mmu-miR-193-3p	48.8242	0.257191	100	0.0680799
mmu-miR-26b	26214	51	17117	17	3203	117	41380	18522	mmu-miR-26b	20172	39	10752	132	1156	39	7891	848	mmu-miR-26b	26214	104.04	21053.9	22.95	5509.16	232.83	49656	18522	mmu-miR-26b	16541	46.02	10214.4	146.52	1895.84	104.52	10889.6	1297.44	mmu-miR-26b	21377.5	75.03	15634.2	84.735	3702.5	168.675	30272.8	9909.72	mmu-miR-26b	124.509	0.49416	100	0.109006
mmu-miR-140-3p	27485	79	20079	16	22	627	11688	22134	mmu-miR-140-3p	17487	70	2906	11	2	203	6207	1287	mmu-miR-140-3p	27485	161.16	24697.2	21.6	37.84	1247.73	14025.6	22134	mmu-miR-140-3p	14339.3	82.6	2760.7	12.21	3.28	544.04	8565.66	1969.11	mmu-miR-140-3p	20912.2	121.88	13728.9	16.905	20.56	895.885	11295.6	12051.6	mmu-miR-140-3p	111.288	0.652544	100	0.0874594
mmu-miR-17	5	9	16938	16	1352	12	2759	8233	mmu-miR-17	5558	10	4097	6	735	38	7114	1707	mmu-miR-17	5	18.36	20833.7	21.6	2325.44	23.88	3310.8	8233	mmu-miR-17	4557.56	11.8	3892.15	6.66	1205.4	101.84	9817.32	2611.71	mmu-miR-17	2281.28	15.08	12362.9	14.13	1765.42	62.86	6564.06	5422.35	mmu-miR-17	0.0239995	0.0881263	100	0.103678
mmu-let-7g	12938	33	17385	18	830	30	12988	111	mmu-let-7g	11440	15	3231	9	103	12	2736	2271	mmu-let-7g	12938	67.32	21383.5	24.3	1427.6	59.7	15585.6	111	mmu-let-7g	9380.8	17.7	3069.45	9.99	168.92	32.16	3775.68	3474.63	mmu-let-7g	11159.4	42.51	12226.5	17.145	798.26	45.93	9680.64	1792.82	mmu-let-7g	60.5045	0.314821	100	0.113639
mmu-miR-199a-2-5p,mmu-miR-199a-1-5p	57518	148	13188	15	1761	247	28838	34375	mmu-miR-199a-2-5p,mmu-miR-199a-1-5p	29286	159	7930	173	1854	50	11960	4448	mmu-miR-199a-2-5p,mmu-miR-199a-1-5p	57518	301.92	16221.2	20.25	3028.92	491.53	34605.6	34375	mmu-miR-199a-2-5p,mmu-miR-199a-1-5p	24014.5	187.62	7533.5	192.03	3040.56	134	16504.8	6805.44	mmu-miR-199a-2-5p,mmu-miR-199a-1-5p	40766.3	244.77	11877.4	106.14	3034.74	312.765	25555.2	20590.2	mmu-miR-199a-2-5p,mmu-miR-199a-1-5p	354.584	1.86126	100	0.124836
mmu-miR-125a	34381	88	6020	11	949	114	43647	9910	mmu-miR-125a	57041	234	16441	128	409	220	28423	3262	mmu-miR-125a	34381	179.52	7404.6	14.85	1632.28	226.86	52376.4	9910	mmu-miR-125a	46773.6	276.12	15618.9	142.08	670.76	589.6	39223.7	4990.86	mmu-miR-125a	40577.3	227.82	11511.8	78.465	1151.52	408.23	45800.1	7450.43	mmu-miR-125a	464.319	2.42444	100	0.200551
mmu-miR-191	8896	33	16027	10	86	281	13910	552	mmu-miR-191	9963	21	3450	7	6	18	4860	482	mmu-miR-191	8896	67.32	19713.2	13.5	147.92	559.19	16692	552	mmu-miR-191	8169.66	24.78	3277.5	7.77	9.84	48.24	6706.8	737.46	mmu-miR-191	8532.83	46.05	11495.4	10.635	78.88	303.715	11699.4	644.73	mmu-miR-191	45.1271	0.341497	100	0.068482
mmu-miR-155	7019	30	16824	15	1748	30	7869	17907	mmu-miR-155	3290	3	763	2	219	4	830	521	mmu-miR-155	7019	61.2	20693.5	20.25	3006.56	59.7	9442.8	17907	mmu-miR-155	2697.8	3.54	724.85	2.22	359.16	10.72	1145.4	797.13	mmu-miR-155	4858.4	32.37	10709.2	11.235	1682.86	35.21	5294.1	9352.07	mmu-miR-155	33.9188	0.295745	100	0.0978567
mmu-miR-28-5p	14424	68	14153	12	2947	60	14769	65093	mmu-miR-28-5p	16610	24	3303	17	538	15	4654	2780	mmu-miR-28-5p	14424	138.72	17408.2	16.2	5068.84	119.4	17722.8	65093	mmu-miR-28-5p	13620.2	28.32	3137.85	18.87	882.32	40.2	6422.52	4253.4	mmu-miR-28-5p	14022.1	83.52	10273	17.535	2975.58	79.8	12072.7	34673.2	mmu-miR-28-5p	82.8576	0.796866	100	0.0930596
mmu-miR-674-5p	12888	28	14250	9	4867	14	6002	3075	mmu-miR-674-5p	7623	17	2830	53	461	11	3192	2214	mmu-miR-674-5p	12888	57.12	17527.5	12.15	8371.24	27.86	7202.4	3075	mmu-miR-674-5p	6250.86	20.06	2688.5	58.83	756.04	29.48	4404.96	3387.42	mmu-miR-674-5p	9569.43	38.59	10108	35.49	4563.64	28.67	5803.68	3231.21	mmu-miR-674-5p	73.5302	0.325888	100	0.0693196
mmu-miR-328	21646	77	12232	2614	14	240	16288	8179	mmu-miR-328	13143	69	5112	15	5	18	6685	3312	mmu-miR-328	21646	157.08	15045.4	3528.9	24.08	477.6	19545.6	8179	mmu-miR-328	10777.3	81.42	4856.4	16.65	8.2	48.24	9225.3	5067.36	mmu-miR-328	16211.6	119.25	9950.88	1772.78	16.14	262.92	14385.4	6623.18	mmu-miR-328	143.872	1.04404	100	23.4551
mmu-miR-322	32792	62	11700	12	938	17	3431	9	mmu-miR-322	30675	184	5038	14	596	33	6129	2761	mmu-miR-322	32792	126.48	14391	16.2	1613.36	33.83	4117.2	9	mmu-miR-322	25153.5	217.12	4786.1	15.54	977.44	88.44	8458.02	4224.33	mmu-miR-322	28972.8	171.8	9588.55	15.87	1295.4	61.135	6287.61	2116.66	mmu-miR-322	227.865	0.878883	100	0.11257
mmu-miR-32	919	6	8687	4	1874	21	5660	6	mmu-miR-32	34302	54	8388	127	498	37	10397	2602	mmu-miR-32	919	12.24	10685	5.4	3223.28	41.79	6792	6	mmu-miR-32	28127.6	63.72	7968.6	140.97	816.72	99.16	14347.9	3981.06	mmu-miR-32	14523.3	37.98	9326.81	73.185	2020	70.475	10569.9	1993.53	mmu-miR-32	8.60083	0.114553	100	0.0505381
mmu-miR-151-5p	40891	101	5462	3970	13635	147	34030	64101	mmu-miR-151-5p	40973	104	12360	73	2864	50	11043	5578	mmu-miR-151-5p	40891	206.04	6718.26	5359.5	23452.2	292.53	40836	64101	mmu-miR-151-5p	33597.9	122.72	11742	81.03	4696.96	134	15239.3	8534.34	mmu-miR-151-5p	37244.4	164.38	9230.13	2720.26	14074.6	213.265	28037.7	36317.7	mmu-miR-151-5p	608.655	3.06687	100	79.7751
mmu-miR-148a	52218	129	7877	12	14	1766	3760	6484	mmu-miR-148a	37524	139	7933	27	7	1154	8450	677	mmu-miR-148a	52218	263.16	9688.71	16.2	24.08	3514.34	4512	6484	mmu-miR-148a	30769.7	164.02	7536.35	29.97	11.48	3092.72	11661	1035.81	mmu-miR-148a	41493.8	213.59	8612.53	23.085	17.78	3303.53	8086.5	3759.9	mmu-miR-148a	538.957	2.71615	100	0.167205
mmu-miR-30c-1,mmu-miR-30c-2	20820	73	5918	13	1105	46	15020	15824	mmu-miR-30c-1,mmu-miR-30c-2	18585	61	8266	25	182	43	9036	2881	mmu-miR-30c-1,mmu-miR-30c-2	20820	148.92	7279.14	17.55	1900.6	91.54	18024	15824	mmu-miR-30c-1,mmu-miR-30c-2	15239.7	71.98	7852.7	27.75	298.48	115.24	12469.7	4407.93	mmu-miR-30c-1,mmu-miR-30c-2	18029.8	110.45	7565.92	22.65	1099.54	103.39	15246.8	10116	mmu-miR-30c-1,mmu-miR-30c-2	286.023	2.04585	100	0.2411
mmu-miR-423-5p	11683	42	10347	20	1855	18	716	6141	mmu-miR-423-5p	3162	117	1891	87	568	142	2002	262	mmu-miR-423-5p	11683	85.68	12726.8	27	3190.6	35.82	859.2	6141	mmu-miR-423-5p	2592.84	138.06	1796.45	96.57	931.52	380.56	2762.76	400.86	mmu-miR-423-5p	7137.92	111.87	7261.63	61.785	2061.06	208.19	1810.98	3270.93	mmu-miR-423-5p	91.7983	0.673224	100	0.212151
mmu-miR-214	8120	25	6924	2	3725	4	1	5357	mmu-miR-214	21331	20	6228	67	1997	16	4402	2604	mmu-miR-214	8120	51	8516.52	2.7	6407	7.96	1.2	5357	mmu-miR-214	17491.4	23.6	5916.6	74.37	3275.08	42.88	6074.76	3984.12	mmu-miR-214	12805.7	37.3	7216.56	38.535	4841.04	25.42	3037.98	4670.56	mmu-miR-214	95.3441	0.598836	100	0.0317031
mmu-miR-221	14224	44	6266	4	82	6483	9042	7970	mmu-miR-221	18935	67	6944	25	8	1533	10027	1903	mmu-miR-221	14224	89.76	7707.18	5.4	141.04	12901.2	10850.4	7970	mmu-miR-221	15526.7	79.06	6596.8	27.75	13.12	4108.44	13837.3	2911.59	mmu-miR-221	14875.3	84.41	7151.99	16.575	77.08	8504.81	12343.8	5440.8	mmu-miR-221	184.555	1.16463	100	0.0700645
mmu-miR-99a	580	3	2	0	6901	1	23	17	mmu-miR-99a	54619	201	15002	357	2655	100	20820	10502	mmu-miR-99a	580	6.12	2.46	0	11869.7	1.99	27.6	17	mmu-miR-99a	44787.6	237.18	14251.9	396.27	4354.2	268	28731.6	16068.1	mmu-miR-99a	22683.8	121.65	7127.18	198.135	8111.96	134.995	14379.6	8042.53	mmu-miR-99a	23577.2	248.78	100	0
mmu-miR-320	16596	44	8887	6	10	1470	12332	11028	mmu-miR-320	7116	11	3146	8	37	1077	4497	1407	mmu-miR-320	16596	89.76	10931	8.1	17.2	2925.3	14798.4	11028	mmu-miR-320	5835.12	12.98	2988.7	8.88	60.68	2886.36	6205.86	2152.71	mmu-miR-320	11215.6	51.37	6959.85	8.49	38.94	2905.83	10502.1	6590.35	mmu-miR-320	151.825	0.82115	100	0.0741011
mmu-miR-744	3339	8	8084	319	99	64	18314	25	mmu-miR-744	4798	10	2914	73	2	10	2213	145	mmu-miR-744	3339	16.32	9943.32	430.65	170.28	127.36	21976.8	25	mmu-miR-744	3934.36	11.8	2768.3	81.03	3.28	26.8	3053.94	221.85	mmu-miR-744	3636.68	14.06	6355.81	255.84	86.78	77.08	12515.4	123.425	mmu-miR-744	33.5803	0.16413	100	4.33105
mmu-miR-3068	1	2	8360	3	966	16	6780	6	mmu-miR-3068	4889	54	2534	5	913	9	1856	633	mmu-miR-3068	1	4.08	10282.8	4.05	1661.52	31.84	8136	6	mmu-miR-3068	4008.98	63.72	2407.3	5.55	1497.32	24.12	2561.28	968.49	mmu-miR-3068	2004.99	33.9	6345.05	4.8	1579.42	27.98	5348.64	487.245	mmu-miR-3068	0.00972498	0.0396779	100	0.0393862
mmu-miR-93	2	9	8591	6	719	87	26460	19	mmu-miR-93	3716	3	2168	2	44	16	4886	412	mmu-miR-93	2	18.36	10566.9	8.1	1236.68	173.13	31752	19	mmu-miR-93	3047.12	3.54	2059.6	2.22	72.16	42.88	6742.68	630.36	mmu-miR-93	1524.56	10.95	6313.27	5.16	654.42	108.005	19247.3	324.68	mmu-miR-93	0.018927	0.17375	100	0.0766542
mmu-miR-101b	2	7	9100	4	6	409	2060	3	mmu-miR-101b	2996	2	1353	0	1	633	2449	611	mmu-miR-101b	2	14.28	11193	5.4	10.32	813.91	2472	3	mmu-miR-101b	2456.72	2.36	1285.35	0	1.64	1696.44	3379.62	934.83	mmu-miR-101b	1229.36	8.32	6239.18	2.7	5.98	1255.17	2925.81	468.915	mmu-miR-101b	0.0178683	0.12758	100	0.0482444
mmu-miR-98	3790	18	8501	8	2157	16	8112	58	mmu-miR-98	1902	6	1911	7	644	6	1268	60	mmu-miR-98	3790	36.72	10456.2	10.8	3710.04	31.84	9734.4	58	mmu-miR-98	1559.64	7.08	1815.45	7.77	1056.16	16.08	1749.84	91.8	mmu-miR-98	2674.82	21.9	6135.84	9.285	2383.1	23.96	5742.12	74.9	mmu-miR-98	36.2463	0.351178	100	0.103288
mmu-miR-466h	4850	18	7152	5	223	2	1	2	mmu-miR-466h	3528	5	1642	2	261	12	2667	957	mmu-miR-466h	4850	36.72	8796.96	6.75	383.56	3.98	1.2	2	mmu-miR-466h	2892.96	5.9	1559.9	2.22	428.04	32.16	3680.46	1464.21	mmu-miR-466h	3871.48	21.31	5178.43	4.485	405.8	18.07	1840.83	733.105	mmu-miR-466h	55.1327	0.417417	100	0.0767311
mmu-miR-15b	956	6	3	4	5491	342	14135	8980	mmu-miR-15b	26358	254	10771	320	3741	172	7259	6988	mmu-miR-15b	956	12.24	3.69	5.4	9444.52	680.58	16962	8980	mmu-miR-15b	21613.6	299.72	10232.4	355.2	6135.24	460.96	10017.4	10691.6	mmu-miR-15b	11284.8	155.98	5118.07	180.3	7789.88	570.77	13489.7	9835.82	mmu-miR-15b	25907.9	331.707	100	146.341
mmu-miR-467c	0	6	6763	2	1170	1	0	0	mmu-miR-467c	4715	14	1955	3	962	13	3231	1405	mmu-miR-467c	0	12.24	8318.49	2.7	2012.4	1.99	0	0	mmu-miR-467c	3866.3	16.52	1857.25	3.33	1577.68	34.84	4458.78	2149.65	mmu-miR-467c	1933.15	14.38	5087.87	3.015	1795.04	18.415	2229.39	1074.83	mmu-miR-467c	0	0.147142	100	0.0324578
mmu-miR-532-5p	0	4	7586	3699	459	876	1	50	mmu-miR-532-5p	1049	121	593	426	237	260	1181	325	mmu-miR-532-5p	0	8.16	9330.78	4993.65	789.48	1743.24	1.2	50	mmu-miR-532-5p	860.18	142.78	563.35	472.86	388.68	696.8	1629.78	497.25	mmu-miR-532-5p	430.09	75.47	4947.07	2733.26	589.08	1220.02	815.49	273.625	mmu-miR-532-5p	0	0.0874525	100	53.518
mmu-miR-181b-1,mmu-miR-181b-2	2830	13	6415	4	406	8	3003	3	mmu-miR-181b-1,mmu-miR-181b-2	4887	90	2064	17	261	9	2533	260	mmu-miR-181b-1,mmu-miR-181b-2	2830	26.52	7890.45	5.4	698.32	15.92	3603.6	3	mmu-miR-181b-1,mmu-miR-181b-2	4007.34	106.2	1960.8	18.87	428.04	24.12	3495.54	397.8	mmu-miR-181b-1,mmu-miR-181b-2	3418.67	66.36	4925.62	12.135	563.18	20.02	3549.57	200.4	mmu-miR-181b-1,mmu-miR-181b-2	35.8661	0.336103	100	0.0684372
mmu-miR-145	2	2	7181	5	81	1	4	3	mmu-miR-145	5055	5	1038	4	0	1	784	126	mmu-miR-145	2	4.08	8832.63	6.75	139.32	1.99	4.8	3	mmu-miR-145	4145.1	5.9	986.1	4.44	0	2.68	1081.92	192.78	mmu-miR-145	2073.55	4.99	4909.36	5.595	69.66	2.335	543.36	97.89	mmu-miR-145	0.0226433	0.0461924	100	0.0764212
mmu-miR-1198-5p	235	7	6895	6	1262	6	2062	4	mmu-miR-1198-5p	1704	3	1252	5	786	2	1437	592	mmu-miR-1198-5p	235	14.28	8480.85	8.1	2170.64	11.94	2474.4	4	mmu-miR-1198-5p	1397.28	3.54	1189.4	5.55	1289.04	5.36	1983.06	905.76	mmu-miR-1198-5p	816.14	8.91	4835.12	6.825	1729.84	8.65	2228.73	454.88	mmu-miR-1198-5p	2.77095	0.168379	100	0.0955093
mmu-miR-103-1,mmu-miR-103-2	5265	22	7090	4	10	391	13404	10	mmu-miR-103-1,mmu-miR-103-2	1680	4	835	2	0	11	1513	82	mmu-miR-103-1,mmu-miR-103-2	5265	44.88	8720.7	5.4	17.2	778.09	16084.8	10	mmu-miR-103-1,mmu-miR-103-2	1377.6	4.72	793.25	2.22	0	29.48	2087.94	125.46	mmu-miR-103-1,mmu-miR-103-2	3321.3	24.8	4756.98	3.81	8.6	403.785	9086.37	67.73	mmu-miR-103-1,mmu-miR-103-2	60.3736	0.514638	100	0.0619216
mmu-miR-130a	34146	93	15	5	55	8329	11581	17	mmu-miR-130a	94637	322	9992	38	15	1883	11547	6166	mmu-miR-130a	34146	189.72	18.45	6.75	94.6	16574.7	13897.2	17	mmu-miR-130a	77602.3	379.96	9492.4	42.18	24.6	5046.44	15934.9	9433.98	mmu-miR-130a	55874.2	284.84	4755.43	24.465	59.6	10810.6	14916	4725.49	mmu-miR-130a	185073	1028.29	100	36.5854
mmu-miR-340	1021	8	7084	7	0	2	1	0	mmu-miR-340	367	4	507	89	0	0	211	1	mmu-miR-340	1021	16.32	8713.32	9.45	0	3.98	1.2	0	mmu-miR-340	300.94	4.72	481.65	98.79	0	0	291.18	1.53	mmu-miR-340	660.97	10.52	4597.48	54.12	0	1.99	146.19	0.765	mmu-miR-340	11.7177	0.187299	100	0.108455
mmu-miR-126-3p	1221	12	6730	4	6	1364	11221	7844	mmu-miR-126-3p	4781	4	946	2	0	458	1195	666	mmu-miR-126-3p	1221	24.48	8277.9	5.4	10.32	2714.36	13465.2	7844	mmu-miR-126-3p	3920.42	4.72	898.7	2.22	0	1227.44	1649.1	1018.98	mmu-miR-126-3p	2570.71	14.6	4588.3	3.81	5.16	1970.9	7557.15	4431.49	mmu-miR-126-3p	14.7501	0.295727	100	0.0652339
mmu-miR-149	9823	32	5743	7	4048	4	1	38	mmu-miR-149	1797	3	1516	0	915	10	1838	607	mmu-miR-149	9823	65.28	7063.89	9.45	6962.56	7.96	1.2	38	mmu-miR-149	1473.54	3.54	1440.2	0	1500.6	26.8	2536.44	928.71	mmu-miR-149	5648.27	34.41	4252.05	4.725	4231.58	17.38	1268.82	483.355	mmu-miR-149	139.059	0.924137	100	0.133779
mmu-miR-224	9694	25	6155	6	492	1	0	2	mmu-miR-224	1132	9	683	1	484	1	772	349	mmu-miR-224	9694	51	7570.65	8.1	846.24	1.99	0	2	mmu-miR-224	928.24	10.62	648.85	1.11	793.76	2.68	1065.36	533.97	mmu-miR-224	5311.12	30.81	4109.75	4.605	820	2.335	532.68	267.985	mmu-miR-224	128.047	0.673654	100	0.106992
mmu-miR-107	1	0	6533	0	0	0	3	0	mmu-miR-107	449	0	143	3	0	0	69	21	mmu-miR-107	1	0	8035.59	0	0	0	3.6	0	mmu-miR-107	368.18	0	135.85	3.33	0	0	95.22	32.13	mmu-miR-107	184.59	0	4085.72	1.665	0	0	49.41	16.065	mmu-miR-107	0.0124446	0	100	0
mmu-miR-25	13552	30	6	3	13	1699	17669	6008	mmu-miR-25	14743	39	7483	23	3	471	6035	2577	mmu-miR-25	13552	61.2	7.38	4.05	22.36	3381.01	21202.8	6008	mmu-miR-25	12089.3	46.02	7108.85	25.53	4.92	1262.28	8328.3	3942.81	mmu-miR-25	12820.6	53.61	3558.11	14.79	13.64	2321.64	14765.5	4975.4	mmu-miR-25	183631	829.268	100	54.878
mmu-miR-27a	6642	13681	245	4	9	1547	4350	5833	mmu-miR-27a	61347	65	7042	30	16	1175	20215	22355	mmu-miR-27a	6642	27909.2	301.35	5.4	15.48	3078.53	5220	5833	mmu-miR-27a	50304.5	76.7	6689.9	33.3	26.24	3149	27896.7	34203.2	mmu-miR-27a	28473.3	13993	3495.62	19.35	20.86	3113.77	16558.3	20018.1	mmu-miR-27a	2204.08	9261.4	100	1.79194
mmu-miR-140-5p	17059	42	9	3	2785	48	15695	15	mmu-miR-140-5p	27798	132	7219	24	3137	135	11251	3248	mmu-miR-140-5p	17059	85.68	11.07	4.05	4790.2	95.52	18834	15	mmu-miR-140-5p	22794.4	155.76	6858.05	26.64	5144.68	361.8	15526.4	4969.44	mmu-miR-140-5p	19926.7	120.72	3434.56	15.345	4967.44	228.66	17180.2	2492.22	mmu-miR-140-5p	154101	773.984	100	36.5854
mmu-miR-10b	4	15951	4979	4	1062	29	8811	7336	mmu-miR-10b	56	0	152	0	32	3	646	7	mmu-miR-10b	4	32540	6124.17	5.4	1826.64	57.71	10573.2	7336	mmu-miR-10b	45.92	0	144.4	0	52.48	8.04	891.48	10.71	mmu-miR-10b	24.96	16270	3134.28	2.7	939.56	32.875	5732.34	3673.36	mmu-miR-10b	0.065315	531.338	100	0.0881752
mmu-miR-425	0	0	74	0	1174	0	1	0	mmu-miR-425	10832	74	5291	15	1252	23	2829	450	mmu-miR-425	0	0	91.02	0	2019.28	0	1.2	0	mmu-miR-425	8882.24	87.32	5026.45	16.65	2053.28	61.64	3904.02	688.5	mmu-miR-425	4441.12	43.66	2558.74	8.325	2036.28	30.82	1952.61	344.25	mmu-miR-425	0	0	100	0
mmu-miR-1964-3p	2	2	3746	1	0	0	0	0	mmu-miR-1964-3p	1193	37	326	2	2	1	467	98	mmu-miR-1964-3p	2	4.08	4607.58	1.35	0	0	0	0	mmu-miR-1964-3p	978.26	43.66	309.7	2.22	3.28	2.68	644.46	149.94	mmu-miR-1964-3p	490.13	23.87	2458.64	1.785	1.64	1.34	322.23	74.97	mmu-miR-1964-3p	0.0434067	0.0885497	100	0.0292995
mmu-miR-23a	2286	3	1	2	1	1460	6315	6	mmu-miR-23a	15633	62	4728	14	6	133	10275	1919	mmu-miR-23a	2286	6.12	1.23	2.7	1.72	2905.4	7578	6	mmu-miR-23a	12819.1	73.16	4491.6	15.54	9.84	356.44	14179.5	2936.07	mmu-miR-23a	7552.53	39.64	2246.41	9.12	5.78	1630.92	10878.8	1471.04	mmu-miR-23a	185854	497.561	100	219.512
mmu-miR-23b	4732	19	2	1	2	1739	9	0	mmu-miR-23b	21737	134	4723	24	5	20	4012	481	mmu-miR-23b	4732	38.76	2.46	1.35	3.44	3460.61	10.8	0	mmu-miR-23b	17824.3	158.12	4486.85	26.64	8.2	53.6	5536.56	735.93	mmu-miR-23b	11278.2	98.44	2244.65	13.995	5.82	1757.11	2773.68	367.965	mmu-miR-23b	192358	1575.61	100	54.878
mmu-miR-92a-2	22	1	2212	1	7	2023	17	8939	mmu-miR-92a-2	1960	3	1316	0	7	3	4241	749	mmu-miR-92a-2	22	2.04	2720.76	1.35	12.04	4025.77	20.4	8939	mmu-miR-92a-2	1607.2	3.54	1250.2	0	11.48	8.04	5852.58	1145.97	mmu-miR-92a-2	814.6	2.79	1985.48	0.675	11.76	2016.9	2936.49	5042.48	mmu-miR-92a-2	0.808598	0.074979	100	0.0496185
mmu-miR-196b	5008	11	28	0	2527	431	5172	47	mmu-miR-196b	8963	12	3909	277	880	20	4345	514	mmu-miR-196b	5008	22.44	34.44	0	4346.44	857.69	6206.4	47	mmu-miR-196b	7349.66	14.16	3713.55	307.47	1443.2	53.6	5996.1	786.42	mmu-miR-196b	6178.83	18.3	1873.99	153.735	2894.82	455.645	6101.25	416.71	mmu-miR-196b	14541.2	65.1568	100	0
mmu-miR-139	5925	19	2	0	182	1	1	0	mmu-miR-139	1441	7	3607	6	105	6	1751	226	mmu-miR-139	5925	38.76	2.46	0	313.04	1.99	1.2	0	mmu-miR-139	1181.62	8.26	3426.65	6.66	172.2	16.08	2416.38	345.78	mmu-miR-139	3553.31	23.51	1714.55	3.33	242.62	9.035	1208.79	172.89	mmu-miR-139	240854	1575.61	100	0
mmu-miR-19b-1,mmu-miR-19b-2	0	2	1186	1	1	2372	1	0	mmu-miR-19b-1,mmu-miR-19b-2	4380	5	1941	12	1	989	4817	1092	mmu-miR-19b-1,mmu-miR-19b-2	0	4.08	1458.78	1.35	1.72	4720.28	1.2	0	mmu-miR-19b-1,mmu-miR-19b-2	3591.6	5.9	1843.95	13.32	1.64	2650.52	6647.46	1670.76	mmu-miR-19b-1,mmu-miR-19b-2	1795.8	4.99	1651.36	7.335	1.68	3685.4	3324.33	835.38	mmu-miR-19b-1,mmu-miR-19b-2	0	0.279686	100	0.0925431
mmu-miR-652	3	3	2	0	15	1231	9157	4971	mmu-miR-652	4455	14	2977	1	4	461	5919	1463	mmu-miR-652	3	6.12	2.46	0	25.8	2449.69	10988.4	4971	mmu-miR-652	3653.1	16.52	2828.15	1.11	6.56	1235.48	8168.22	2238.39	mmu-miR-652	1828.05	11.32	1415.31	0.555	16.18	1842.59	9578.31	3604.69	mmu-miR-652	121.951	248.78	100	0
mmu-miR-467a-5,mmu-miR-467a-4,mmu-miR-467a-3,mmu-miR-467a-9,mmu-miR-467a,mmu-miR-467a-8,mmu-miR-467a-2,mmu-miR-467a-7,mmu-miR-467a-10,mmu-miR-467b,mmu-miR-467a-6,mmu-miR-467a-1	0	1	0	0	2010	0	0	0	mmu-miR-467a-5,mmu-miR-467a-4,mmu-miR-467a-3,mmu-miR-467a-9,mmu-miR-467a,mmu-miR-467a-8,mmu-miR-467a-2,mmu-miR-467a-7,mmu-miR-467a-10,mmu-miR-467b,mmu-miR-467a-6,mmu-miR-467a-1	15596	96	2833	146	1733	48	7949	2781	mmu-miR-467a-5,mmu-miR-467a-4,mmu-miR-467a-3,mmu-miR-467a-9,mmu-miR-467a,mmu-miR-467a-8,mmu-miR-467a-2,mmu-miR-467a-7,mmu-miR-467a-10,mmu-miR-467b,mmu-miR-467a-6,mmu-miR-467a-1	0	2.04	0	0	3457.2	0	0	0	mmu-miR-467a-5,mmu-miR-467a-4,mmu-miR-467a-3,mmu-miR-467a-9,mmu-miR-467a,mmu-miR-467a-8,mmu-miR-467a-2,mmu-miR-467a-7,mmu-miR-467a-10,mmu-miR-467b,mmu-miR-467a-6,mmu-miR-467a-1	12788.7	113.28	2691.35	162.06	2842.12	128.64	10969.6	4254.93	mmu-miR-467a-5,mmu-miR-467a-4,mmu-miR-467a-3,mmu-miR-467a-9,mmu-miR-467a,mmu-miR-467a-8,mmu-miR-467a-2,mmu-miR-467a-7,mmu-miR-467a-10,mmu-miR-467b,mmu-miR-467a-6,mmu-miR-467a-1	6394.36	57.66	1345.67	81.03	3149.66	64.32	5484.81	2127.47	mmu-miR-467a-5,mmu-miR-467a-4,mmu-miR-467a-3,mmu-miR-467a-9,mmu-miR-467a,mmu-miR-467a-8,mmu-miR-467a-2,mmu-miR-467a-7,mmu-miR-467a-10,mmu-miR-467b,mmu-miR-467a-6,mmu-miR-467a-1	#DIV/0!	#DIV/0!	#DIV/0!	#DIV/0!
mmu-miR-199a-1-3p,mmu-miR-199b,mmu-miR-199a-2-3p	40190	76	34	10	26	1178	17772	24156	mmu-miR-199a-1-3p,mmu-miR-199b,mmu-miR-199a-2-3p	11464	16	2696	13	3	324	4054	2945	mmu-miR-199a-1-3p,mmu-miR-199b,mmu-miR-199a-2-3p	40190	155.04	41.82	13.5	44.72	2344.22	21326.4	24156	mmu-miR-199a-1-3p,mmu-miR-199b,mmu-miR-199a-2-3p	9400.48	18.88	2561.2	14.43	4.92	868.32	5594.52	4505.85	mmu-miR-199a-1-3p,mmu-miR-199b,mmu-miR-199a-2-3p	24795.2	86.96	1301.51	13.965	24.82	1606.27	13460.5	14330.9	mmu-miR-199a-1-3p,mmu-miR-199b,mmu-miR-199a-2-3p	96102.3	370.732	100	32.2812
mmu-miR-669a-2-3p,mmu-miR-669a-13-3p,mmu-miR-669a-8-3p,mmu-miR-669a-7-3p,mmu-miR-669a-5-3p,mmu-miR-669a-9-3p,mmu-miR-669a-4-3p,mmu-miR-669a-6-3p,mmu-miR-669a-12-3p,mmu-miR-669a-10-3p,mmu-miR-669a-3-3p,mmu-miR-669o-3p,mmu-miR-669a-11-3p	0	0	0	0	0	463	0	0	mmu-miR-669a-2-3p,mmu-miR-669a-13-3p,mmu-miR-669a-8-3p,mmu-miR-669a-7-3p,mmu-miR-669a-5-3p,mmu-miR-669a-9-3p,mmu-miR-669a-4-3p,mmu-miR-669a-6-3p,mmu-miR-669a-12-3p,mmu-miR-669a-10-3p,mmu-miR-669a-3-3p,mmu-miR-669o-3p,mmu-miR-669a-11-3p	5027	10	2641	9	2	420	3838	1086	mmu-miR-669a-2-3p,mmu-miR-669a-13-3p,mmu-miR-669a-8-3p,mmu-miR-669a-7-3p,mmu-miR-669a-5-3p,mmu-miR-669a-9-3p,mmu-miR-669a-4-3p,mmu-miR-669a-6-3p,mmu-miR-669a-12-3p,mmu-miR-669a-10-3p,mmu-miR-669a-3-3p,mmu-miR-669o-3p,mmu-miR-669a-11-3p	0	0	0	0	0	921.37	0	0	mmu-miR-669a-2-3p,mmu-miR-669a-13-3p,mmu-miR-669a-8-3p,mmu-miR-669a-7-3p,mmu-miR-669a-5-3p,mmu-miR-669a-9-3p,mmu-miR-669a-4-3p,mmu-miR-669a-6-3p,mmu-miR-669a-12-3p,mmu-miR-669a-10-3p,mmu-miR-669a-3-3p,mmu-miR-669o-3p,mmu-miR-669a-11-3p	4122.14	11.8	2508.95	9.99	3.28	1125.6	5296.44	1661.58	mmu-miR-669a-2-3p,mmu-miR-669a-13-3p,mmu-miR-669a-8-3p,mmu-miR-669a-7-3p,mmu-miR-669a-5-3p,mmu-miR-669a-9-3p,mmu-miR-669a-4-3p,mmu-miR-669a-6-3p,mmu-miR-669a-12-3p,mmu-miR-669a-10-3p,mmu-miR-669a-3-3p,mmu-miR-669o-3p,mmu-miR-669a-11-3p	2061.07	5.9	1254.47	4.995	1.64	1023.49	2648.22	830.79	mmu-miR-669a-2-3p,mmu-miR-669a-13-3p,mmu-miR-669a-8-3p,mmu-miR-669a-7-3p,mmu-miR-669a-5-3p,mmu-miR-669a-9-3p,mmu-miR-669a-4-3p,mmu-miR-669a-6-3p,mmu-miR-669a-12-3p,mmu-miR-669a-10-3p,mmu-miR-669a-3-3p,mmu-miR-669o-3p,mmu-miR-669a-11-3p	#DIV/0!	#DIV/0!	#DIV/0!	#DIV/0!
mmu-miR-497	7486	7	3	1	598	11	2796	4	mmu-miR-497	8860	12	2616	8	2888	12	2252	1503	mmu-miR-497	7486	14.28	3.69	1.35	1028.56	21.89	3355.2	4	mmu-miR-497	7265.2	14.16	2485.2	8.88	4736.32	32.16	3107.76	2299.59	mmu-miR-497	7375.6	14.22	1244.44	5.115	2882.44	27.025	3231.48	1151.8	mmu-miR-497	202873	386.992	100	36.5854
mmu-miR-15a	5069	7	3	11	1977	11	3455	6635	mmu-miR-15a	10882	20	2574	10	701	132	3741	147	mmu-miR-15a	5069	14.28	3.69	14.85	3400.44	21.89	4146	6635	mmu-miR-15a	8923.24	23.6	2445.3	11.1	1149.64	353.76	5162.58	224.91	mmu-miR-15a	6996.12	18.94	1224.49	12.975	2275.04	187.825	4654.29	3429.95	mmu-miR-15a	137371	386.992	100	402.439
mmu-miR-193b	0	0	0	0	0	889	0	0	mmu-miR-193b	5275	35	2467	5	2	126	2029	953	mmu-miR-193b	0	0	0	0	0	1769.11	0	0	mmu-miR-193b	4325.5	41.3	2343.65	5.55	3.28	337.68	2800.02	1458.09	mmu-miR-193b	2162.75	20.65	1171.83	2.775	1.64	1053.39	1400.01	729.045	mmu-miR-193b	#DIV/0!	#DIV/0!	#DIV/0!	#DIV/0!
mmu-miR-20a	0	0	9	0	1406	0	1	10	mmu-miR-20a	4530	64	2351	6	588	8	5575	1471	mmu-miR-20a	0	0	11.07	0	2418.32	0	1.2	10	mmu-miR-20a	3714.6	75.52	2233.45	6.66	964.32	21.44	7693.5	2250.63	mmu-miR-20a	1857.3	37.76	1122.26	3.33	1691.32	10.72	3847.35	1130.32	mmu-miR-20a	0	0	100	0
mmu-miR-30b	1	0	0	0	855	0	0	0	mmu-miR-30b	5116	6	2128	6	358	157	4313	1895	mmu-miR-30b	1	0	0	0	1470.6	0	0	0	mmu-miR-30b	4195.12	7.08	2021.6	6.66	587.12	420.76	5951.94	2899.35	mmu-miR-30b	2098.06	3.54	1010.8	3.33	1028.86	210.38	2975.97	1449.67	mmu-miR-30b	#DIV/0!	#DIV/0!	#DIV/0!	#DIV/0!
mmu-miR-181a-2,mmu-miR-181a-1	18195	20919	21	1	1220	160	3017	2	mmu-miR-181a-2,mmu-miR-181a-1	7216	47	2081	80	615	17	2936	686	mmu-miR-181a-2,mmu-miR-181a-1	18195	42674.8	25.83	1.35	2098.4	318.4	3620.4	2	mmu-miR-181a-2,mmu-miR-181a-1	5917.12	55.46	1976.95	88.8	1008.6	45.56	4051.68	1049.58	mmu-miR-181a-2,mmu-miR-181a-1	12056.1	21365.1	1001.39	45.075	1553.5	181.98	3836.04	525.79	mmu-miR-181a-2,mmu-miR-181a-1	70441.3	165214	100	5.22648
mmu-miR-106b	4385	12	3	4	2017	21	5602	6605	mmu-miR-106b	5322	53	2012	179	751	16	2697	753	mmu-miR-106b	4385	24.48	3.69	5.4	3469.24	41.79	6722.4	6605	mmu-miR-106b	4364.04	62.54	1911.4	198.69	1231.64	42.88	3721.86	1152.09	mmu-miR-106b	4374.52	43.51	957.545	102.045	2350.44	42.335	5222.13	3878.55	mmu-miR-106b	118835	663.415	100	146.341
mmu-miR-342	0	0	0	0	1	589	0	0	mmu-miR-342	3052	12	1999	4	1	2	975	523	mmu-miR-342	0	0	0	0	1.72	1172.11	0	0	mmu-miR-342	2502.64	14.16	1899.05	4.44	1.64	5.36	1345.5	800.19	mmu-miR-342	1251.32	7.08	949.525	2.22	1.68	588.735	672.75	400.095	mmu-miR-342	#DIV/0!	#DIV/0!	#DIV/0!	#DIV/0!
mmu-miR-195	2	0	8	0	107	0	0	6	mmu-miR-195	8294	13	1917	4	773	8	1683	1920	mmu-miR-195	2	0	9.84	0	184.04	0	0	6	mmu-miR-195	6801.08	15.34	1821.15	4.44	1267.72	21.44	2322.54	2937.6	mmu-miR-195	3401.54	7.67	915.495	2.22	725.88	10.72	1161.27	1471.8	mmu-miR-195	20.3252	0	100	0
mmu-miR-222	1	0	4	0	0	200	2	0	mmu-miR-222	9969	15	1918	71	2	14	2959	475	mmu-miR-222	1	0	4.92	0	0	398	2.4	0	mmu-miR-222	8174.58	17.7	1822.1	78.81	3.28	37.52	4083.42	726.75	mmu-miR-222	4087.79	8.85	913.51	39.405	1.64	217.76	2042.91	363.375	mmu-miR-222	20.3252	0	100	0
mmu-miR-324	0	1	0	0	487	3	1676	1	mmu-miR-324	5312	8	1851	4	122	19	4647	51	mmu-miR-324	0	2.04	0	0	837.64	5.97	2011.2	1	mmu-miR-324	4355.84	9.44	1758.45	4.44	200.08	50.92	6412.86	78.03	mmu-miR-324	2177.92	5.74	879.225	2.22	518.86	28.445	4212.03	39.515	mmu-miR-324	#DIV/0!	#DIV/0!	#DIV/0!	#DIV/0!
mmu-miR-151-3p	3349	8	11	2	79	413	13691	11133	mmu-miR-151-3p	6123	3	1807	6	1	13	3051	1039	mmu-miR-151-3p	3349	16.32	13.53	2.7	135.88	821.87	16429.2	11133	mmu-miR-151-3p	5020.86	3.54	1716.65	6.66	1.64	34.84	4210.38	1589.67	mmu-miR-151-3p	4184.93	9.93	865.09	4.68	68.76	428.355	10319.8	6361.34	mmu-miR-151-3p	24752.4	120.621	100	19.9557
mmu-miR-872	24167	39	13	2	82	14	6423	8	mmu-miR-872	11911	48	1740	95	63	19	2755	517	mmu-miR-872	24167	79.56	15.99	2.7	141.04	27.86	7707.6	8	mmu-miR-872	9767.02	56.64	1653	105.45	103.32	50.92	3801.9	791.01	mmu-miR-872	16967	68.1	834.495	54.075	122.18	39.39	5754.75	399.505	mmu-miR-872	151138	497.561	100	16.8856
mmu-miR-669a-13-5p,mmu-miR-669a-12-5p,mmu-miR-669a-4-5p,mmu-miR-669p-2,mmu-miR-669a-11-5p,mmu-miR-669p-1,mmu-miR-669a-7-5p,mmu-miR-669a-9-5p,mmu-miR-669a-8-5p,mmu-miR-669a-10-5p,mmu-miR-669a-2-5p,mmu-miR-669a-6-5p,mmu-miR-669a-1-5p,mmu-miR-669a-3-5p,mmu-miR-669a-5-5p	0	0	0	0	1428	11	3616	3	mmu-miR-669a-13-5p,mmu-miR-669a-12-5p,mmu-miR-669a-4-5p,mmu-miR-669p-2,mmu-miR-669a-11-5p,mmu-miR-669p-1,mmu-miR-669a-7-5p,mmu-miR-669a-9-5p,mmu-miR-669a-8-5p,mmu-miR-669a-10-5p,mmu-miR-669a-2-5p,mmu-miR-669a-6-5p,mmu-miR-669a-1-5p,mmu-miR-669a-3-5p,mmu-miR-669a-5-5p	3430	41	1741	66	1234	8	1571	2295	mmu-miR-669a-13-5p,mmu-miR-669a-12-5p,mmu-miR-669a-4-5p,mmu-miR-669p-2,mmu-miR-669a-11-5p,mmu-miR-669p-1,mmu-miR-669a-7-5p,mmu-miR-669a-9-5p,mmu-miR-669a-8-5p,mmu-miR-669a-10-5p,mmu-miR-669a-2-5p,mmu-miR-669a-6-5p,mmu-miR-669a-1-5p,mmu-miR-669a-3-5p,mmu-miR-669a-5-5p	0	0	0	0	2456.16	21.89	4339.2	3	mmu-miR-669a-13-5p,mmu-miR-669a-12-5p,mmu-miR-669a-4-5p,mmu-miR-669p-2,mmu-miR-669a-11-5p,mmu-miR-669p-1,mmu-miR-669a-7-5p,mmu-miR-669a-9-5p,mmu-miR-669a-8-5p,mmu-miR-669a-10-5p,mmu-miR-669a-2-5p,mmu-miR-669a-6-5p,mmu-miR-669a-1-5p,mmu-miR-669a-3-5p,mmu-miR-669a-5-5p	2812.6	48.38	1653.95	73.26	2023.76	21.44	2167.98	3511.35	mmu-miR-669a-13-5p,mmu-miR-669a-12-5p,mmu-miR-669a-4-5p,mmu-miR-669p-2,mmu-miR-669a-11-5p,mmu-miR-669p-1,mmu-miR-669a-7-5p,mmu-miR-669a-9-5p,mmu-miR-669a-8-5p,mmu-miR-669a-10-5p,mmu-miR-669a-2-5p,mmu-miR-669a-6-5p,mmu-miR-669a-1-5p,mmu-miR-669a-3-5p,mmu-miR-669a-5-5p	1406.3	24.19	826.975	36.63	2239.96	21.665	3253.59	1757.17	mmu-miR-669a-13-5p,mmu-miR-669a-12-5p,mmu-miR-669a-4-5p,mmu-miR-669p-2,mmu-miR-669a-11-5p,mmu-miR-669p-1,mmu-miR-669a-7-5p,mmu-miR-669a-9-5p,mmu-miR-669a-8-5p,mmu-miR-669a-10-5p,mmu-miR-669a-2-5p,mmu-miR-669a-6-5p,mmu-miR-669a-1-5p,mmu-miR-669a-3-5p,mmu-miR-669a-5-5p	#DIV/0!	#DIV/0!	#DIV/0!	#DIV/0!
mmu-miR-100	21914	50	419	4	994	30	9051	7515	mmu-miR-100	7147	59	951	5	161	3	1171	469	mmu-miR-100	21914	102	515.37	5.4	1709.68	59.7	10861.2	7515	mmu-miR-100	5860.54	69.62	903.45	5.55	264.04	8.04	1615.98	717.57	mmu-miR-100	13887.3	85.81	709.41	5.475	986.86	33.87	6238.59	4116.28	mmu-miR-100	4252.09	19.7916	100	1.04779
mmu-miR-186	8546	23	9	6	590	40	10565	22130	mmu-miR-186	2539	7	1465	2	279	16	3074	1111	mmu-miR-186	8546	46.92	11.07	8.1	1014.8	79.6	12678	22130	mmu-miR-186	2081.98	8.26	1391.75	2.22	457.56	42.88	4242.12	1699.83	mmu-miR-186	5313.99	27.59	701.41	5.16	736.18	61.24	8460.06	11914.9	mmu-miR-186	77199.6	423.848	100	73.1707
mmu-miR-297a-5-5p,mmu-miR-297a-4-5p,mmu-miR-297a-3-5p	0	0	0	0	495	0	0	0	mmu-miR-297a-5-5p,mmu-miR-297a-4-5p,mmu-miR-297a-3-5p	1989	14	1428	3	262	10	2280	417	mmu-miR-297a-5-5p,mmu-miR-297a-4-5p,mmu-miR-297a-3-5p	0	0	0	0	851.4	0	0	0	mmu-miR-297a-5-5p,mmu-miR-297a-4-5p,mmu-miR-297a-3-5p	1630.98	16.52	1356.6	3.33	429.68	26.8	3146.4	638.01	mmu-miR-297a-5-5p,mmu-miR-297a-4-5p,mmu-miR-297a-3-5p	815.49	8.26	678.3	1.665	640.54	13.4	1573.2	319.005	mmu-miR-297a-5-5p,mmu-miR-297a-4-5p,mmu-miR-297a-3-5p	#DIV/0!	#DIV/0!	#DIV/0!	#DIV/0!
mmu-miR-669m-2,mmu-miR-669b,mmu-miR-669m-1	1	0	0	1	321	12	4530	4	mmu-miR-669m-2,mmu-miR-669b,mmu-miR-669m-1	3772	4	1338	2	288	1	851	1208	mmu-miR-669m-2,mmu-miR-669b,mmu-miR-669m-1	1	0	0	1.35	552.12	23.88	5436	4	mmu-miR-669m-2,mmu-miR-669b,mmu-miR-669m-1	3093.04	4.72	1271.1	2.22	472.32	2.68	1174.38	1848.24	mmu-miR-669m-2,mmu-miR-669b,mmu-miR-669m-1	1547.02	2.36	635.55	1.785	512.22	13.28	3305.19	926.12	mmu-miR-669m-2,mmu-miR-669b,mmu-miR-669m-1	#DIV/0!	#DIV/0!	#DIV/0!	#DIV/0!
mmu-miR-669f-3p	0	0	0	0	1	534	0	0	mmu-miR-669f-3p	2593	52	1320	3	0	295	1155	145	mmu-miR-669f-3p	0	0	0	0	1.72	1062.66	0	0	mmu-miR-669f-3p	2126.26	61.36	1254	3.33	0	790.6	1593.9	221.85	mmu-miR-669f-3p	1063.13	30.68	627	1.665	0.86	926.63	796.95	110.925	mmu-miR-669f-3p	#DIV/0!	#DIV/0!	#DIV/0!	#DIV/0!
mmu-miR-374	0	1	0	0	1328	0	0	0	mmu-miR-374	4350	4	1289	5	385	49	2405	56	mmu-miR-374	0	2.04	0	0	2284.16	0	0	0	mmu-miR-374	3567	4.72	1224.55	5.55	631.4	131.32	3318.9	85.68	mmu-miR-374	1783.5	3.38	612.275	2.775	1457.78	65.66	1659.45	42.84	mmu-miR-374	#DIV/0!	#DIV/0!	#DIV/0!	#DIV/0!
mmu-miR-18a	0	0	174	1	1253	21	8948	7	mmu-miR-18a	2019	3	1004	64	159	14	2499	802	mmu-miR-18a	0	0	214.02	1.35	2155.16	41.79	10737.6	7	mmu-miR-18a	1655.58	3.54	953.8	71.04	260.76	37.52	3448.62	1227.06	mmu-miR-18a	827.79	1.77	583.91	36.195	1207.96	39.655	7093.11	617.03	mmu-miR-18a	0	0	100	0.630782
mmu-miR-185	6631	14	3	1	920	0	1	1	mmu-miR-185	3478	5	1201	9	405	11	1857	126	mmu-miR-185	6631	28.56	3.69	1.35	1582.4	0	1.2	1	mmu-miR-185	2851.96	5.9	1140.95	9.99	664.2	29.48	2562.66	192.78	mmu-miR-185	4741.48	17.23	572.32	5.67	1123.3	14.74	1281.93	96.89	mmu-miR-185	179702	773.984	100	36.5854
mmu-miR-365-1,mmu-miR-365-2	1	0	0	0	3	1849	0	1	mmu-miR-365-1,mmu-miR-365-2	1683	1	1190	0	0	137	1785	456	mmu-miR-365-1,mmu-miR-365-2	1	0	0	0	5.16	3679.51	0	1	mmu-miR-365-1,mmu-miR-365-2	1380.06	1.18	1130.5	0	0	367.16	2463.3	697.68	mmu-miR-365-1,mmu-miR-365-2	690.53	0.59	565.25	0	2.58	2023.33	1231.65	349.34	mmu-miR-365-1,mmu-miR-365-2	#DIV/0!	#DIV/0!	#DIV/0!	#DIV/0!
mmu-miR-33	20	1	1	0	1789	2	5	3908	mmu-miR-33	17355	65	1002	2	599	10	1665	3128	mmu-miR-33	20	2.04	1.23	0	3077.08	3.98	6	3908	mmu-miR-33	14231.1	76.7	951.9	2.22	982.36	26.8	2297.7	4785.84	mmu-miR-33	7125.55	39.37	476.565	1.11	2029.72	15.39	1151.85	4346.92	mmu-miR-33	1626.02	165.854	100	0
mmu-miR-206	4	6	3	2	18	4320	10988	18037	mmu-miR-206	2799	6	845	103	2	276	1106	1236	mmu-miR-206	4	12.24	3.69	2.7	30.96	8596.8	13185.6	18037	mmu-miR-206	2295.18	7.08	802.75	114.33	3.28	739.68	1526.28	1891.08	mmu-miR-206	1149.59	9.66	403.22	58.515	17.12	4668.24	7355.94	9964.04	mmu-miR-206	108.401	331.707	100	73.1707
mmu-miR-361	1	0	0	0	835	10	3503	4	mmu-miR-361	1777	2	813	4	103	6	761	640	mmu-miR-361	1	0	0	0	1436.2	19.9	4203.6	4	mmu-miR-361	1457.14	2.36	772.35	4.44	168.92	16.08	1050.18	979.2	mmu-miR-361	729.07	1.18	386.175	2.22	802.56	17.99	2626.89	491.6	mmu-miR-361	#DIV/0!	#DIV/0!	#DIV/0!	#DIV/0!
mmu-miR-148b	9023	21	4	0	1	1611	6	11	mmu-miR-148b	1084	8	788	1	0	355	1320	488	mmu-miR-148b	9023	42.84	4.92	0	1.72	3205.89	7.2	11	mmu-miR-148b	888.88	9.44	748.6	1.11	0	951.4	1821.6	746.64	mmu-miR-148b	4955.94	26.14	376.76	0.555	0.86	2078.64	914.4	378.82	mmu-miR-148b	183394	870.732	100	0
mmu-miR-674-3p	0	0	1	0	2	994	0	0	mmu-miR-674-3p	3564	1	756	1	0	281	927	565	mmu-miR-674-3p	0	0	1.23	0	3.44	1978.06	0	0	mmu-miR-674-3p	2922.48	1.18	718.2	1.11	0	753.08	1279.26	864.45	mmu-miR-674-3p	1461.24	0.59	359.715	0.555	1.72	1365.57	639.63	432.225	mmu-miR-674-3p	0	0	100	0
mmu-miR-466d-3p	0	0	0	0	0	0	0	0	mmu-miR-466d-3p	1922	3	710	1	0	114	243	325	mmu-miR-466d-3p	0	0	0	0	0	0	0	0	mmu-miR-466d-3p	1576.04	3.54	674.5	1.11	0	305.52	335.34	497.25	mmu-miR-466d-3p	788.02	1.77	337.25	0.555	0	152.76	167.67	248.625	mmu-miR-466d-3p	#DIV/0!	#DIV/0!	#DIV/0!	#DIV/0!
mmu-miR-500	3966	11	2	1	6	159	5	6729	mmu-miR-500	2650	4	671	2	0	334	986	1007	mmu-miR-500	3966	22.44	2.46	1.35	10.32	316.41	6	6729	mmu-miR-500	2173	4.72	637.45	2.22	0	895.12	1360.68	1540.71	mmu-miR-500	3069.5	13.58	319.955	1.785	5.16	605.765	683.34	4134.85	mmu-miR-500	161220	912.195	100	54.878
mmu-miR-466c-2-3p,mmu-miR-466b-6-3p,mmu-miR-466b-7-3p,mmu-miR-466b-9-3p,mmu-miR-466b-8-3p,mmu-miR-466b-2-3p,mmu-miR-466e-3p,mmu-miR-466b-3-3p,mmu-miR-466a-3p,mmu-miR-466b-4-3p,mmu-miR-466c-1-3p,mmu-miR-466p-3p,mmu-miR-466b-1-3p,mmu-miR-466c-3p,mmu-miR-466b-5-3p	12	1	0	0	0	221	0	0	mmu-miR-466c-2-3p,mmu-miR-466b-6-3p,mmu-miR-466b-7-3p,mmu-miR-466b-9-3p,mmu-miR-466b-8-3p,mmu-miR-466b-2-3p,mmu-miR-466e-3p,mmu-miR-466b-3-3p,mmu-miR-466a-3p,mmu-miR-466b-4-3p,mmu-miR-466c-1-3p,mmu-miR-466p-3p,mmu-miR-466b-1-3p,mmu-miR-466c-3p,mmu-miR-466b-5-3p	1340	2	672	1	0	30	228	222	mmu-miR-466c-2-3p,mmu-miR-466b-6-3p,mmu-miR-466b-7-3p,mmu-miR-466b-9-3p,mmu-miR-466b-8-3p,mmu-miR-466b-2-3p,mmu-miR-466e-3p,mmu-miR-466b-3-3p,mmu-miR-466a-3p,mmu-miR-466b-4-3p,mmu-miR-466c-1-3p,mmu-miR-466p-3p,mmu-miR-466b-1-3p,mmu-miR-466c-3p,mmu-miR-466b-5-3p	12	2.04	0	0	0	439.79	0	0	mmu-miR-466c-2-3p,mmu-miR-466b-6-3p,mmu-miR-466b-7-3p,mmu-miR-466b-9-3p,mmu-miR-466b-8-3p,mmu-miR-466b-2-3p,mmu-miR-466e-3p,mmu-miR-466b-3-3p,mmu-miR-466a-3p,mmu-miR-466b-4-3p,mmu-miR-466c-1-3p,mmu-miR-466p-3p,mmu-miR-466b-1-3p,mmu-miR-466c-3p,mmu-miR-466b-5-3p	1098.8	2.36	638.4	1.11	0	80.4	314.64	339.66	mmu-miR-466c-2-3p,mmu-miR-466b-6-3p,mmu-miR-466b-7-3p,mmu-miR-466b-9-3p,mmu-miR-466b-8-3p,mmu-miR-466b-2-3p,mmu-miR-466e-3p,mmu-miR-466b-3-3p,mmu-miR-466a-3p,mmu-miR-466b-4-3p,mmu-miR-466c-1-3p,mmu-miR-466p-3p,mmu-miR-466b-1-3p,mmu-miR-466c-3p,mmu-miR-466b-5-3p	555.4	2.2	319.2	0.555	0	260.095	157.32	169.83	mmu-miR-466c-2-3p,mmu-miR-466b-6-3p,mmu-miR-466b-7-3p,mmu-miR-466b-9-3p,mmu-miR-466b-8-3p,mmu-miR-466b-2-3p,mmu-miR-466e-3p,mmu-miR-466b-3-3p,mmu-miR-466a-3p,mmu-miR-466b-4-3p,mmu-miR-466c-1-3p,mmu-miR-466p-3p,mmu-miR-466b-1-3p,mmu-miR-466c-3p,mmu-miR-466b-5-3p	#DIV/0!	#DIV/0!	#DIV/0!	#DIV/0!
mmu-miR-615	13255	31	6	1	0	0	8	0	mmu-miR-615	6258	5	636	1	1	8	1465	208	mmu-miR-615	13255	63.24	7.38	1.35	0	0	9.6	0	mmu-miR-615	5131.56	5.9	604.2	1.11	1.64	21.44	2021.7	318.24	mmu-miR-615	9193.28	34.57	305.79	1.23	0.82	10.72	1015.65	159.12	mmu-miR-615	179607	856.911	100	18.2927
mmu-miR-19a	0	1	0	0	3	1205	0	0	mmu-miR-19a	1161	3	641	0	5	423	1357	224	mmu-miR-19a	0	2.04	0	0	5.16	2397.95	0	0	mmu-miR-19a	952.02	3.54	608.95	0	8.2	1133.64	1872.66	342.72	mmu-miR-19a	476.01	2.79	304.475	0	6.68	1765.8	936.33	171.36	mmu-miR-19a	#DIV/0!	#DIV/0!	#DIV/0!	#DIV/0!
mmu-miR-34a	0	0	0	0	304	2	680	1	mmu-miR-34a	2898	14	625	6	53	3	725	72	mmu-miR-34a	0	0	0	0	522.88	3.98	816	1	mmu-miR-34a	2376.36	16.52	593.75	6.66	86.92	8.04	1000.5	110.16	mmu-miR-34a	1188.18	8.26	296.875	3.33	304.9	6.01	908.25	55.58	mmu-miR-34a	#DIV/0!	#DIV/0!	#DIV/0!	#DIV/0!
mmu-miR-128-2,mmu-miR-128-1	0	0	1	0	0	166	0	0	mmu-miR-128-2,mmu-miR-128-1	2760	6	619	3	1	93	1292	322	mmu-miR-128-2,mmu-miR-128-1	0	0	1.23	0	0	330.34	0	0	mmu-miR-128-2,mmu-miR-128-1	2263.2	7.08	588.05	3.33	1.64	249.24	1782.96	492.66	mmu-miR-128-2,mmu-miR-128-1	1131.6	3.54	294.64	1.665	0.82	289.79	891.48	246.33	mmu-miR-128-2,mmu-miR-128-1	0	0	100	0
mmu-miR-503	1654	6	2	1	455	1	0	1	mmu-miR-503	1757	1	532	3	262	141	1138	154	mmu-miR-503	1654	12.24	2.46	1.35	782.6	1.99	0	1	mmu-miR-503	1440.74	1.18	505.4	3.33	429.68	377.88	1570.44	235.62	mmu-miR-503	1547.37	6.71	253.93	2.34	606.14	189.935	785.22	118.31	mmu-miR-503	67235.8	497.561	100	54.878
mmu-miR-467e	0	0	0	0	0	0	0	0	mmu-miR-467e	660	1	496	0	1	1	477	113	mmu-miR-467e	0	0	0	0	0	0	0	0	mmu-miR-467e	541.2	1.18	471.2	0	1.64	2.68	658.26	172.89	mmu-miR-467e	270.6	0.59	235.6	0	0.82	1.34	329.13	86.445	mmu-miR-467e	#DIV/0!	#DIV/0!	#DIV/0!	#DIV/0!
mmu-miR-188	0	0	0	0	43	0	0	0	mmu-miR-188	2954	6	485	1	0	4	1055	343	mmu-miR-188	0	0	0	0	73.96	0	0	0	mmu-miR-188	2422.28	7.08	460.75	1.11	0	10.72	1455.9	524.79	mmu-miR-188	1211.14	3.54	230.375	0.555	36.98	5.36	727.95	262.395	mmu-miR-188	#DIV/0!	#DIV/0!	#DIV/0!	#DIV/0!
mmu-miR-301a	0	0	0	0	0	0	0	0	mmu-miR-301a	812	3	463	0	1	80	837	0	mmu-miR-301a	0	0	0	0	0	0	0	0	mmu-miR-301a	665.84	3.54	439.85	0	1.64	214.4	1155.06	0	mmu-miR-301a	332.92	1.77	219.925	0	0.82	107.2	577.53	0	mmu-miR-301a	#DIV/0!	#DIV/0!	#DIV/0!	#DIV/0!
mmu-miR-501-3p	0	0	0	0	1	1	778	1	mmu-miR-501-3p	394	1	436	0	0	157	1068	62	mmu-miR-501-3p	0	0	0	0	1.72	1.99	933.6	1	mmu-miR-501-3p	323.08	1.18	414.2	0	0	420.76	1473.84	94.86	mmu-miR-501-3p	161.54	0.59	207.1	0	0.86	211.375	1203.72	47.93	mmu-miR-501-3p	#DIV/0!	#DIV/0!	#DIV/0!	#DIV/0!
mmu-miR-152	0	0	0	0	0	134	0	0	mmu-miR-152	2919	4	430	0	0	4	827	316	mmu-miR-152	0	0	0	0	0	266.66	0	0	mmu-miR-152	2393.58	4.72	408.5	0	0	10.72	1141.26	483.48	mmu-miR-152	1196.79	2.36	204.25	0	0	138.69	570.63	241.74	mmu-miR-152	#DIV/0!	#DIV/0!	#DIV/0!	#DIV/0!
mmu-miR-297c-5p	0	0	0	0	112	0	0	0	mmu-miR-297c-5p	496	3	420	0	0	1	332	189	mmu-miR-297c-5p	0	0	0	0	192.64	0	0	0	mmu-miR-297c-5p	406.72	3.54	399	0	0	2.68	458.16	289.17	mmu-miR-297c-5p	203.36	1.77	199.5	0	96.32	1.34	229.08	144.585	mmu-miR-297c-5p	#DIV/0!	#DIV/0!	#DIV/0!	#DIV/0!
mmu-miR-132-3p	0	2	1	1	6	973	2986	6960	mmu-miR-132-3p	415	3	415	3	0	5	551	622	mmu-miR-132-3p	0	4.08	1.23	1.35	10.32	1936.27	3583.2	6960	mmu-miR-132-3p	340.3	3.54	394.25	3.33	0	13.4	760.38	951.66	mmu-miR-132-3p	170.15	3.81	197.74	2.34	5.16	974.835	2171.79	3955.83	mmu-miR-132-3p	0	331.707	100	109.756
mmu-miR-466f-1,mmu-miR-466f-3,mmu-miR-466f-2	0	0	0	0	51	0	0	0	mmu-miR-466f-1,mmu-miR-466f-3,mmu-miR-466f-2	492	0	415	0	145	0	317	63	mmu-miR-466f-1,mmu-miR-466f-3,mmu-miR-466f-2	0	0	0	0	87.72	0	0	0	mmu-miR-466f-1,mmu-miR-466f-3,mmu-miR-466f-2	403.44	0	394.25	0	237.8	0	437.46	96.39	mmu-miR-466f-1,mmu-miR-466f-3,mmu-miR-466f-2	201.72	0	197.125	0	162.76	0	218.73	48.195	mmu-miR-466f-1,mmu-miR-466f-3,mmu-miR-466f-2	#DIV/0!	#DIV/0!	#DIV/0!	#DIV/0!
mmu-miR-671	0	0	0	0	1902	2	1	0	mmu-miR-671	953	1	415	0	1245	5	768	719	mmu-miR-671	0	0	0	0	3271.44	3.98	1.2	0	mmu-miR-671	781.46	1.18	394.25	0	2041.8	13.4	1059.84	1100.07	mmu-miR-671	390.73	0.59	197.125	0	2656.62	8.69	530.52	550.035	mmu-miR-671	#DIV/0!	#DIV/0!	#DIV/0!	#DIV/0!
mmu-miR-129-1-5p	3926	7	0	0	1	0	0	0	mmu-miR-129-1-5p	12751	46	412	4	58	2	124	224	mmu-miR-129-1-5p	3926	14.28	0	0	1.72	0	0	0	mmu-miR-129-1-5p	10455.8	54.28	391.4	4.44	95.12	5.36	171.12	342.72	mmu-miR-129-1-5p	7190.91	34.28	195.7	2.22	48.42	2.68	85.56	171.36	mmu-miR-129-1-5p	#DIV/0!	#DIV/0!	#DIV/0!	#DIV/0!
mmu-miR-193-5p	800	4	4	3	7044	27	9069	8394	mmu-miR-193-5p	642	40	393	2	3974	2	514	274	mmu-miR-193-5p	800	8.16	4.92	4.05	12115.7	53.73	10882.8	8394	mmu-miR-193-5p	526.44	47.2	373.35	2.22	6517.36	5.36	709.32	419.22	mmu-miR-193-5p	663.22	27.68	189.135	3.135	9316.52	29.545	5796.06	4406.61	mmu-miR-193-5p	16260.2	165.854	100	82.3171
mmu-miR-146b	1	0	1	0	246	11	4172	3	mmu-miR-146b	1981	5	393	6	29	0	64	122	mmu-miR-146b	1	0	1.23	0	423.12	21.89	5006.4	3	mmu-miR-146b	1624.42	5.9	373.35	6.66	47.56	0	88.32	186.66	mmu-miR-146b	812.71	2.95	187.29	3.33	235.34	10.945	2547.36	94.83	mmu-miR-146b	81.3008	0	100	0
mmu-miR-421	0	0	0	0	0	0	0	0	mmu-miR-421	158	0	391	0	0	0	121	1	mmu-miR-421	0	0	0	0	0	0	0	0	mmu-miR-421	129.56	0	371.45	0	0	0	166.98	1.53	mmu-miR-421	64.78	0	185.725	0	0	0	83.49	0.765	mmu-miR-421	#DIV/0!	#DIV/0!	#DIV/0!	#DIV/0!
mmu-miR-92b	0	0	0	0	0	3	2	23	mmu-miR-92b	972	0	378	1	0	124	299	148	mmu-miR-92b	0	0	0	0	0	5.97	2.4	23	mmu-miR-92b	797.04	0	359.1	1.11	0	332.32	412.62	226.44	mmu-miR-92b	398.52	0	179.55	0.555	0	169.145	207.51	124.72	mmu-miR-92b	#DIV/0!	#DIV/0!	#DIV/0!	#DIV/0!
mmu-miR-466c-1-5p,mmu-miR-466c-5p,mmu-miR-466c-2-5p	0	0	0	0	103	0	0	0	mmu-miR-466c-1-5p,mmu-miR-466c-5p,mmu-miR-466c-2-5p	1143	0	360	6	1	1	500	504	mmu-miR-466c-1-5p,mmu-miR-466c-5p,mmu-miR-466c-2-5p	0	0	0	0	177.16	0	0	0	mmu-miR-466c-1-5p,mmu-miR-466c-5p,mmu-miR-466c-2-5p	937.26	0	342	6.66	1.64	2.68	690	771.12	mmu-miR-466c-1-5p,mmu-miR-466c-5p,mmu-miR-466c-2-5p	468.63	0	171	3.33	89.4	1.34	345	385.56	mmu-miR-466c-1-5p,mmu-miR-466c-5p,mmu-miR-466c-2-5p	#DIV/0!	#DIV/0!	#DIV/0!	#DIV/0!
mmu-miR-532-3p	0	0	0	0	0	172	0	0	mmu-miR-532-3p	1326	2	359	7	1	110	496	405	mmu-miR-532-3p	0	0	0	0	0	342.28	0	0	mmu-miR-532-3p	1087.32	2.36	341.05	7.77	1.64	294.8	684.48	619.65	mmu-miR-532-3p	543.66	1.18	170.525	3.885	0.82	318.54	342.24	309.825	mmu-miR-532-3p	#DIV/0!	#DIV/0!	#DIV/0!	#DIV/0!
mmu-miR-669c	0	0	0	0	0	0	0	0	mmu-miR-669c	467	0	346	0	0	0	359	0	mmu-miR-669c	0	0	0	0	0	0	0	0	mmu-miR-669c	382.94	0	328.7	0	0	0	495.42	0	mmu-miR-669c	191.47	0	164.35	0	0	0	247.71	0	mmu-miR-669c	#DIV/0!	#DIV/0!	#DIV/0!	#DIV/0!
mmu-miR-350	1	0	0	0	1	697	0	0	mmu-miR-350	952	4	334	111	0	126	997	514	mmu-miR-350	1	0	0	0	1.72	1387.03	0	0	mmu-miR-350	780.64	4.72	317.3	123.21	0	337.68	1375.86	786.42	mmu-miR-350	390.82	2.36	158.65	61.605	0.86	862.355	687.93	393.21	mmu-miR-350	#DIV/0!	#DIV/0!	#DIV/0!	#DIV/0!
mmu-miR-294	0	0	0	0	0	1149	1	0	mmu-miR-294	0	0	319	1	1	185	240	61	mmu-miR-294	0	0	0	0	0	2286.51	1.2	0	mmu-miR-294	0	0	303.05	1.11	1.64	495.8	331.2	93.33	mmu-miR-294	0	0	151.525	0.555	0.82	1391.15	166.2	46.665	mmu-miR-294	#DIV/0!	#DIV/0!	#DIV/0!	#DIV/0!
mmu-miR-130b-3p	0	0	2	1	72	1332	5373	7	mmu-miR-130b-3p	2886	2	315	1	1	200	505	349	mmu-miR-130b-3p	0	0	2.46	1.35	123.84	2650.68	6447.6	7	mmu-miR-130b-3p	2366.52	2.36	299.25	1.11	1.64	536	696.9	533.97	mmu-miR-130b-3p	1183.26	1.18	150.855	1.23	62.74	1593.34	3572.25	270.485	mmu-miR-130b-3p	0	0	100	54.878
mmu-miR-664-3p	0	0	0	0	0	297	0	0	mmu-miR-664-3p	176	0	295	0	0	116	61	117	mmu-miR-664-3p	0	0	0	0	0	591.03	0	0	mmu-miR-664-3p	144.32	0	280.25	0	0	310.88	84.18	179.01	mmu-miR-664-3p	72.16	0	140.125	0	0	450.955	42.09	89.505	mmu-miR-664-3p	#DIV/0!	#DIV/0!	#DIV/0!	#DIV/0!
mmu-miR-669f-5p	26	0	0	0	195	0	1	0	mmu-miR-669f-5p	345	0	292	1	183	0	116	228	mmu-miR-669f-5p	26	0	0	0	335.4	0	1.2	0	mmu-miR-669f-5p	282.9	0	277.4	1.11	300.12	0	160.08	348.84	mmu-miR-669f-5p	154.45	0	138.7	0.555	317.76	0	80.64	174.42	mmu-miR-669f-5p	#DIV/0!	#DIV/0!	#DIV/0!	#DIV/0!
mmu-miR-192	0	0	0	0	4	0	0	38	mmu-miR-192	870	2	291	1	71	2	531	858	mmu-miR-192	0	0	0	0	6.88	0	0	38	mmu-miR-192	713.4	2.36	276.45	1.11	116.44	5.36	732.78	1312.74	mmu-miR-192	356.7	1.18	138.225	0.555	61.66	2.68	366.39	675.37	mmu-miR-192	#DIV/0!	#DIV/0!	#DIV/0!	#DIV/0!
mmu-miR-466b-1-5p,mmu-miR-466b-7-5p,mmu-miR-466b-3-5p,mmu-miR-466b-4-5p,mmu-miR-466b-6-5p,mmu-miR-466e-5p,mmu-miR-466b-8-5p,mmu-miR-466b-2-5p,mmu-miR-466b-9-5p,mmu-miR-466o-5p,mmu-miR-466b-5-5p	0	0	0	0	227	0	0	0	mmu-miR-466b-1-5p,mmu-miR-466b-7-5p,mmu-miR-466b-3-5p,mmu-miR-466b-4-5p,mmu-miR-466b-6-5p,mmu-miR-466e-5p,mmu-miR-466b-8-5p,mmu-miR-466b-2-5p,mmu-miR-466b-9-5p,mmu-miR-466o-5p,mmu-miR-466b-5-5p	537	0	259	1	49	3	96	2	mmu-miR-466b-1-5p,mmu-miR-466b-7-5p,mmu-miR-466b-3-5p,mmu-miR-466b-4-5p,mmu-miR-466b-6-5p,mmu-miR-466e-5p,mmu-miR-466b-8-5p,mmu-miR-466b-2-5p,mmu-miR-466b-9-5p,mmu-miR-466o-5p,mmu-miR-466b-5-5p	0	0	0	0	390.44	0	0	0	mmu-miR-466b-1-5p,mmu-miR-466b-7-5p,mmu-miR-466b-3-5p,mmu-miR-466b-4-5p,mmu-miR-466b-6-5p,mmu-miR-466e-5p,mmu-miR-466b-8-5p,mmu-miR-466b-2-5p,mmu-miR-466b-9-5p,mmu-miR-466o-5p,mmu-miR-466b-5-5p	440.34	0	246.05	1.11	80.36	8.04	132.48	3.06	mmu-miR-466b-1-5p,mmu-miR-466b-7-5p,mmu-miR-466b-3-5p,mmu-miR-466b-4-5p,mmu-miR-466b-6-5p,mmu-miR-466e-5p,mmu-miR-466b-8-5p,mmu-miR-466b-2-5p,mmu-miR-466b-9-5p,mmu-miR-466o-5p,mmu-miR-466b-5-5p	220.17	0	123.025	0.555	235.4	4.02	66.24	1.53	mmu-miR-466b-1-5p,mmu-miR-466b-7-5p,mmu-miR-466b-3-5p,mmu-miR-466b-4-5p,mmu-miR-466b-6-5p,mmu-miR-466e-5p,mmu-miR-466b-8-5p,mmu-miR-466b-2-5p,mmu-miR-466b-9-5p,mmu-miR-466o-5p,mmu-miR-466b-5-5p	#DIV/0!	#DIV/0!	#DIV/0!	#DIV/0!
mmu-miR-669e	0	0	0	0	30	0	0	0	mmu-miR-669e	338	2	221	0	0	1	170	37	mmu-miR-669e	0	0	0	0	51.6	0	0	0	mmu-miR-669e	277.16	2.36	209.95	0	0	2.68	234.6	56.61	mmu-miR-669e	138.58	1.18	104.975	0	25.8	1.34	117.3	28.305	mmu-miR-669e	#DIV/0!	#DIV/0!	#DIV/0!	#DIV/0!
mmu-miR-676-3p	7714	12	4	2	0	0	1	1	mmu-miR-676-3p	1762	2	211	1	0	115	242	116	mmu-miR-676-3p	7714	24.48	4.92	2.7	0	0	1.2	1	mmu-miR-676-3p	1444.84	2.36	200.45	1.11	0	308.2	333.96	177.48	mmu-miR-676-3p	4579.42	13.42	102.685	1.905	0	154.1	167.58	89.24	mmu-miR-676-3p	156789	497.561	100	54.878
mmu-miR-450b-5p	0	0	0	0	312	0	0	0	mmu-miR-450b-5p	591	85	216	2	7	0	5	0	mmu-miR-450b-5p	0	0	0	0	536.64	0	0	0	mmu-miR-450b-5p	484.62	100.3	205.2	2.22	11.48	0	6.9	0	mmu-miR-450b-5p	242.31	50.15	102.6	1.11	274.06	0	3.45	0	mmu-miR-450b-5p	#DIV/0!	#DIV/0!	#DIV/0!	#DIV/0!
mmu-miR-29c	46	0	31	0	0	1	26	388	mmu-miR-29c	394	0	169	2	0	114	178	244	mmu-miR-29c	46	0	38.13	0	0	1.99	31.2	388	mmu-miR-29c	323.08	0	160.55	2.22	0	305.52	245.64	373.32	mmu-miR-29c	184.54	0	99.34	1.11	0	153.755	138.42	380.66	mmu-miR-29c	120.64	0	100	0
mmu-miR-1306	0	0	0	0	0	0	0	0	mmu-miR-1306	609	0	202	0	103	2	462	219	mmu-miR-1306	0	0	0	0	0	0	0	0	mmu-miR-1306	499.38	0	191.9	0	168.92	5.36	637.56	335.07	mmu-miR-1306	249.69	0	95.95	0	84.46	2.68	318.78	167.535	mmu-miR-1306	#DIV/0!	#DIV/0!	#DIV/0!	#DIV/0!
mmu-miR-877-5p	0	0	0	0	0	0	8	0	mmu-miR-877-5p	1	0	202	0	0	0	182	0	mmu-miR-877-5p	0	0	0	0	0	0	9.6	0	mmu-miR-877-5p	0.82	0	191.9	0	0	0	251.16	0	mmu-miR-877-5p	0.41	0	95.95	0	0	0	130.38	0	mmu-miR-877-5p	#DIV/0!	#DIV/0!	#DIV/0!	#DIV/0!
mmu-miR-187	0	0	0	0	0	0	0	0	mmu-miR-187	203	0	200	1	1	1	382	0	mmu-miR-187	0	0	0	0	0	0	0	0	mmu-miR-187	166.46	0	190	1.11	1.64	2.68	527.16	0	mmu-miR-187	83.23	0	95	0.555	0.82	1.34	263.58	0	mmu-miR-187	#DIV/0!	#DIV/0!	#DIV/0!	#DIV/0!
mmu-miR-664-5p	1126	1	0	0	143	0	1	1	mmu-miR-664-5p	438	1	195	0	188	3	237	227	mmu-miR-664-5p	1126	2.04	0	0	245.96	0	1.2	1	mmu-miR-664-5p	359.16	1.18	185.25	0	308.32	8.04	327.06	347.31	mmu-miR-664-5p	742.58	1.61	92.625	0	277.14	4.02	164.13	174.155	mmu-miR-664-5p	#DIV/0!	#DIV/0!	#DIV/0!	#DIV/0!
mmu-miR-297b-5p	0	0	1	0	212	0	3	0	mmu-miR-297b-5p	548	0	183	0	181	3	213	0	mmu-miR-297b-5p	0	0	1.23	0	364.64	0	3.6	0	mmu-miR-297b-5p	449.36	0	173.85	0	296.84	8.04	293.94	0	mmu-miR-297b-5p	224.68	0	87.54	0	330.74	4.02	148.77	0	mmu-miR-297b-5p	0	0	100	0
mmu-miR-146a	1	0	0	0	187	275	285	0	mmu-miR-146a	668	0	169	0	2	1	100	302	mmu-miR-146a	1	0	0	0	321.64	547.25	342	0	mmu-miR-146a	547.76	0	160.55	0	3.28	2.68	138	462.06	mmu-miR-146a	274.38	0	80.275	0	162.46	274.965	240	231.03	mmu-miR-146a	#DIV/0!	#DIV/0!	#DIV/0!	#DIV/0!
mmu-miR-101a	2479	5	9	0	0	0	5	2	mmu-miR-101a	663	4	156	0	0	3	239	6	mmu-miR-101a	2479	10.2	11.07	0	0	0	6	2	mmu-miR-101a	543.66	4.72	148.2	0	0	8.04	329.82	9.18	mmu-miR-101a	1511.33	7.46	79.635	0	0	4.02	167.91	5.59	mmu-miR-101a	22393.9	92.1409	100	0
mmu-miR-505-5p	0	0	0	0	0	0	0	0	mmu-miR-505-5p	86	0	164	0	0	0	101	0	mmu-miR-505-5p	0	0	0	0	0	0	0	0	mmu-miR-505-5p	70.52	0	155.8	0	0	0	139.38	0	mmu-miR-505-5p	35.26	0	77.9	0	0	0	69.69	0	mmu-miR-505-5p	#DIV/0!	#DIV/0!	#DIV/0!	#DIV/0!
mmu-miR-877-3p	0	0	0	0	0	0	0	0	mmu-miR-877-3p	64	0	160	0	0	0	139	104	mmu-miR-877-3p	0	0	0	0	0	0	0	0	mmu-miR-877-3p	52.48	0	152	0	0	0	191.82	159.12	mmu-miR-877-3p	26.24	0	76	0	0	0	95.91	79.56	mmu-miR-877-3p	#DIV/0!	#DIV/0!	#DIV/0!	#DIV/0!
mmu-miR-452-3p	0	0	0	0	0	0	0	0	mmu-miR-452-3p	734	0	153	0	1	0	733	0	mmu-miR-452-3p	0	0	0	0	0	0	0	0	mmu-miR-452-3p	601.88	0	145.35	0	1.64	0	1011.54	0	mmu-miR-452-3p	300.94	0	72.675	0	0.82	0	505.77	0	mmu-miR-452-3p	#DIV/0!	#DIV/0!	#DIV/0!	#DIV/0!
mmu-miR-330-5p	1	0	2	0	1242	2	8	5297	mmu-miR-330-5p	243	0	145	0	135	1	227	171	mmu-miR-330-5p	1	0	2.46	0	2136.24	3.98	9.6	5297	mmu-miR-330-5p	199.26	0	137.75	0	221.4	2.68	313.26	261.63	mmu-miR-330-5p	100.13	0	70.105	0	1178.82	3.33	161.43	2779.32	mmu-miR-330-5p	40.6504	0	100	0
mmu-miR-34b-3p	0	0	0	0	0	360	0	0	mmu-miR-34b-3p	1749	0	143	1	0	0	2	220	mmu-miR-34b-3p	0	0	0	0	0	716.4	0	0	mmu-miR-34b-3p	1434.18	0	135.85	1.11	0	0	2.76	336.6	mmu-miR-34b-3p	717.09	0	67.925	0.555	0	358.2	1.38	168.3	mmu-miR-34b-3p	#DIV/0!	#DIV/0!	#DIV/0!	#DIV/0!
mmu-miR-1981-5p	0	0	0	0	54	0	0	0	mmu-miR-1981-5p	56	0	138	0	0	3	935	1	mmu-miR-1981-5p	0	0	0	0	92.88	0	0	0	mmu-miR-1981-5p	45.92	0	131.1	0	0	8.04	1290.3	1.53	mmu-miR-1981-5p	22.96	0	65.55	0	46.44	4.02	645.15	0.765	mmu-miR-1981-5p	#DIV/0!	#DIV/0!	#DIV/0!	#DIV/0!
mmu-miR-339	0	0	0	0	0	0	0	0	mmu-miR-339	113	0	137	2	36	0	33	69	mmu-miR-339	0	0	0	0	0	0	0	0	mmu-miR-339	92.66	0	130.15	2.22	59.04	0	45.54	105.57	mmu-miR-339	46.33	0	65.075	1.11	29.52	0	22.77	52.785	mmu-miR-339	#DIV/0!	#DIV/0!	#DIV/0!	#DIV/0!
mmu-miR-466d-5p,mmu-miR-466n-5p	0	0	0	0	246	0	0	0	mmu-miR-466d-5p,mmu-miR-466n-5p	372	0	136	0	155	1	425	0	mmu-miR-466d-5p,mmu-miR-466n-5p	0	0	0	0	423.12	0	0	0	mmu-miR-466d-5p,mmu-miR-466n-5p	305.04	0	129.2	0	254.2	2.68	586.5	0	mmu-miR-466d-5p,mmu-miR-466n-5p	152.52	0	64.6	0	338.66	1.34	293.25	0	mmu-miR-466d-5p,mmu-miR-466n-5p	#DIV/0!	#DIV/0!	#DIV/0!	#DIV/0!
mmu-miR-344-2,mmu-miR-344-1	0	0	0	0	0	0	0	0	mmu-miR-344-2,mmu-miR-344-1	55	0	135	0	0	0	0	0	mmu-miR-344-2,mmu-miR-344-1	0	0	0	0	0	0	0	0	mmu-miR-344-2,mmu-miR-344-1	45.1	0	128.25	0	0	0	0	0	mmu-miR-344-2,mmu-miR-344-1	22.55	0	64.125	0	0	0	0	0	mmu-miR-344-2,mmu-miR-344-1	#DIV/0!	#DIV/0!	#DIV/0!	#DIV/0!
mmu-miR-452-5p	0	0	0	0	0	0	0	0	mmu-miR-452-5p	407	0	132	0	0	0	167	0	mmu-miR-452-5p	0	0	0	0	0	0	0	0	mmu-miR-452-5p	333.74	0	125.4	0	0	0	230.46	0	mmu-miR-452-5p	166.87	0	62.7	0	0	0	115.23	0	mmu-miR-452-5p	#DIV/0!	#DIV/0!	#DIV/0!	#DIV/0!
mmu-miR-501-5p	0	0	0	0	102	0	0	0	mmu-miR-501-5p	177	0	132	0	105	0	68	0	mmu-miR-501-5p	0	0	0	0	175.44	0	0	0	mmu-miR-501-5p	145.14	0	125.4	0	172.2	0	93.84	0	mmu-miR-501-5p	72.57	0	62.7	0	173.82	0	46.92	0	mmu-miR-501-5p	#DIV/0!	#DIV/0!	#DIV/0!	#DIV/0!
mmu-miR-669h	0	0	0	0	0	0	0	0	mmu-miR-669h	216	1	131	2	0	0	65	0	mmu-miR-669h	0	0	0	0	0	0	0	0	mmu-miR-669h	177.12	1.18	124.45	2.22	0	0	89.7	0	mmu-miR-669h	88.56	0.59	62.225	1.11	0	0	44.85	0	mmu-miR-669h	#DIV/0!	#DIV/0!	#DIV/0!	#DIV/0!
mmu-miR-450a-2-5p,mmu-miR-450a-1	0	0	0	0	19	0	0	0	mmu-miR-450a-2-5p,mmu-miR-450a-1	416	1	124	1	62	0	2	154	mmu-miR-450a-2-5p,mmu-miR-450a-1	0	0	0	0	32.68	0	0	0	mmu-miR-450a-2-5p,mmu-miR-450a-1	341.12	1.18	117.8	1.11	101.68	0	2.76	235.62	mmu-miR-450a-2-5p,mmu-miR-450a-1	170.56	0.59	58.9	0.555	67.18	0	1.38	117.81	mmu-miR-450a-2-5p,mmu-miR-450a-1	#DIV/0!	#DIV/0!	#DIV/0!	#DIV/0!
mmu-miR-351	0	0	0	0	0	7	1867	2	mmu-miR-351	1761	2	122	0	0	1	526	78	mmu-miR-351	0	0	0	0	0	13.93	2240.4	2	mmu-miR-351	1444.02	2.36	115.9	0	0	2.68	725.88	119.34	mmu-miR-351	722.01	1.18	57.95	0	0	8.305	1483.14	60.67	mmu-miR-351	#DIV/0!	#DIV/0!	#DIV/0!	#DIV/0!
mmu-miR-669l	0	0	0	0	67	1	0	1	mmu-miR-669l	729	0	120	0	1	3	428	0	mmu-miR-669l	0	0	0	0	115.24	1.99	0	1	mmu-miR-669l	597.78	0	114	0	1.64	8.04	590.64	0	mmu-miR-669l	298.89	0	57	0	58.44	5.015	295.32	0.5	mmu-miR-669l	#DIV/0!	#DIV/0!	#DIV/0!	#DIV/0!
mmu-miR-132-5p	0	1	0	0	237	0	0	0	mmu-miR-132-5p	147	1	119	2	0	0	318	71	mmu-miR-132-5p	0	2.04	0	0	407.64	0	0	0	mmu-miR-132-5p	120.54	1.18	113.05	2.22	0	0	438.84	108.63	mmu-miR-132-5p	60.27	1.61	56.525	1.11	203.82	0	219.42	54.315	mmu-miR-132-5p	#DIV/0!	#DIV/0!	#DIV/0!	#DIV/0!
mmu-miR-194-1,mmu-miR-194-2	0	0	0	0	0	0	0	0	mmu-miR-194-1,mmu-miR-194-2	269	0	117	2	60	1	257	136	mmu-miR-194-1,mmu-miR-194-2	0	0	0	0	0	0	0	0	mmu-miR-194-1,mmu-miR-194-2	220.58	0	111.15	2.22	98.4	2.68	354.66	208.08	mmu-miR-194-1,mmu-miR-194-2	110.29	0	55.575	1.11	49.2	1.34	177.33	104.04	mmu-miR-194-1,mmu-miR-194-2	#DIV/0!	#DIV/0!	#DIV/0!	#DIV/0!
mmu-miR-1955-5p	0	0	0	0	142	0	0	2	mmu-miR-1955-5p	136	0	108	0	0	0	24	98	mmu-miR-1955-5p	0	0	0	0	244.24	0	0	2	mmu-miR-1955-5p	111.52	0	102.6	0	0	0	33.12	149.94	mmu-miR-1955-5p	55.76	0	51.3	0	122.12	0	16.56	75.97	mmu-miR-1955-5p	#DIV/0!	#DIV/0!	#DIV/0!	#DIV/0!
mmu-miR-345-5p	0	0	0	0	46	0	0	0	mmu-miR-345-5p	94	0	104	0	83	3	261	0	mmu-miR-345-5p	0	0	0	0	79.12	0	0	0	mmu-miR-345-5p	77.08	0	98.8	0	136.12	8.04	360.18	0	mmu-miR-345-5p	38.54	0	49.4	0	107.62	4.02	180.09	0	mmu-miR-345-5p	#DIV/0!	#DIV/0!	#DIV/0!	#DIV/0!
mmu-miR-362-3p	0	0	0	0	0	0	0	0	mmu-miR-362-3p	385	0	102	0	1	0	199	40	mmu-miR-362-3p	0	0	0	0	0	0	0	0	mmu-miR-362-3p	315.7	0	96.9	0	1.64	0	274.62	61.2	mmu-miR-362-3p	157.85	0	48.45	0	0.82	0	137.31	30.6	mmu-miR-362-3p	#DIV/0!	#DIV/0!	#DIV/0!	#DIV/0!
mmu-miR-129-2	0	0	0	0	0	0	0	0	mmu-miR-129-2	3381	0	95	0	0	0	64	21	mmu-miR-129-2	0	0	0	0	0	0	0	0	mmu-miR-129-2	2772.42	0	90.25	0	0	0	88.32	32.13	mmu-miR-129-2	1386.21	0	45.125	0	0	0	44.16	16.065	mmu-miR-129-2	#DIV/0!	#DIV/0!	#DIV/0!	#DIV/0!
mmu-miR-1934	0	0	0	0	0	0	0	0	mmu-miR-1934	1	0	94	0	0	0	14	0	mmu-miR-1934	0	0	0	0	0	0	0	0	mmu-miR-1934	0.82	0	89.3	0	0	0	19.32	0	mmu-miR-1934	0.41	0	44.65	0	0	0	9.66	0	mmu-miR-1934	#DIV/0!	#DIV/0!	#DIV/0!	#DIV/0!
mmu-miR-297c-3p,mmu-miR-297a-4-3p,mmu-miR-297b-3p,mmu-miR-297a-3-3p	0	0	0	0	1	343	0	0	mmu-miR-297c-3p,mmu-miR-297a-4-3p,mmu-miR-297b-3p,mmu-miR-297a-3-3p	335	0	92	0	0	1	1	133	mmu-miR-297c-3p,mmu-miR-297a-4-3p,mmu-miR-297b-3p,mmu-miR-297a-3-3p	0	0	0	0	1.72	682.57	0	0	mmu-miR-297c-3p,mmu-miR-297a-4-3p,mmu-miR-297b-3p,mmu-miR-297a-3-3p	274.7	0	87.4	0	0	2.68	1.38	203.49	mmu-miR-297c-3p,mmu-miR-297a-4-3p,mmu-miR-297b-3p,mmu-miR-297a-3-3p	137.35	0	43.7	0	0.86	342.625	0.69	101.745	mmu-miR-297c-3p,mmu-miR-297a-4-3p,mmu-miR-297b-3p,mmu-miR-297a-3-3p	#DIV/0!	#DIV/0!	#DIV/0!	#DIV/0!
mmu-miR-135a-2,mmu-miR-135a-1	0	0	0	0	0	0	0	0	mmu-miR-135a-2,mmu-miR-135a-1	363	1	88	0	66	0	65	0	mmu-miR-135a-2,mmu-miR-135a-1	0	0	0	0	0	0	0	0	mmu-miR-135a-2,mmu-miR-135a-1	297.66	1.18	83.6	0	108.24	0	89.7	0	mmu-miR-135a-2,mmu-miR-135a-1	148.83	0.59	41.8	0	54.12	0	44.85	0	mmu-miR-135a-2,mmu-miR-135a-1	#DIV/0!	#DIV/0!	#DIV/0!	#DIV/0!
mmu-miR-466n-3p	0	0	0	0	0	0	0	0	mmu-miR-466n-3p	166	0	86	4	0	1	104	0	mmu-miR-466n-3p	0	0	0	0	0	0	0	0	mmu-miR-466n-3p	136.12	0	81.7	4.44	0	2.68	143.52	0	mmu-miR-466n-3p	68.06	0	40.85	2.22	0	1.34	71.76	0	mmu-miR-466n-3p	#DIV/0!	#DIV/0!	#DIV/0!	#DIV/0!
mmu-miR-1982	0	0	0	0	0	1	0	0	mmu-miR-1982	155	0	85	0	0	0	0	0	mmu-miR-1982	0	0	0	0	0	1.99	0	0	mmu-miR-1982	127.1	0	80.75	0	0	0	0	0	mmu-miR-1982	63.55	0	40.375	0	0	0.995	0	0	mmu-miR-1982	#DIV/0!	#DIV/0!	#DIV/0!	#DIV/0!
mmu-miR-3057-5p	0	0	1	0	261	0	0	0	mmu-miR-3057-5p	104	0	82	0	51	0	0	0	mmu-miR-3057-5p	0	0	1.23	0	448.92	0	0	0	mmu-miR-3057-5p	85.28	0	77.9	0	83.64	0	0	0	mmu-miR-3057-5p	42.64	0	39.565	0	266.28	0	0	0	mmu-miR-3057-5p	0	0	100	0
mmu-miR-1189	0	0	0	0	0	258	0	0	mmu-miR-1189	23	0	83	1	0	43	245	87	mmu-miR-1189	0	0	0	0	0	513.42	0	0	mmu-miR-1189	18.86	0	78.85	1.11	0	115.24	338.1	133.11	mmu-miR-1189	9.43	0	39.425	0.555	0	314.33	169.05	66.555	mmu-miR-1189	#DIV/0!	#DIV/0!	#DIV/0!	#DIV/0!
mmu-miR-210	3326	11	0	0	0	147	0	0	mmu-miR-210	664	1	82	4	1	195	244	163	mmu-miR-210	3326	22.44	0	0	0	292.53	0	0	mmu-miR-210	544.48	1.18	77.9	4.44	1.64	522.6	336.72	249.39	mmu-miR-210	1935.24	11.81	38.95	2.22	0.82	407.565	168.36	124.695	mmu-miR-210	#DIV/0!	#DIV/0!	#DIV/0!	#DIV/0!
mmu-miR-34c	0	2	1	3	84	0	1	6725	mmu-miR-34c	1678	0	79	0	80	0	146	78	mmu-miR-34c	0	4.08	1.23	4.05	144.48	0	1.2	6725	mmu-miR-34c	1375.96	0	75.05	0	131.2	0	201.48	119.34	mmu-miR-34c	687.98	2.04	38.14	2.025	137.84	0	101.34	3422.17	mmu-miR-34c	0	331.707	100	329.268
mmu-miR-708	0	0	0	0	0	0	0	0	mmu-miR-708	165	0	80	70	0	2	261	0	mmu-miR-708	0	0	0	0	0	0	0	0	mmu-miR-708	135.3	0	76	77.7	0	5.36	360.18	0	mmu-miR-708	67.65	0	38	38.85	0	2.68	180.09	0	mmu-miR-708	#DIV/0!	#DIV/0!	#DIV/0!	#DIV/0!
mmu-miR-1198-3p	0	0	0	0	0	363	0	2	mmu-miR-1198-3p	0	0	74	3	0	485	80	50	mmu-miR-1198-3p	0	0	0	0	0	722.37	0	2	mmu-miR-1198-3p	0	0	70.3	3.33	0	1299.8	110.4	76.5	mmu-miR-1198-3p	0	0	35.15	1.665	0	1011.09	55.2	39.25	mmu-miR-1198-3p	#DIV/0!	#DIV/0!	#DIV/0!	#DIV/0!
mmu-miR-7b	23	0	16	0	0	0	4	8	mmu-miR-7b	3	0	52	0	0	0	0	0	mmu-miR-7b	23	0	19.68	0	0	0	4.8	8	mmu-miR-7b	2.46	0	49.4	0	0	0	0	0	mmu-miR-7b	12.73	0	34.54	0	0	0	2.4	4	mmu-miR-7b	116.87	0	100	0
mmu-miR-669d-2,mmu-miR-669d	0	0	0	0	48	0	0	0	mmu-miR-669d-2,mmu-miR-669d	694	0	72	0	0	0	155	541	mmu-miR-669d-2,mmu-miR-669d	0	0	0	0	82.56	0	0	0	mmu-miR-669d-2,mmu-miR-669d	569.08	0	68.4	0	0	0	213.9	827.73	mmu-miR-669d-2,mmu-miR-669d	284.54	0	34.2	0	41.28	0	106.95	413.865	mmu-miR-669d-2,mmu-miR-669d	#DIV/0!	#DIV/0!	#DIV/0!	#DIV/0!
mmu-miR-669o-5p	0	0	0	0	163	0	0	0	mmu-miR-669o-5p	355	0	71	0	35	1	201	0	mmu-miR-669o-5p	0	0	0	0	280.36	0	0	0	mmu-miR-669o-5p	291.1	0	67.45	0	57.4	2.68	277.38	0	mmu-miR-669o-5p	145.55	0	33.725	0	168.88	1.34	138.69	0	mmu-miR-669o-5p	#DIV/0!	#DIV/0!	#DIV/0!	#DIV/0!
mmu-miR-1941-3p	0	0	0	0	0	0	0	0	mmu-miR-1941-3p	0	0	67	0	0	0	0	0	mmu-miR-1941-3p	0	0	0	0	0	0	0	0	mmu-miR-1941-3p	0	0	63.65	0	0	0	0	0	mmu-miR-1941-3p	0	0	31.825	0	0	0	0	0	mmu-miR-1941-3p	#DIV/0!	#DIV/0!	#DIV/0!	#DIV/0!
mmu-miR-130b-5p	0	2	2	3	1051	15	1715	16255	mmu-miR-130b-5p	645	0	63	0	208	103	390	114	mmu-miR-130b-5p	0	4.08	2.46	4.05	1807.72	29.85	2058	16255	mmu-miR-130b-5p	528.9	0	59.85	0	341.12	276.04	538.2	174.42	mmu-miR-130b-5p	264.45	2.04	31.155	2.025	1074.42	152.945	1298.1	8214.71	mmu-miR-130b-5p	0	165.854	100	164.634
mmu-miR-362-5p	0	0	0	0	0	0	0	0	mmu-miR-362-5p	40	0	50	0	0	0	88	0	mmu-miR-362-5p	0	0	0	0	0	0	0	0	mmu-miR-362-5p	32.8	0	47.5	0	0	0	121.44	0	mmu-miR-362-5p	16.4	0	23.75	0	0	0	60.72	0	mmu-miR-362-5p	#DIV/0!	#DIV/0!	#DIV/0!	#DIV/0!
mmu-miR-295	0	0	0	0	0	0	0	0	mmu-miR-295	0	0	47	0	0	0	0	0	mmu-miR-295	0	0	0	0	0	0	0	0	mmu-miR-295	0	0	44.65	0	0	0	0	0	mmu-miR-295	0	0	22.325	0	0	0	0	0	mmu-miR-295	#DIV/0!	#DIV/0!	#DIV/0!	#DIV/0!
mmu-miR-106a	0	0	1	0	0	0	0	1	mmu-miR-106a	0	0	45	0	0	1	1	0	mmu-miR-106a	0	0	1.23	0	0	0	0	1	mmu-miR-106a	0	0	42.75	0	0	2.68	1.38	0	mmu-miR-106a	0	0	21.99	0	0	1.34	0.69	0.5	mmu-miR-106a	0	0	100	0
mmu-miR-190	0	0	0	0	0	0	0	0	mmu-miR-190	187	0	42	0	0	0	0	0	mmu-miR-190	0	0	0	0	0	0	0	0	mmu-miR-190	153.34	0	39.9	0	0	0	0	0	mmu-miR-190	76.67	0	19.95	0	0	0	0	0	mmu-miR-190	#DIV/0!	#DIV/0!	#DIV/0!	#DIV/0!
mmu-miR-212-5p	0	0	0	0	266	0	3	1	mmu-miR-212-5p	49	0	42	0	0	0	228	144	mmu-miR-212-5p	0	0	0	0	457.52	0	3.6	1	mmu-miR-212-5p	40.18	0	39.9	0	0	0	314.64	220.32	mmu-miR-212-5p	20.09	0	19.95	0	228.76	0	159.12	110.66	mmu-miR-212-5p	#DIV/0!	#DIV/0!	#DIV/0!	#DIV/0!
mmu-miR-300	0	0	0	0	0	0	0	0	mmu-miR-300	0	0	42	0	0	0	0	0	mmu-miR-300	0	0	0	0	0	0	0	0	mmu-miR-300	0	0	39.9	0	0	0	0	0	mmu-miR-300	0	0	19.95	0	0	0	0	0	mmu-miR-300	#DIV/0!	#DIV/0!	#DIV/0!	#DIV/0!
mmu-miR-760-3p	0	0	0	0	0	0	0	0	mmu-miR-760-3p	0	0	42	0	0	0	0	0	mmu-miR-760-3p	0	0	0	0	0	0	0	0	mmu-miR-760-3p	0	0	39.9	0	0	0	0	0	mmu-miR-760-3p	0	0	19.95	0	0	0	0	0	mmu-miR-760-3p	#DIV/0!	#DIV/0!	#DIV/0!	#DIV/0!
mmu-miR-881	0	0	0	0	0	0	0	0	mmu-miR-881	0	0	42	0	0	0	0	0	mmu-miR-881	0	0	0	0	0	0	0	0	mmu-miR-881	0	0	39.9	0	0	0	0	0	mmu-miR-881	0	0	19.95	0	0	0	0	0	mmu-miR-881	#DIV/0!	#DIV/0!	#DIV/0!	#DIV/0!
mmu-miR-3086-3p	0	0	0	0	0	0	0	0	mmu-miR-3086-3p	0	0	40	0	0	0	0	0	mmu-miR-3086-3p	0	0	0	0	0	0	0	0	mmu-miR-3086-3p	0	0	38	0	0	0	0	0	mmu-miR-3086-3p	0	0	19	0	0	0	0	0	mmu-miR-3086-3p	#DIV/0!	#DIV/0!	#DIV/0!	#DIV/0!
mmu-miR-466p-5p,mmu-miR-466a-5p	0	0	0	0	407	0	1	0	mmu-miR-466p-5p,mmu-miR-466a-5p	327	0	40	0	768	0	386	170	mmu-miR-466p-5p,mmu-miR-466a-5p	0	0	0	0	700.04	0	1.2	0	mmu-miR-466p-5p,mmu-miR-466a-5p	268.14	0	38	0	1259.52	0	532.68	260.1	mmu-miR-466p-5p,mmu-miR-466a-5p	134.07	0	19	0	979.78	0	266.94	130.05	mmu-miR-466p-5p,mmu-miR-466a-5p	#DIV/0!	#DIV/0!	#DIV/0!	#DIV/0!
mmu-miR-486,mmu-miR-3107	0	0	0	0	0	0	0	0	mmu-miR-486,mmu-miR-3107	135	0	40	0	1	0	301	0	mmu-miR-486,mmu-miR-3107	0	0	0	0	0	0	0	0	mmu-miR-486,mmu-miR-3107	110.7	0	38	0	1.64	0	415.38	0	mmu-miR-486,mmu-miR-3107	55.35	0	19	0	0.82	0	207.69	0	mmu-miR-486,mmu-miR-3107	#DIV/0!	#DIV/0!	#DIV/0!	#DIV/0!
mmu-miR-670-3p	0	0	0	0	0	0	0	0	mmu-miR-670-3p	0	0	39	0	0	0	0	0	mmu-miR-670-3p	0	0	0	0	0	0	0	0	mmu-miR-670-3p	0	0	37.05	0	0	0	0	0	mmu-miR-670-3p	0	0	18.525	0	0	0	0	0	mmu-miR-670-3p	#DIV/0!	#DIV/0!	#DIV/0!	#DIV/0!
mmu-miR-126-5p	0	0	0	0	0	0	0	0	mmu-miR-126-5p	0	1	38	0	0	0	0	0	mmu-miR-126-5p	0	0	0	0	0	0	0	0	mmu-miR-126-5p	0	1.18	36.1	0	0	0	0	0	mmu-miR-126-5p	0	0.59	18.05	0	0	0	0	0	mmu-miR-126-5p	#DIV/0!	#DIV/0!	#DIV/0!	#DIV/0!
mmu-miR-1947	0	0	0	0	0	0	0	0	mmu-miR-1947	39	0	38	1	0	0	0	0	mmu-miR-1947	0	0	0	0	0	0	0	0	mmu-miR-1947	31.98	0	36.1	1.11	0	0	0	0	mmu-miR-1947	15.99	0	18.05	0.555	0	0	0	0	mmu-miR-1947	#DIV/0!	#DIV/0!	#DIV/0!	#DIV/0!
mmu-miR-1964-5p	0	0	0	0	13	0	0	0	mmu-miR-1964-5p	0	0	38	0	0	0	0	0	mmu-miR-1964-5p	0	0	0	0	22.36	0	0	0	mmu-miR-1964-5p	0	0	36.1	0	0	0	0	0	mmu-miR-1964-5p	0	0	18.05	0	11.18	0	0	0	mmu-miR-1964-5p	#DIV/0!	#DIV/0!	#DIV/0!	#DIV/0!
mmu-miR-455-3p	0	0	0	0	0	0	0	0	mmu-miR-455-3p	954	0	38	0	0	0	0	0	mmu-miR-455-3p	0	0	0	0	0	0	0	0	mmu-miR-455-3p	782.28	0	36.1	0	0	0	0	0	mmu-miR-455-3p	391.14	0	18.05	0	0	0	0	0	mmu-miR-455-3p	#DIV/0!	#DIV/0!	#DIV/0!	#DIV/0!
mmu-miR-669a-1-3p	0	0	0	0	0	1	0	0	mmu-miR-669a-1-3p	48	0	38	0	1	1	149	2	mmu-miR-669a-1-3p	0	0	0	0	0	1.99	0	0	mmu-miR-669a-1-3p	39.36	0	36.1	0	1.64	2.68	205.62	3.06	mmu-miR-669a-1-3p	19.68	0	18.05	0	0.82	2.335	102.81	1.53	mmu-miR-669a-1-3p	#DIV/0!	#DIV/0!	#DIV/0!	#DIV/0!
mmu-miR-1839	0	0	0	0	0	0	0	0	mmu-miR-1839	139	0	37	0	0	0	0	47	mmu-miR-1839	0	0	0	0	0	0	0	0	mmu-miR-1839	113.98	0	35.15	0	0	0	0	71.91	mmu-miR-1839	56.99	0	17.575	0	0	0	0	35.955	mmu-miR-1839	#DIV/0!	#DIV/0!	#DIV/0!	#DIV/0!
mmu-miR-181d	2	0	3	0	0	0	2	0	mmu-miR-181d	75	0	32	0	62	0	85	81	mmu-miR-181d	2	0	3.69	0	0	0	2.4	0	mmu-miR-181d	61.5	0	30.4	0	101.68	0	117.3	123.93	mmu-miR-181d	31.75	0	17.045	0	50.84	0	59.85	61.965	mmu-miR-181d	54.2005	0	100	0
mmu-miR-1968	0	0	0	0	0	0	0	0	mmu-miR-1968	0	0	33	0	0	0	0	0	mmu-miR-1968	0	0	0	0	0	0	0	0	mmu-miR-1968	0	0	31.35	0	0	0	0	0	mmu-miR-1968	0	0	15.675	0	0	0	0	0	mmu-miR-1968	#DIV/0!	#DIV/0!	#DIV/0!	#DIV/0!
mmu-miR-542	0	0	0	0	0	200	0	0	mmu-miR-542	160	0	33	0	0	0	0	0	mmu-miR-542	0	0	0	0	0	398	0	0	mmu-miR-542	131.2	0	31.35	0	0	0	0	0	mmu-miR-542	65.6	0	15.675	0	0	199	0	0	mmu-miR-542	#DIV/0!	#DIV/0!	#DIV/0!	#DIV/0!
mmu-miR-3076-3p	0	0	0	0	0	0	0	0	mmu-miR-3076-3p	0	0	32	0	0	0	0	0	mmu-miR-3076-3p	0	0	0	0	0	0	0	0	mmu-miR-3076-3p	0	0	30.4	0	0	0	0	0	mmu-miR-3076-3p	0	0	15.2	0	0	0	0	0	mmu-miR-3076-3p	#DIV/0!	#DIV/0!	#DIV/0!	#DIV/0!
mmu-miR-1955-3p	0	0	0	0	0	0	0	0	mmu-miR-1955-3p	0	0	31	0	0	0	0	0	mmu-miR-1955-3p	0	0	0	0	0	0	0	0	mmu-miR-1955-3p	0	0	29.45	0	0	0	0	0	mmu-miR-1955-3p	0	0	14.725	0	0	0	0	0	mmu-miR-1955-3p	#DIV/0!	#DIV/0!	#DIV/0!	#DIV/0!
mmu-miR-338-3p	0	0	0	0	0	0	0	0	mmu-miR-338-3p	0	0	31	0	0	0	0	0	mmu-miR-338-3p	0	0	0	0	0	0	0	0	mmu-miR-338-3p	0	0	29.45	0	0	0	0	0	mmu-miR-338-3p	0	0	14.725	0	0	0	0	0	mmu-miR-338-3p	#DIV/0!	#DIV/0!	#DIV/0!	#DIV/0!
mmu-miR-9-1,mmu-miR-9-3,mmu-miR-9-2	0	0	0	0	0	0	0	0	mmu-miR-9-1,mmu-miR-9-3,mmu-miR-9-2	942	0	30	0	0	0	0	107	mmu-miR-9-1,mmu-miR-9-3,mmu-miR-9-2	0	0	0	0	0	0	0	0	mmu-miR-9-1,mmu-miR-9-3,mmu-miR-9-2	772.44	0	28.5	0	0	0	0	163.71	mmu-miR-9-1,mmu-miR-9-3,mmu-miR-9-2	386.22	0	14.25	0	0	0	0	81.855	mmu-miR-9-1,mmu-miR-9-3,mmu-miR-9-2	#DIV/0!	#DIV/0!	#DIV/0!	#DIV/0!
mmu-miR-326	0	0	0	0	0	170	0	0	mmu-miR-326	337	0	29	0	0	1	195	67	mmu-miR-326	0	0	0	0	0	338.3	0	0	mmu-miR-326	276.34	0	27.55	0	0	2.68	269.1	102.51	mmu-miR-326	138.17	0	13.775	0	0	170.49	134.55	51.255	mmu-miR-326	#DIV/0!	#DIV/0!	#DIV/0!	#DIV/0!
mmu-miR-200a	0	0	0	0	0	0	0	0	mmu-miR-200a	0	0	27	0	0	0	85	0	mmu-miR-200a	0	0	0	0	0	0	0	0	mmu-miR-200a	0	0	25.65	0	0	0	117.3	0	mmu-miR-200a	0	0	12.825	0	0	0	58.65	0	mmu-miR-200a	#DIV/0!	#DIV/0!	#DIV/0!	#DIV/0!
mmu-miR-3084	0	0	0	0	0	0	0	0	mmu-miR-3084	113	0	27	0	0	0	0	0	mmu-miR-3084	0	0	0	0	0	0	0	0	mmu-miR-3084	92.66	0	25.65	0	0	0	0	0	mmu-miR-3084	46.33	0	12.825	0	0	0	0	0	mmu-miR-3084	#DIV/0!	#DIV/0!	#DIV/0!	#DIV/0!
mmu-miR-467d	1	0	19	0	59	0	0	0	mmu-miR-467d	1752	3	2	0	212	3	821	1047	mmu-miR-467d	1	0	23.37	0	101.48	0	0	0	mmu-miR-467d	1436.64	3.54	1.9	0	347.68	8.04	1132.98	1601.91	mmu-miR-467d	718.82	1.77	12.635	0	224.58	4.02	566.49	800.955	mmu-miR-467d	4.27899	0	100	0
mmu-miR-1981-3p	0	0	0	0	0	0	0	0	mmu-miR-1981-3p	53	0	26	0	0	0	64	0	mmu-miR-1981-3p	0	0	0	0	0	0	0	0	mmu-miR-1981-3p	43.46	0	24.7	0	0	0	88.32	0	mmu-miR-1981-3p	21.73	0	12.35	0	0	0	44.16	0	mmu-miR-1981-3p	#DIV/0!	#DIV/0!	#DIV/0!	#DIV/0!
mmu-miR-297a-5-3p	0	0	0	0	0	0	0	0	mmu-miR-297a-5-3p	49	0	24	0	0	0	0	0	mmu-miR-297a-5-3p	0	0	0	0	0	0	0	0	mmu-miR-297a-5-3p	40.18	0	22.8	0	0	0	0	0	mmu-miR-297a-5-3p	20.09	0	11.4	0	0	0	0	0	mmu-miR-297a-5-3p	#DIV/0!	#DIV/0!	#DIV/0!	#DIV/0!
mmu-miR-3061-3p	0	0	0	0	0	0	0	0	mmu-miR-3061-3p	0	0	20	0	0	0	0	0	mmu-miR-3061-3p	0	0	0	0	0	0	0	0	mmu-miR-3061-3p	0	0	19	0	0	0	0	0	mmu-miR-3061-3p	0	0	9.5	0	0	0	0	0	mmu-miR-3061-3p	#DIV/0!	#DIV/0!	#DIV/0!	#DIV/0!
mmu-miR-3095-3p	0	0	0	0	0	0	0	0	mmu-miR-3095-3p	96	0	20	0	0	0	0	0	mmu-miR-3095-3p	0	0	0	0	0	0	0	0	mmu-miR-3095-3p	78.72	0	19	0	0	0	0	0	mmu-miR-3095-3p	39.36	0	9.5	0	0	0	0	0	mmu-miR-3095-3p	#DIV/0!	#DIV/0!	#DIV/0!	#DIV/0!
mmu-miR-470-5p	0	0	0	0	27	0	0	0	mmu-miR-470-5p	0	0	20	0	0	0	0	0	mmu-miR-470-5p	0	0	0	0	46.44	0	0	0	mmu-miR-470-5p	0	0	19	0	0	0	0	0	mmu-miR-470-5p	0	0	9.5	0	23.22	0	0	0	mmu-miR-470-5p	#DIV/0!	#DIV/0!	#DIV/0!	#DIV/0!
mmu-miR-10a	0	5	12	0	1	0	1	4	mmu-miR-10a	1622	0	0	0	0	0	0	1	mmu-miR-10a	0	10.2	14.76	0	1.72	0	1.2	4	mmu-miR-10a	1330.04	0	0	0	0	0	0	1.53	mmu-miR-10a	665.02	5.1	7.38	0	0.86	0	0.6	2.765	mmu-miR-10a	0	69.1057	100	0
mmu-miR-499	0	0	0	0	0	0	0	0	mmu-miR-499	0	0	14	0	0	0	0	73	mmu-miR-499	0	0	0	0	0	0	0	0	mmu-miR-499	0	0	13.3	0	0	0	0	111.69	mmu-miR-499	0	0	6.65	0	0	0	0	55.845	mmu-miR-499	#DIV/0!	#DIV/0!	#DIV/0!	#DIV/0!
mmu-miR-3061-5p	0	0	0	0	0	0	0	0	mmu-miR-3061-5p	49	0	13	0	0	0	0	0	mmu-miR-3061-5p	0	0	0	0	0	0	0	0	mmu-miR-3061-5p	40.18	0	12.35	0	0	0	0	0	mmu-miR-3061-5p	20.09	0	6.175	0	0	0	0	0	mmu-miR-3061-5p	#DIV/0!	#DIV/0!	#DIV/0!	#DIV/0!
mmu-miR-20b	0	0	10	0	1	0	1	15	mmu-miR-20b	15	0	0	0	0	0	10	5	mmu-miR-20b	0	0	12.3	0	1.72	0	1.2	15	mmu-miR-20b	12.3	0	0	0	0	0	13.8	7.65	mmu-miR-20b	6.15	0	6.15	0	0.86	0	7.5	11.325	mmu-miR-20b	0	0	100	0
mmu-miR-3096-3p	0	0	0	0	0	0	0	0	mmu-miR-3096-3p	0	0	7	0	0	0	0	0	mmu-miR-3096-3p	0	0	0	0	0	0	0	0	mmu-miR-3096-3p	0	0	6.65	0	0	0	0	0	mmu-miR-3096-3p	0	0	3.325	0	0	0	0	0	mmu-miR-3096-3p	#DIV/0!	#DIV/0!	#DIV/0!	#DIV/0!
mmu-miR-449a	1	0	3	0	104	0	1	9821	mmu-miR-449a	240	0	3	0	0	0	111	0	mmu-miR-449a	1	0	3.69	0	178.88	0	1.2	9821	mmu-miR-449a	196.8	0	2.85	0	0	0	153.18	0	mmu-miR-449a	98.9	0	3.27	0	89.44	0	77.19	4910.5	mmu-miR-449a	27.1003	0	100	0
mmu-miR-3102.2-5p	0	0	0	0	0	0	0	0	mmu-miR-3102.2-5p	25	0	2	0	0	0	0	0	mmu-miR-3102.2-5p	0	0	0	0	0	0	0	0	mmu-miR-3102.2-5p	20.5	0	1.9	0	0	0	0	0	mmu-miR-3102.2-5p	10.25	0	0.95	0	0	0	0	0	mmu-miR-3102.2-5p	#DIV/0!	#DIV/0!	#DIV/0!	#DIV/0!
mmu-miR-1930	0	0	0	0	56	0	0	0	mmu-miR-1930	0	0	1	0	0	0	71	0	mmu-miR-1930	0	0	0	0	96.32	0	0	0	mmu-miR-1930	0	0	0.95	0	0	0	97.98	0	mmu-miR-1930	0	0	0.475	0	48.16	0	48.99	0	mmu-miR-1930	#DIV/0!	#DIV/0!	#DIV/0!	#DIV/0!
mmu-miR-3108	0	0	0	0	0	0	0	0	mmu-miR-3108	0	0	1	0	0	1	73	0	mmu-miR-3108	0	0	0	0	0	0	0	0	mmu-miR-3108	0	0	0.95	0	0	2.68	100.74	0	mmu-miR-3108	0	0	0.475	0	0	1.34	50.37	0	mmu-miR-3108	#DIV/0!	#DIV/0!	#DIV/0!	#DIV/0!
mmu-miR-466m-3p	0	0	0	0	0	0	0	0	mmu-miR-466m-3p	176	0	1	0	0	0	0	0	mmu-miR-466m-3p	0	0	0	0	0	0	0	0	mmu-miR-466m-3p	144.32	0	0.95	0	0	0	0	0	mmu-miR-466m-3p	72.16	0	0.475	0	0	0	0	0	mmu-miR-466m-3p	#DIV/0!	#DIV/0!	#DIV/0!	#DIV/0!
mmu-miR-466m-5p	0	0	0	0	0	0	0	0	mmu-miR-466m-5p	1	0	1	0	0	0	0	0	mmu-miR-466m-5p	0	0	0	0	0	0	0	0	mmu-miR-466m-5p	0.82	0	0.95	0	0	0	0	0	mmu-miR-466m-5p	0.41	0	0.475	0	0	0	0	0	mmu-miR-466m-5p	#DIV/0!	#DIV/0!	#DIV/0!	#DIV/0!
mmu-miR-1-2-as	0	0	0	0	0	209	0	0	mmu-miR-1-2-as	28	0	0	0	0	0	0	0	mmu-miR-1-2-as	0	0	0	0	0	415.91	0	0	mmu-miR-1-2-as	22.96	0	0	0	0	0	0	0	mmu-miR-1-2-as	11.48	0	0	0	0	207.955	0	0	mmu-miR-1-2-as	#DIV/0!	#DIV/0!	#DIV/0!	#DIV/0!
mmu-miR-122	0	0	0	0	0	0	0	0	mmu-miR-122	0	0	0	71	0	0	0	0	mmu-miR-122	0	0	0	0	0	0	0	0	mmu-miR-122	0	0	0	78.81	0	0	0	0	mmu-miR-122	0	0	0	39.405	0	0	0	0	mmu-miR-122	#DIV/0!	#DIV/0!	#DIV/0!	#DIV/0!
mmu-miR-1247	0	0	0	0	139	0	0	0	mmu-miR-1247	0	0	0	0	0	0	0	0	mmu-miR-1247	0	0	0	0	239.08	0	0	0	mmu-miR-1247	0	0	0	0	0	0	0	0	mmu-miR-1247	0	0	0	0	119.54	0	0	0	mmu-miR-1247	#DIV/0!	#DIV/0!	#DIV/0!	#DIV/0!
mmu-miR-129-1-3p	0	0	0	0	0	0	0	0	mmu-miR-129-1-3p	2	0	0	0	0	0	0	0	mmu-miR-129-1-3p	0	0	0	0	0	0	0	0	mmu-miR-129-1-3p	1.64	0	0	0	0	0	0	0	mmu-miR-129-1-3p	0.82	0	0	0	0	0	0	0	mmu-miR-129-1-3p	#DIV/0!	#DIV/0!	#DIV/0!	#DIV/0!
mmu-miR-133a.1	0	0	0	0	0	0	0	0	mmu-miR-133a.1	0	0	0	0	0	0	57	0	mmu-miR-133a.1	0	0	0	0	0	0	0	0	mmu-miR-133a.1	0	0	0	0	0	0	78.66	0	mmu-miR-133a.1	0	0	0	0	0	0	39.33	0	mmu-miR-133a.1	#DIV/0!	#DIV/0!	#DIV/0!	#DIV/0!
mmu-miR-135b	0	0	0	0	0	0	0	0	mmu-miR-135b	181	0	0	0	1	0	2	0	mmu-miR-135b	0	0	0	0	0	0	0	0	mmu-miR-135b	148.42	0	0	0	1.64	0	2.76	0	mmu-miR-135b	74.21	0	0	0	0.82	0	1.38	0	mmu-miR-135b	#DIV/0!	#DIV/0!	#DIV/0!	#DIV/0!
mmu-miR-138-1,mmu-miR-138-2	0	0	0	0	0	0	0	0	mmu-miR-138-1,mmu-miR-138-2	0	0	0	0	0	0	158	0	mmu-miR-138-1,mmu-miR-138-2	0	0	0	0	0	0	0	0	mmu-miR-138-1,mmu-miR-138-2	0	0	0	0	0	0	218.04	0	mmu-miR-138-1,mmu-miR-138-2	0	0	0	0	0	0	109.02	0	mmu-miR-138-1,mmu-miR-138-2	#DIV/0!	#DIV/0!	#DIV/0!	#DIV/0!
mmu-miR-142-3p	0	0	0	0	0	0	0	0	mmu-miR-142-3p	17	0	0	0	0	146	0	0	mmu-miR-142-3p	0	0	0	0	0	0	0	0	mmu-miR-142-3p	13.94	0	0	0	0	391.28	0	0	mmu-miR-142-3p	6.97	0	0	0	0	195.64	0	0	mmu-miR-142-3p	#DIV/0!	#DIV/0!	#DIV/0!	#DIV/0!
mmu-miR-142-5p	0	0	0	0	133	0	0	0	mmu-miR-142-5p	0	0	0	0	0	0	0	0	mmu-miR-142-5p	0	0	0	0	228.76	0	0	0	mmu-miR-142-5p	0	0	0	0	0	0	0	0	mmu-miR-142-5p	0	0	0	0	114.38	0	0	0	mmu-miR-142-5p	#DIV/0!	#DIV/0!	#DIV/0!	#DIV/0!
mmu-miR-150	0	0	0	0	45	0	0	0	mmu-miR-150	0	0	0	0	0	0	0	0	mmu-miR-150	0	0	0	0	77.4	0	0	0	mmu-miR-150	0	0	0	0	0	0	0	0	mmu-miR-150	0	0	0	0	38.7	0	0	0	mmu-miR-150	#DIV/0!	#DIV/0!	#DIV/0!	#DIV/0!
mmu-miR-18b	0	0	0	0	0	0	1	0	mmu-miR-18b	0	0	0	0	0	0	0	1	mmu-miR-18b	0	0	0	0	0	0	1.2	0	mmu-miR-18b	0	0	0	0	0	0	0	1.53	mmu-miR-18b	0	0	0	0	0	0	0.6	0.765	mmu-miR-18b	#DIV/0!	#DIV/0!	#DIV/0!	#DIV/0!
mmu-miR-190b	0	0	0	0	0	0	0	0	mmu-miR-190b	77	0	0	0	1	0	162	0	mmu-miR-190b	0	0	0	0	0	0	0	0	mmu-miR-190b	63.14	0	0	0	1.64	0	223.56	0	mmu-miR-190b	31.57	0	0	0	0.82	0	111.78	0	mmu-miR-190b	#DIV/0!	#DIV/0!	#DIV/0!	#DIV/0!
mmu-miR-1933-5p	0	0	0	0	68	0	0	0	mmu-miR-1933-5p	0	0	0	0	0	0	0	0	mmu-miR-1933-5p	0	0	0	0	116.96	0	0	0	mmu-miR-1933-5p	0	0	0	0	0	0	0	0	mmu-miR-1933-5p	0	0	0	0	58.48	0	0	0	mmu-miR-1933-5p	#DIV/0!	#DIV/0!	#DIV/0!	#DIV/0!
mmu-miR-1943	0	0	0	0	0	0	0	0	mmu-miR-1943	66	0	0	0	0	0	0	0	mmu-miR-1943	0	0	0	0	0	0	0	0	mmu-miR-1943	54.12	0	0	0	0	0	0	0	mmu-miR-1943	27.06	0	0	0	0	0	0	0	mmu-miR-1943	#DIV/0!	#DIV/0!	#DIV/0!	#DIV/0!
mmu-miR-203	0	0	0	0	0	11	0	0	mmu-miR-203	0	0	0	0	0	0	0	0	mmu-miR-203	0	0	0	0	0	21.89	0	0	mmu-miR-203	0	0	0	0	0	0	0	0	mmu-miR-203	0	0	0	0	0	10.945	0	0	mmu-miR-203	#DIV/0!	#DIV/0!	#DIV/0!	#DIV/0!
mmu-miR-205	0	0	0	0	0	0	0	0	mmu-miR-205	150	0	0	0	1	0	0	0	mmu-miR-205	0	0	0	0	0	0	0	0	mmu-miR-205	123	0	0	0	1.64	0	0	0	mmu-miR-205	61.5	0	0	0	0.82	0	0	0	mmu-miR-205	#DIV/0!	#DIV/0!	#DIV/0!	#DIV/0!
mmu-miR-212-3p	0	0	0	0	0	0	0	0	mmu-miR-212-3p	92	0	0	0	0	0	0	79	mmu-miR-212-3p	0	0	0	0	0	0	0	0	mmu-miR-212-3p	75.44	0	0	0	0	0	0	120.87	mmu-miR-212-3p	37.72	0	0	0	0	0	0	60.435	mmu-miR-212-3p	#DIV/0!	#DIV/0!	#DIV/0!	#DIV/0!
mmu-miR-218-2,mmu-miR-218-1	0	0	0	0	49	0	0	0	mmu-miR-218-2,mmu-miR-218-1	557	0	0	0	0	0	0	0	mmu-miR-218-2,mmu-miR-218-1	0	0	0	0	84.28	0	0	0	mmu-miR-218-2,mmu-miR-218-1	456.74	0	0	0	0	0	0	0	mmu-miR-218-2,mmu-miR-218-1	228.37	0	0	0	42.14	0	0	0	mmu-miR-218-2,mmu-miR-218-1	#DIV/0!	#DIV/0!	#DIV/0!	#DIV/0!
mmu-miR-219-1	2	0	0	0	43	0	0	0	mmu-miR-219-1	98	1	0	0	0	1	141	0	mmu-miR-219-1	2	0	0	0	73.96	0	0	0	mmu-miR-219-1	80.36	1.18	0	0	0	2.68	194.58	0	mmu-miR-219-1	41.18	0.59	0	0	36.98	1.34	97.29	0	mmu-miR-219-1	#DIV/0!	#DIV/0!	#DIV/0!	#DIV/0!
mmu-miR-219-2-5p	14	0	0	0	0	0	0	0	mmu-miR-219-2-5p	100	0	0	0	0	0	0	0	mmu-miR-219-2-5p	14	0	0	0	0	0	0	0	mmu-miR-219-2-5p	82	0	0	0	0	0	0	0	mmu-miR-219-2-5p	48	0	0	0	0	0	0	0	mmu-miR-219-2-5p	#DIV/0!	#DIV/0!	#DIV/0!	#DIV/0!
mmu-miR-296-3p	0	0	0	0	0	0	0	0	mmu-miR-296-3p	137	2	0	0	0	0	0	0	mmu-miR-296-3p	0	0	0	0	0	0	0	0	mmu-miR-296-3p	112.34	2.36	0	0	0	0	0	0	mmu-miR-296-3p	56.17	1.18	0	0	0	0	0	0	mmu-miR-296-3p	#DIV/0!	#DIV/0!	#DIV/0!	#DIV/0!
mmu-miR-296-5p	0	0	0	0	0	0	0	0	mmu-miR-296-5p	56	0	0	0	0	0	0	0	mmu-miR-296-5p	0	0	0	0	0	0	0	0	mmu-miR-296-5p	45.92	0	0	0	0	0	0	0	mmu-miR-296-5p	22.96	0	0	0	0	0	0	0	mmu-miR-296-5p	#DIV/0!	#DIV/0!	#DIV/0!	#DIV/0!
mmu-miR-3058	0	0	0	0	0	0	0	0	mmu-miR-3058	86	0	0	0	0	0	0	0	mmu-miR-3058	0	0	0	0	0	0	0	0	mmu-miR-3058	70.52	0	0	0	0	0	0	0	mmu-miR-3058	35.26	0	0	0	0	0	0	0	mmu-miR-3058	#DIV/0!	#DIV/0!	#DIV/0!	#DIV/0!
mmu-miR-3067	0	0	0	0	24	0	0	0	mmu-miR-3067	0	0	0	0	0	0	0	0	mmu-miR-3067	0	0	0	0	41.28	0	0	0	mmu-miR-3067	0	0	0	0	0	0	0	0	mmu-miR-3067	0	0	0	0	20.64	0	0	0	mmu-miR-3067	#DIV/0!	#DIV/0!	#DIV/0!	#DIV/0!
mmu-miR-3074-1-3p	0	0	0	0	0	0	0	0	mmu-miR-3074-1-3p	0	0	0	0	0	0	116	0	mmu-miR-3074-1-3p	0	0	0	0	0	0	0	0	mmu-miR-3074-1-3p	0	0	0	0	0	0	160.08	0	mmu-miR-3074-1-3p	0	0	0	0	0	0	80.04	0	mmu-miR-3074-1-3p	#DIV/0!	#DIV/0!	#DIV/0!	#DIV/0!
mmu-miR-3079-5p	0	0	0	0	0	0	0	0	mmu-miR-3079-5p	0	0	0	69	0	0	0	0	mmu-miR-3079-5p	0	0	0	0	0	0	0	0	mmu-miR-3079-5p	0	0	0	76.59	0	0	0	0	mmu-miR-3079-5p	0	0	0	38.295	0	0	0	0	mmu-miR-3079-5p	#DIV/0!	#DIV/0!	#DIV/0!	#DIV/0!
mmu-miR-3089-3p	0	0	0	0	0	0	0	0	mmu-miR-3089-3p	43	0	0	0	0	0	64	0	mmu-miR-3089-3p	0	0	0	0	0	0	0	0	mmu-miR-3089-3p	35.26	0	0	0	0	0	88.32	0	mmu-miR-3089-3p	17.63	0	0	0	0	0	44.16	0	mmu-miR-3089-3p	#DIV/0!	#DIV/0!	#DIV/0!	#DIV/0!
mmu-miR-3096-5p	0	0	0	0	0	0	0	0	mmu-miR-3096-5p	0	0	0	0	0	0	0	62	mmu-miR-3096-5p	0	0	0	0	0	0	0	0	mmu-miR-3096-5p	0	0	0	0	0	0	0	94.86	mmu-miR-3096-5p	0	0	0	0	0	0	0	47.43	mmu-miR-3096-5p	#DIV/0!	#DIV/0!	#DIV/0!	#DIV/0!
mmu-miR-3098-3p	0	0	0	0	0	0	0	0	mmu-miR-3098-3p	78	0	0	0	0	1	60	69	mmu-miR-3098-3p	0	0	0	0	0	0	0	0	mmu-miR-3098-3p	63.96	0	0	0	0	2.68	82.8	105.57	mmu-miR-3098-3p	31.98	0	0	0	0	1.34	41.4	52.785	mmu-miR-3098-3p	#DIV/0!	#DIV/0!	#DIV/0!	#DIV/0!
mmu-miR-3098-5p	0	0	0	0	0	0	0	0	mmu-miR-3098-5p	52	0	0	0	0	0	0	0	mmu-miR-3098-5p	0	0	0	0	0	0	0	0	mmu-miR-3098-5p	42.64	0	0	0	0	0	0	0	mmu-miR-3098-5p	21.32	0	0	0	0	0	0	0	mmu-miR-3098-5p	#DIV/0!	#DIV/0!	#DIV/0!	#DIV/0!
mmu-miR-3102.1	0	0	0	0	0	0	0	0	mmu-miR-3102.1	99	0	0	0	0	0	0	0	mmu-miR-3102.1	0	0	0	0	0	0	0	0	mmu-miR-3102.1	81.18	0	0	0	0	0	0	0	mmu-miR-3102.1	40.59	0	0	0	0	0	0	0	mmu-miR-3102.1	#DIV/0!	#DIV/0!	#DIV/0!	#DIV/0!
mmu-miR-331	0	0	0	0	0	0	0	0	mmu-miR-331	42	0	0	0	0	0	0	0	mmu-miR-331	0	0	0	0	0	0	0	0	mmu-miR-331	34.44	0	0	0	0	0	0	0	mmu-miR-331	17.22	0	0	0	0	0	0	0	mmu-miR-331	#DIV/0!	#DIV/0!	#DIV/0!	#DIV/0!
mmu-miR-335	0	0	0	0	45	0	0	0	mmu-miR-335	0	0	0	0	0	0	0	0	mmu-miR-335	0	0	0	0	77.4	0	0	0	mmu-miR-335	0	0	0	0	0	0	0	0	mmu-miR-335	0	0	0	0	38.7	0	0	0	mmu-miR-335	#DIV/0!	#DIV/0!	#DIV/0!	#DIV/0!
mmu-miR-34b-5p	0	0	0	0	0	0	0	282	mmu-miR-34b-5p	320	0	0	0	0	0	0	0	mmu-miR-34b-5p	0	0	0	0	0	0	0	282	mmu-miR-34b-5p	262.4	0	0	0	0	0	0	0	mmu-miR-34b-5p	131.2	0	0	0	0	0	0	141	mmu-miR-34b-5p	#DIV/0!	#DIV/0!	#DIV/0!	#DIV/0!
mmu-miR-379	0	0	0	0	0	0	0	0	mmu-miR-379	0	0	0	0	0	0	9	0	mmu-miR-379	0	0	0	0	0	0	0	0	mmu-miR-379	0	0	0	0	0	0	12.42	0	mmu-miR-379	0	0	0	0	0	0	6.21	0	mmu-miR-379	#DIV/0!	#DIV/0!	#DIV/0!	#DIV/0!
mmu-miR-381	0	0	0	0	0	249	0	0	mmu-miR-381	0	0	0	0	0	0	0	0	mmu-miR-381	0	0	0	0	0	495.51	0	0	mmu-miR-381	0	0	0	0	0	0	0	0	mmu-miR-381	0	0	0	0	0	247.755	0	0	mmu-miR-381	#DIV/0!	#DIV/0!	#DIV/0!	#DIV/0!
mmu-miR-450a-2-3p	0	0	0	0	0	0	0	0	mmu-miR-450a-2-3p	49	0	0	0	0	0	0	82	mmu-miR-450a-2-3p	0	0	0	0	0	0	0	0	mmu-miR-450a-2-3p	40.18	0	0	0	0	0	0	125.46	mmu-miR-450a-2-3p	20.09	0	0	0	0	0	0	62.73	mmu-miR-450a-2-3p	#DIV/0!	#DIV/0!	#DIV/0!	#DIV/0!
mmu-miR-450b-3p	0	0	0	0	0	136	0	0	mmu-miR-450b-3p	61	0	0	0	0	2	87	0	mmu-miR-450b-3p	0	0	0	0	0	270.64	0	0	mmu-miR-450b-3p	50.02	0	0	0	0	5.36	120.06	0	mmu-miR-450b-3p	25.01	0	0	0	0	138	60.03	0	mmu-miR-450b-3p	#DIV/0!	#DIV/0!	#DIV/0!	#DIV/0!
mmu-miR-451	0	0	0	0	0	0	0	0	mmu-miR-451	0	54	0	91	0	0	0	0	mmu-miR-451	0	0	0	0	0	0	0	0	mmu-miR-451	0	63.72	0	101.01	0	0	0	0	mmu-miR-451	0	31.86	0	50.505	0	0	0	0	mmu-miR-451	#DIV/0!	#DIV/0!	#DIV/0!	#DIV/0!
mmu-miR-455-5p	0	0	0	0	0	0	0	0	mmu-miR-455-5p	266	0	0	0	0	0	0	0	mmu-miR-455-5p	0	0	0	0	0	0	0	0	mmu-miR-455-5p	218.12	0	0	0	0	0	0	0	mmu-miR-455-5p	109.06	0	0	0	0	0	0	0	mmu-miR-455-5p	#DIV/0!	#DIV/0!	#DIV/0!	#DIV/0!
mmu-miR-466k	0	0	0	0	0	0	0	0	mmu-miR-466k	0	1	0	0	70	0	0	0	mmu-miR-466k	0	0	0	0	0	0	0	0	mmu-miR-466k	0	1.18	0	0	114.8	0	0	0	mmu-miR-466k	0	0.59	0	0	57.4	0	0	0	mmu-miR-466k	#DIV/0!	#DIV/0!	#DIV/0!	#DIV/0!
mmu-miR-466l-3p	0	0	0	0	0	0	0	0	mmu-miR-466l-3p	52	0	0	0	0	0	0	0	mmu-miR-466l-3p	0	0	0	0	0	0	0	0	mmu-miR-466l-3p	42.64	0	0	0	0	0	0	0	mmu-miR-466l-3p	21.32	0	0	0	0	0	0	0	mmu-miR-466l-3p	#DIV/0!	#DIV/0!	#DIV/0!	#DIV/0!
mmu-miR-491	0	0	0	0	50	0	0	0	mmu-miR-491	6	0	0	0	0	0	0	0	mmu-miR-491	0	0	0	0	86	0	0	0	mmu-miR-491	4.92	0	0	0	0	0	0	0	mmu-miR-491	2.46	0	0	0	43	0	0	0	mmu-miR-491	#DIV/0!	#DIV/0!	#DIV/0!	#DIV/0!
mmu-miR-676-5p	0	0	0	0	0	0	0	0	mmu-miR-676-5p	648	0	0	0	0	0	0	0	mmu-miR-676-5p	0	0	0	0	0	0	0	0	mmu-miR-676-5p	531.36	0	0	0	0	0	0	0	mmu-miR-676-5p	265.68	0	0	0	0	0	0	0	mmu-miR-676-5p	#DIV/0!	#DIV/0!	#DIV/0!	#DIV/0!
mmu-miR-700-3p	0	0	0	0	0	0	0	0	mmu-miR-700-3p	95	0	0	0	0	0	96	0	mmu-miR-700-3p	0	0	0	0	0	0	0	0	mmu-miR-700-3p	77.9	0	0	0	0	0	132.48	0	mmu-miR-700-3p	38.95	0	0	0	0	0	66.24	0	mmu-miR-700-3p	#DIV/0!	#DIV/0!	#DIV/0!	#DIV/0!
mmu-miR-700-5p	0	0	0	0	0	0	0	0	mmu-miR-700-5p	80	0	0	0	0	1	154	0	mmu-miR-700-5p	0	0	0	0	0	0	0	0	mmu-miR-700-5p	65.6	0	0	0	0	2.68	212.52	0	mmu-miR-700-5p	32.8	0	0	0	0	1.34	106.26	0	mmu-miR-700-5p	#DIV/0!	#DIV/0!	#DIV/0!	#DIV/0!
mmu-miR-701	0	0	0	0	0	0	0	0	mmu-miR-701	97	0	0	0	0	0	0	0	mmu-miR-701	0	0	0	0	0	0	0	0	mmu-miR-701	79.54	0	0	0	0	0	0	0	mmu-miR-701	39.77	0	0	0	0	0	0	0	mmu-miR-701	#DIV/0!	#DIV/0!	#DIV/0!	#DIV/0!
mmu-miR-760-5p	0	0	0	0	0	0	0	0	mmu-miR-760-5p	0	0	0	0	0	0	11	0	mmu-miR-760-5p	0	0	0	0	0	0	0	0	mmu-miR-760-5p	0	0	0	0	0	0	15.18	0	mmu-miR-760-5p	0	0	0	0	0	0	7.59	0	mmu-miR-760-5p	#DIV/0!	#DIV/0!	#DIV/0!	#DIV/0!
mmu-miR-878-5p	0	0	0	0	37	0	0	0	mmu-miR-878-5p	0	0	0	0	0	0	0	0	mmu-miR-878-5p	0	0	0	0	63.64	0	0	0	mmu-miR-878-5p	0	0	0	0	0	0	0	0	mmu-miR-878-5p	0	0	0	0	31.82	0	0	0	mmu-miR-878-5p	#DIV/0!	#DIV/0!	#DIV/0!	#DIV/0!
[truncated: 22 more columns]

## Sheet: Normalization factors
	Calculation of normalization factor for Library X:
			("Mapped to mm9 (U01 + R01)" for WT + mCherry, replicate 1) / ("Mapped to mm9 (U01 + R01)" for Library X)
	NORMALIZATION FACTORS:
		WT	KO
		mCherry	mCherry	hsDicer	IIIA/IIIB (D1320A/D1709A)	RNase IIIA (D1320A)	RNase IIIB (D1709A)	Helicase (K70A)	PAZ (YY971AA)
	Replicate 1	1	2.04093	1.22733	1.35343	1.72022	1.98893	1.19989	0.995675
	Replicate 2	0.815721	1.18449	0.945536	1.107	1.64409	2.68147	1.38441	1.53492
