# Supplementary material
Source: HighWire-hosted journal article supplement (doi:10.1101/rna.032680.112)
Supplement: SuppData3_SmallRNA-seq5pand3pmiRNAclassificationcopy.xlsx [file SuppData3_SmallRNA-seq5pand3pmiRNAclassificationcopy.xlsx]

## Sheet: Replicate 1 - All miRNAs
SUPPLEMENTARY DATA 3 Small RNA-seq 5p and 3p miRNA classification	RAW READS								NORMALIZED READS (See "Normalization Factors" sheet or Supplementary Table 1)
	WT	KO							WT	KO
miR	mCherry	mCherry	hsDicer	D1320A/D1709A	D1320A	D1709A	K70A	YY971AA	mCherry	mCherry	hsDicer	D1320A/D1709A	D1320A	D1709A	K70A	YY971AA
mmu-miR-22	3425400	32374	1750939	21000	3657	516430	1471524	1878924	3425400	66043	2.15365e+06	28350	6290.04	1.0277e+06	1.76583e+06	1878924
mmu-miR-21	1225052	37765	1181606	47051	87435	13665	1040599	413289	1225052	77040.6	1.45338e+06	63518.9	150388	27193.3	1.24872e+06	413289
mmu-let-7c-1,mmu-let-7c-2	489987	1261	295215	242	54247	1918	411328	73730	489987	2572.44	363114	326.7	93304.8	3816.82	493594	73730
mmu-miR-29b-2,mmu-miR-29b-1	358626	1432	634380	4731	1503	257037	371125	424824	358626	2921.28	780287	6386.85	2585.16	511504	445350	424824
mmu-let-7b	346171	846	132968	3718	31909	524	148551	55866	346171	1725.84	163551	5019.3	54883.5	1042.76	178261	55866
mmu-miR-125b-1,mmu-miR-125b-2	304611	650	114512	2177	8347	315	75084	200364	304611	1326	140850	2938.95	14356.8	626.85	90100.8	200364
mmu-let-7i	291624	835	188802	698	42882	583	173448	63540	291624	1703.4	232226	942.3	73757	1160.17	208138	63540
mmu-miR-26a-2,mmu-miR-26a-1	259334	637	78466	71	11375	283	88464	160653	259334	1299.48	96513.2	95.85	19565	563.17	106157	160653
mmu-let-7f-2,mmu-let-7f-1	179165	395	46796	38	11970	162	61003	7478	179165	805.8	57559.1	51.3	20588.4	322.38	73203.6	7478
mmu-miR-99b	171893	469	105423	107	72290	1656	293449	126896	171893	956.76	129670	144.45	124339	3295.44	352139	126896
mmu-miR-24-1,mmu-miR-24-2	159026	472	123766	99	535	88593	51043	44163	159026	962.88	152232	133.65	920.2	176300	61251.6	44163
mmu-let-7a-2,mmu-let-7a-1	123527	271	90748	74	6080	81	20657	26469	123527	552.84	111620	99.9	10457.6	161.19	24788.4	26469
mmu-miR-143	91935	278	38674	37	63	4209	52364	61349	91935	567.12	47569	49.95	108.36	8375.91	62836.8	61349
mmu-miR-30a	88237	305	43512	5094	14740	155	39453	75567	88237	622.2	53519.8	6876.9	25352.8	308.45	47343.6	75567
mmu-miR-30e	74000	251	63361	43	2528	105	40988	16981	74000	512.04	77934	58.05	4348.16	208.95	49185.6	16981
mmu-miR-30d	61503	230	38965	104	6496	105	30968	70859	61503	469.2	47926.9	140.4	11173.1	208.95	37161.6	70859
mmu-miR-16-2,mmu-miR-16-1	58487	126	21103	29	11930	228	27878	42093	58487	257.04	25956.7	39.15	20519.6	453.72	33453.6	42093
mmu-miR-199a-2-5p,mmu-miR-199a-1-5p	57518	148	13188	15	1761	247	28838	34375	57518	301.92	16221.2	20.25	3028.92	491.53	34605.6	34375
mmu-miR-148a	52218	129	7877	12	14	1766	3760	6484	52218	263.16	9688.71	16.2	24.08	3514.34	4512	6484
mmu-let-7e	49936	119	27030	18	2996	38	12345	78	49936	242.76	33246.9	24.3	5153.12	75.62	14814	78
mmu-miR-29a	45720	141	50495	41	165	5561	39434	128164	45720	287.64	62108.8	55.35	283.8	11066.4	47320.8	128164
mmu-miR-28-3p	44967	140	30439	18	98	9390	7787	29735	44967	285.6	37440	24.3	168.56	18686.1	9344.4	29735
mmu-miR-151-5p	40891	101	5462	3970	13635	147	34030	64101	40891	206.04	6718.26	5359.5	23452.2	292.53	40836	64101
mmu-miR-199a-2-3p,mmu-miR-199a-1-3p,mmu-miR-199b	40190	76	34	10	26	1178	17772	24156	40190	155.04	41.82	13.5	44.72	2344.22	21326.4	24156
mmu-miR-96	39332	166	84835	168	30239	923	53637	89844	39332	338.64	104347	226.8	52011.1	1836.77	64364.4	89844
mmu-miR-125a	34381	88	6020	11	949	114	43647	9910	34381	179.52	7404.6	14.85	1632.28	226.86	52376.4	9910
mmu-miR-130a	34146	93	15	5	55	8329	11581	17	34146	189.72	18.45	6.75	94.6	16574.7	13897.2	17
mmu-miR-322	32792	62	11700	12	938	17	3431	9	32792	126.48	14391	16.2	1613.36	33.83	4117.2	9
mmu-let-7d	31402	103	42423	26	5264	342	39495	3931	31402	210.12	52180.3	35.1	9054.08	680.58	47394	3931
mmu-miR-31	31071	179	95466	2346	60977	695	49369	47611	31071	365.16	117423	3167.1	104880	1383.05	59242.8	47611
mmu-miR-140-3p	27485	79	20079	16	22	627	11688	22134	27485	161.16	24697.2	21.6	37.84	1247.73	14025.6	22134
mmu-miR-26b	26214	51	17117	17	3203	117	41380	18522	26214	104.04	21053.9	22.95	5509.16	232.83	49656	18522
mmu-miR-872	24167	39	13	2	82	14	6423	8	24167	79.56	15.99	2.7	141.04	27.86	7707.6	8
mmu-miR-183	22089	120	66296	48	7304	91	34629	38056	22089	244.8	81544.1	64.8	12562.9	181.09	41554.8	38056
mmu-miR-100	21914	50	419	4	994	30	9051	7515	21914	102	515.37	5.4	1709.68	59.7	10861.2	7515
mmu-miR-328	21646	77	12232	2614	14	240	16288	8179	21646	157.08	15045.4	3528.9	24.08	477.6	19545.6	8179
mmu-miR-423-3p	21189	118	41029	41	59	11206	38818	40870	21189	240.72	50465.7	55.35	101.48	22299.9	46581.6	40870
mmu-miR-30c-1,mmu-miR-30c-2	20820	73	5918	13	1105	46	15020	15824	20820	148.92	7279.14	17.55	1900.6	91.54	18024	15824
mmu-miR-92a-1	18511	84	38584	33	92	15246	27276	47474	18511	171.36	47458.3	44.55	158.24	30339.5	32731.2	47474
mmu-miR-181a-1,mmu-miR-181a-2	18195	20919	21	1	1220	160	3017	2	18195	42674.8	25.83	1.35	2098.4	318.4	3620.4	2
mmu-miR-27b	17455	77	34946	19	10	1396	2819	7224	17455	157.08	42983.6	25.65	17.2	2778.04	3382.8	7224
mmu-miR-140-5p	17059	42	9	3	2785	48	15695	15	17059	85.68	11.07	4.05	4790.2	95.52	18834	15
mmu-miR-320	16596	44	8887	6	10	1470	12332	11028	16596	89.76	10931	8.1	17.2	2925.3	14798.4	11028
mmu-miR-7a-2,mmu-miR-7a-1	14497	57	44044	31	1934	678	20681	19755	14497	116.28	54174.1	41.85	3326.48	1349.22	24817.2	19755
mmu-miR-28-5p	14424	68	14153	12	2947	60	14769	65093	14424	138.72	17408.2	16.2	5068.84	119.4	17722.8	65093
mmu-miR-221	14224	44	6266	4	82	6483	9042	7970	14224	89.76	7707.18	5.4	141.04	12901.2	10850.4	7970
mmu-miR-25	13552	30	6	3	13	1699	17669	6008	13552	61.2	7.38	4.05	22.36	3381.01	21202.8	6008
mmu-miR-615	13255	31	6	1	0	0	8	0	13255	63.24	7.38	1.35	0	0	9.6	0
mmu-miR-182	12950	61	19504	13	7278	602	24756	13662	12950	124.44	23989.9	17.55	12518.2	1197.98	29707.2	13662
mmu-let-7g	12938	33	17385	18	830	30	12988	111	12938	67.32	21383.5	24.3	1427.6	59.7	15585.6	111
mmu-miR-674-5p	12888	28	14250	9	4867	14	6002	3075	12888	57.12	17527.5	12.15	8371.24	27.86	7202.4	3075
mmu-miR-423-5p	11683	42	10347	20	1855	18	716	6141	11683	85.68	12726.8	27	3190.6	35.82	859.2	6141
mmu-miR-193-3p	11618	30	19346	12	26	7639	5716	23731	11618	61.2	23795.6	16.2	44.72	15201.6	6859.2	23731
mmu-miR-149	9823	32	5743	7	4048	4	1	38	9823	65.28	7063.89	9.45	6962.56	7.96	1.2	38
mmu-miR-378	9703	75	60912	45	32	5151	40439	15658	9703	153	74921.8	60.75	55.04	10250.5	48526.8	15658
mmu-miR-224	9694	25	6155	6	492	1	0	2	9694	51	7570.65	8.1	846.24	1.99	0	2
mmu-miR-148b	9023	21	4	0	1	1611	6	11	9023	42.84	4.92	0	1.72	3205.89	7.2	11
mmu-miR-191	8896	33	16027	10	86	281	13910	552	8896	67.32	19713.2	13.5	147.92	559.19	16692	552
mmu-miR-186	8546	23	9	6	590	40	10565	22130	8546	46.92	11.07	8.1	1014.8	79.6	12678	22130
mmu-miR-214	8120	25	6924	2	3725	4	1	5357	8120	51	8516.52	2.7	6407	7.96	1.2	5357
mmu-miR-676-3p	7714	12	4	2	0	0	1	1	7714	24.48	4.92	2.7	0	0	1.2	1
mmu-miR-497	7486	7	3	1	598	11	2796	4	7486	14.28	3.69	1.35	1028.56	21.89	3355.2	4
mmu-miR-155	7019	30	16824	15	1748	30	7869	17907	7019	61.2	20693.5	20.25	3006.56	59.7	9442.8	17907
mmu-miR-196a-2,mmu-miR-196a-1	6851	48	31698	22	3756	298	9715	23100	6851	97.92	38988.5	29.7	6460.32	593.02	11658	23100
mmu-miR-27a	6642	13681	245	4	9	1547	4350	5833	6642	27909.2	301.35	5.4	15.48	3078.53	5220	5833
mmu-miR-185	6631	14	3	1	920	0	1	1	6631	28.56	3.69	1.35	1582.4	0	1.2	1
mmu-miR-139	5925	19	2	0	182	1	1	0	5925	38.76	2.46	0	313.04	1.99	1.2	0
mmu-miR-103-1,mmu-miR-103-2	5265	22	7090	4	10	391	13404	10	5265	44.88	8720.7	5.4	17.2	778.09	16084.8	10
mmu-miR-15a	5069	7	3	11	1977	11	3455	6635	5069	14.28	3.69	14.85	3400.44	21.89	4146	6635
mmu-miR-196b	5008	11	28	0	2527	431	5172	47	5008	22.44	34.44	0	4346.44	857.69	6206.4	47
mmu-miR-466h	4850	18	7152	5	223	2	1	2	4850	36.72	8796.96	6.75	383.56	3.98	1.2	2
mmu-miR-23b	4732	19	2	1	2	1739	9	0	4732	38.76	2.46	1.35	3.44	3460.61	10.8	0
mmu-miR-106b	4385	12	3	4	2017	21	5602	6605	4385	24.48	3.69	5.4	3469.24	41.79	6722.4	6605
mmu-miR-500	3966	11	2	1	6	159	5	6729	3966	22.44	2.46	1.35	10.32	316.41	6	6729
mmu-miR-129-1-5p	3926	7	0	0	1	0	0	0	3926	14.28	0	0	1.72	0	0	0
mmu-miR-98	3790	18	8501	8	2157	16	8112	58	3790	36.72	10456.2	10.8	3710.04	31.84	9734.4	58
mmu-miR-151-3p	3349	8	11	2	79	413	13691	11133	3349	16.32	13.53	2.7	135.88	821.87	16429.2	11133
mmu-miR-744	3339	8	8084	319	99	64	18314	25	3339	16.32	9943.32	430.65	170.28	127.36	21976.8	25
mmu-miR-210	3326	11	0	0	0	147	0	0	3326	22.44	0	0	0	292.53	0	0
mmu-miR-181b-2,mmu-miR-181b-1	2830	13	6415	4	406	8	3003	3	2830	26.52	7890.45	5.4	698.32	15.92	3603.6	3
mmu-miR-101a	2479	5	9	0	0	0	5	2	2479	10.2	11.07	0	0	0	6	2
mmu-miR-23a	2286	3	1	2	1	1460	6315	6	2286	6.12	1.23	2.7	1.72	2905.4	7578	6
mmu-miR-503	1654	6	2	1	455	1	0	1	1654	12.24	2.46	1.35	782.6	1.99	0	1
mmu-miR-126-3p	1221	12	6730	4	6	1364	11221	7844	1221	24.48	8277.9	5.4	10.32	2714.36	13465.2	7844
mmu-miR-664-5p	1126	1	0	0	143	0	1	1	1126	2.04	0	0	245.96	0	1.2	1
mmu-miR-340	1021	8	7084	7	0	2	1	0	1021	16.32	8713.32	9.45	0	3.98	1.2	0
mmu-miR-15b	956	6	3	4	5491	342	14135	8980	956	12.24	3.69	5.4	9444.52	680.58	16962	8980
mmu-miR-32	919	6	8687	4	1874	21	5660	6	919	12.24	10685	5.4	3223.28	41.79	6792	6
mmu-miR-193-5p	800	4	4	3	7044	27	9069	8394	800	8.16	4.92	4.05	12115.7	53.73	10882.8	8394
mmu-miR-99a	580	3	2	0	6901	1	23	17	580	6.12	2.46	0	11869.7	1.99	27.6	17
mmu-miR-1198-5p	235	7	6895	6	1262	6	2062	4	235	14.28	8480.85	8.1	2170.64	11.94	2474.4	4
mmu-miR-29c	46	0	31	0	0	1	26	388	46	0	38.13	0	0	1.99	31.2	388
mmu-miR-669f-5p	26	0	0	0	195	0	1	0	26	0	0	0	335.4	0	1.2	0
mmu-miR-7b	23	0	16	0	0	0	4	8	23	0	19.68	0	0	0	4.8	8
mmu-miR-92a-2	22	1	2212	1	7	2023	17	8939	22	2.04	2720.76	1.35	12.04	4025.77	20.4	8939
mmu-miR-33	20	1	1	0	1789	2	5	3908	20	2.04	1.23	0	3077.08	3.98	6	3908
mmu-miR-219-2-5p	14	0	0	0	0	0	0	0	14	0	0	0	0	0	0	0
mmu-miR-466c-2-3p,mmu-miR-466b-2-3p,mmu-miR-466b-6-3p,mmu-miR-466b-8-3p,mmu-miR-466b-4-3p,mmu-miR-466b-1-3p,mmu-miR-466c-3p	12	1	0	0	0	221	0	0	12	2.04	0	0	0	439.79	0	0
mmu-miR-17	5	9	16938	16	1352	12	2759	8233	5	18.36	20833.7	21.6	2325.44	23.88	3310.8	8233
mmu-miR-10b	4	15951	4979	4	1062	29	8811	7336	4	32540	6124.17	5.4	1826.64	57.71	10573.2	7336
mmu-miR-206	4	6	3	2	18	4320	10988	18037	4	12.24	3.69	2.7	30.96	8596.8	13185.6	18037
mmu-miR-652	3	3	2	0	15	1231	9157	4971	3	6.12	2.46	0	25.8	2449.69	10988.4	4971
mmu-miR-181d	2	0	3	0	0	0	2	0	2	0	3.69	0	0	0	2.4	0
mmu-miR-101b	2	7	9100	4	6	409	2060	3	2	14.28	11193	5.4	10.32	813.91	2472	3
mmu-miR-93	2	9	8591	6	719	87	26460	19	2	18.36	10566.9	8.1	1236.68	173.13	31752	19
mmu-miR-195	2	0	8	0	107	0	0	6	2	0	9.84	0	184.04	0	0	6
mmu-miR-145	2	2	7181	5	81	1	4	3	2	4.08	8832.63	6.75	139.32	1.99	4.8	3
mmu-miR-219-1	2	0	0	0	43	0	0	0	2	0	0	0	73.96	0	0	0
mmu-miR-1964-3p	2	2	3746	1	0	0	0	0	2	4.08	4607.58	1.35	0	0	0	0
mmu-miR-222	1	0	4	0	0	200	2	0	1	0	4.92	0	0	398	2.4	0
mmu-miR-330-5p	1	0	2	0	1242	2	8	5297	1	0	2.46	0	2136.24	3.98	9.6	5297
mmu-miR-669b,mmu-miR-669m-2,mmu-miR-669m-1	1	0	0	1	321	12	4530	4	1	0	0	1.35	552.12	23.88	5436	4
mmu-miR-146a	1	0	0	0	187	275	285	0	1	0	0	0	321.64	547.25	342	0
mmu-miR-107	1	0	6533	0	0	0	3	0	1	0	8035.59	0	0	0	3.6	0
mmu-miR-146b	1	0	1	0	246	11	4172	3	1	0	1.23	0	423.12	21.89	5006.4	3
mmu-miR-3068	1	2	8360	3	966	16	6780	6	1	4.08	10282.8	4.05	1661.52	31.84	8136	6
mmu-miR-361	1	0	0	0	835	10	3503	4	1	0	0	0	1436.2	19.9	4203.6	4
mmu-miR-467d	1	0	19	0	59	0	0	0	1	0	23.37	0	101.48	0	0	0
mmu-miR-350	1	0	0	0	1	697	0	0	1	0	0	0	1.72	1387.03	0	0
mmu-miR-30b	1	0	0	0	855	0	0	0	1	0	0	0	1470.6	0	0	0
mmu-miR-449a	1	0	3	0	104	0	1	9821	1	0	3.69	0	178.88	0	1.2	9821
mmu-miR-365-2,mmu-miR-365-1	1	0	0	0	3	1849	0	1	1	0	0	0	5.16	3679.51	0	1
mmu-miR-1-2-as	0	0	0	0	0	209	0	0	0	0	0	0	0	415.91	0	0
mmu-miR-1981-5p	0	0	0	0	54	0	0	0	0	0	0	0	92.88	0	0	0
mmu-miR-674-3p	0	0	1	0	2	994	0	0	0	0	1.23	0	3.44	1978.06	0	0
mmu-miR-294	0	0	0	0	0	1149	1	0	0	0	0	0	0	2286.51	1.2	0
mmu-miR-132-3p	0	2	1	1	6	973	2986	6960	0	4.08	1.23	1.35	10.32	1936.27	3583.2	6960
mmu-miR-342	0	0	0	0	1	589	0	0	0	0	0	0	1.72	1172.11	0	0
mmu-miR-542	0	0	0	0	0	200	0	0	0	0	0	0	0	398	0	0
mmu-miR-1198-3p	0	0	0	0	0	363	0	2	0	0	0	0	0	722.37	0	2
mmu-miR-1955-5p	0	0	0	0	142	0	0	2	0	0	0	0	244.24	0	0	2
mmu-miR-34a	0	0	0	0	304	2	680	1	0	0	0	0	522.88	3.98	816	1
mmu-miR-152	0	0	0	0	0	134	0	0	0	0	0	0	0	266.66	0	0
mmu-miR-877-5p	0	0	0	0	0	0	8	0	0	0	0	0	0	0	9.6	0
mmu-miR-466c-1-5p,mmu-miR-466c-2-5p	0	0	0	0	103	0	0	0	0	0	0	0	177.16	0	0	0
mmu-miR-297b-5p	0	0	1	0	212	0	3	0	0	0	1.23	0	364.64	0	3.6	0
mmu-miR-106a	0	0	1	0	0	0	0	1	0	0	1.23	0	0	0	0	1
mmu-miR-297a-5-5p,mmu-miR-297a-4-5p,mmu-miR-297a-3-5p	0	0	0	0	495	0	0	0	0	0	0	0	851.4	0	0	0
mmu-miR-326	0	0	0	0	0	170	0	0	0	0	0	0	0	338.3	0	0
mmu-miR-218-2,mmu-miR-218-1	0	0	0	0	49	0	0	0	0	0	0	0	84.28	0	0	0
mmu-miR-532-5p	0	4	7586	3699	459	876	1	50	0	8.16	9330.78	4993.65	789.48	1743.24	1.2	50
mmu-miR-192	0	0	0	0	4	0	0	38	0	0	0	0	6.88	0	0	38
mmu-miR-18a	0	0	174	1	1253	21	8948	7	0	0	214.02	1.35	2155.16	41.79	10737.6	7
mmu-miR-450b-5p	0	0	0	0	312	0	0	0	0	0	0	0	536.64	0	0	0
mmu-miR-34c	0	2	1	3	84	0	1	6725	0	4.08	1.23	4.05	144.48	0	1.2	6725
mmu-miR-450a-2-5p	0	0	0	0	19	0	0	0	0	0	0	0	32.68	0	0	0
mmu-miR-669a-13-3p,mmu-miR-669a-8-3p,mmu-miR-669a-7-3p,mmu-miR-669a-9-3p,mmu-miR-669a-4-3p,mmu-miR-669a-6-3p,mmu-miR-669a-12-3p,mmu-miR-669o-3p,mmu-miR-669a-11-3p	0	0	0	0	0	463	0	0	0	0	0	0	0	921.37	0	0
mmu-miR-669o-5p	0	0	0	0	163	0	0	0	0	0	0	0	280.36	0	0	0
mmu-miR-297c-5p	0	0	0	0	112	0	0	0	0	0	0	0	192.64	0	0	0
mmu-miR-450b-3p	0	0	0	0	0	136	0	0	0	0	0	0	0	270.64	0	0
mmu-miR-130b-5p	0	2	2	3	1051	15	1715	16255	0	4.08	2.46	4.05	1807.72	29.85	2058	16255
mmu-miR-669a-13-5p,mmu-miR-669a-12-5p,mmu-miR-669a-4-5p,mmu-miR-669p-2,mmu-miR-669a-11-5p,mmu-miR-669p-1,mmu-miR-669a-7-5p,mmu-miR-669a-9-5p,mmu-miR-669a-8-5p,mmu-miR-669a-10-5p,mmu-miR-669a-2-5p,mmu-miR-669a-6-5p,mmu-miR-669a-1-5p,mmu-miR-669a-3-5p,mmu-miR-669a-5-5p	0	0	0	0	1428	11	3616	3	0	0	0	0	2456.16	21.89	4339.2	3
mmu-miR-34b-3p	0	0	0	0	0	360	0	0	0	0	0	0	0	716.4	0	0
mmu-miR-20a	0	0	9	0	1406	0	1	10	0	0	11.07	0	2418.32	0	1.2	10
mmu-miR-34b-5p	0	0	0	0	0	0	0	282	0	0	0	0	0	0	0	282
mmu-miR-664-3p	0	0	0	0	0	297	0	0	0	0	0	0	0	591.03	0	0
mmu-miR-466p-5p,mmu-miR-466a-5p	0	0	0	0	407	0	1	0	0	0	0	0	700.04	0	1.2	0
mmu-miR-470-5p	0	0	0	0	27	0	0	0	0	0	0	0	46.44	0	0	0
mmu-miR-425	0	0	74	0	1174	0	1	0	0	0	91.02	0	2019.28	0	1.2	0
mmu-miR-203	0	0	0	0	0	11	0	0	0	0	0	0	0	21.89	0	0
mmu-miR-150	0	0	0	0	45	0	0	0	0	0	0	0	77.4	0	0	0
mmu-miR-1930	0	0	0	0	56	0	0	0	0	0	0	0	96.32	0	0	0
mmu-miR-19b-1,mmu-miR-19b-2	0	2	1186	1	1	2372	1	0	0	4.08	1458.78	1.35	1.72	4720.28	1.2	0
mmu-miR-130b-3p	0	0	2	1	72	1332	5373	7	0	0	2.46	1.35	123.84	2650.68	6447.6	7
mmu-miR-501-5p	0	0	0	0	102	0	0	0	0	0	0	0	175.44	0	0	0
mmu-miR-381	0	0	0	0	0	249	0	0	0	0	0	0	0	495.51	0	0
mmu-miR-467c	0	6	6763	2	1170	1	0	0	0	12.24	8318.49	2.7	2012.4	1.99	0	0
mmu-miR-1189	0	0	0	0	0	258	0	0	0	0	0	0	0	513.42	0	0
mmu-miR-193b	0	0	0	0	0	889	0	0	0	0	0	0	0	1769.11	0	0
mmu-miR-532-3p	0	0	0	0	0	172	0	0	0	0	0	0	0	342.28	0	0
mmu-miR-10a	0	5	12	0	1	0	1	4	0	10.2	14.76	0	1.72	0	1.2	4
mmu-miR-671	0	0	0	0	1902	2	1	0	0	0	0	0	3271.44	3.98	1.2	0
mmu-miR-132-5p	0	1	0	0	237	0	0	0	0	2.04	0	0	407.64	0	0	0
mmu-miR-466b-1-5p,mmu-miR-466b-7-5p,mmu-miR-466b-3-5p,mmu-miR-466b-4-5p,mmu-miR-466b-6-5p,mmu-miR-466e-5p,mmu-miR-466b-8-5p,mmu-miR-466b-2-5p,mmu-miR-466o-5p	0	0	0	0	227	0	0	0	0	0	0	0	390.44	0	0	0
mmu-miR-1964-5p	0	0	0	0	13	0	0	0	0	0	0	0	22.36	0	0	0
mmu-miR-19a	0	1	0	0	3	1205	0	0	0	2.04	0	0	5.16	2397.95	0	0
mmu-miR-92b	0	0	0	0	0	3	2	23	0	0	0	0	0	5.97	2.4	23
mmu-miR-324	0	1	0	0	487	3	1676	1	0	2.04	0	0	837.64	5.97	2011.2	1
mmu-miR-3067	0	0	0	0	24	0	0	0	0	0	0	0	41.28	0	0	0
mmu-miR-297c-3p,mmu-miR-297a-4-3p,mmu-miR-297b-3p,mmu-miR-297a-3-3p	0	0	0	0	1	343	0	0	0	0	0	0	1.72	682.57	0	0
mmu-miR-491	0	0	0	0	50	0	0	0	0	0	0	0	86	0	0	0
mmu-miR-18b	0	0	0	0	0	0	1	0	0	0	0	0	0	0	1.2	0
mmu-miR-3057-5p	0	0	1	0	261	0	0	0	0	0	1.23	0	448.92	0	0	0
mmu-miR-212-5p	0	0	0	0	266	0	3	1	0	0	0	0	457.52	0	3.6	1
mmu-miR-466f-1,mmu-miR-466f-3,mmu-miR-466f-2	0	0	0	0	51	0	0	0	0	0	0	0	87.72	0	0	0
mmu-miR-501-3p	0	0	0	0	1	1	778	1	0	0	0	0	1.72	1.99	933.6	1
mmu-miR-467a-5,mmu-miR-467a-4,mmu-miR-467a-3,mmu-miR-467a-9,mmu-miR-467a,mmu-miR-467a-8,mmu-miR-467a-2,mmu-miR-467a-7,mmu-miR-467a-10,mmu-miR-467b,mmu-miR-467a-6,mmu-miR-467a-1	0	1	0	0	2010	0	0	0	0	2.04	0	0	3457.2	0	0	0
mmu-miR-20b	0	0	10	0	1	0	1	15	0	0	12.3	0	1.72	0	1.2	15
mmu-miR-466d-5p,mmu-miR-466n-5p	0	0	0	0	246	0	0	0	0	0	0	0	423.12	0	0	0
mmu-miR-142-5p	0	0	0	0	133	0	0	0	0	0	0	0	228.76	0	0	0
mmu-miR-1982	0	0	0	0	0	1	0	0	0	0	0	0	0	1.99	0	0
mmu-miR-188	0	0	0	0	43	0	0	0	0	0	0	0	73.96	0	0	0
mmu-miR-128-2,mmu-miR-128-1	0	0	1	0	0	166	0	0	0	0	1.23	0	0	330.34	0	0
mmu-miR-669e	0	0	0	0	30	0	0	0	0	0	0	0	51.6	0	0	0
mmu-miR-669a-1-3p	0	0	0	0	0	1	0	0	0	0	0	0	0	1.99	0	0
mmu-miR-345-5p	0	0	0	0	46	0	0	0	0	0	0	0	79.12	0	0	0
mmu-miR-878-5p	0	0	0	0	37	0	0	0	0	0	0	0	63.64	0	0	0
mmu-miR-669f-3p	0	0	0	0	1	534	0	0	0	0	0	0	1.72	1062.66	0	0
mmu-miR-1933-5p	0	0	0	0	68	0	0	0	0	0	0	0	116.96	0	0	0
mmu-miR-374	0	1	0	0	1328	0	0	0	0	2.04	0	0	2284.16	0	0	0
mmu-miR-351	0	0	0	0	0	7	1867	2	0	0	0	0	0	13.93	2240.4	2
mmu-miR-669d-2,mmu-miR-669d	0	0	0	0	48	0	0	0	0	0	0	0	82.56	0	0	0
mmu-miR-1247	0	0	0	0	139	0	0	0	0	0	0	0	239.08	0	0	0
mmu-miR-335	0	0	0	0	45	0	0	0	0	0	0	0	77.4	0	0	0
mmu-miR-669l	0	0	0	0	67	1	0	1	0	0	0	0	115.24	1.99	0	1

## Sheet: Replicate 2 - All miRNAs
	RAW READS								NORMALIZED READS (See "Normalization Factors" sheet or Supplementary Table 1)
	WT	KO							WT	KO
miR	mCherry	mCherry	hsDicer	D1320A/D1709A	D1320A	D1709A	K70A	YY971AA	mCherry	mCherry	hsDicer	D1320A/D1709A	D1320A	D1709A	K70A	YY971AA
mmu-let-7a-2,mmu-let-7a-1	33033	177	10088	93	777	27	4964	3012	27087.1	208.86	9583.6	103.23	1274.28	72.36	6850.32	4608.36
mmu-let-7b	113786	388	38101	409	8410	294	17094	3157	93304.5	457.84	36195.9	453.99	13792.4	787.92	23589.7	4830.21
mmu-let-7c-1,mmu-let-7c-2	217184	1099	89109	733	10440	172	36883	8469	178091	1296.82	84653.6	813.63	17121.6	460.96	50898.5	12957.6
mmu-let-7d	23606	93	11557	26	1267	35	7476	1322	19356.9	109.74	10979.1	28.86	2077.88	93.8	10316.9	2022.66
mmu-let-7e	15842	110	5190	24	753	17	3222	234	12990.4	129.8	4930.5	26.64	1234.92	45.56	4446.36	358.02
mmu-let-7f-1,mmu-let-7f-2	36167	131	12372	88	1938	145	7718	1958	29656.9	154.58	11753.4	97.68	3178.32	388.6	10650.8	2995.74
mmu-let-7g	11440	15	3231	9	103	12	2736	2271	9380.8	17.7	3069.45	9.99	168.92	32.16	3775.68	3474.63
mmu-let-7i	116628	409	53814	460	11949	264	49149	7920	95635	482.62	51123.3	510.6	19596.4	707.52	67825.6	12117.6
mmu-miR-1-2-as	28	0	0	0	0	0	0	0	22.96	0	0	0	0	0	0	0
mmu-miR-100	7147	59	951	5	161	3	1171	469	5860.54	69.62	903.45	5.55	264.04	8.04	1615.98	717.57
mmu-miR-101a	663	4	156	0	0	3	239	6	543.66	4.72	148.2	0	0	8.04	329.82	9.18
mmu-miR-101b	2996	2	1353	0	1	633	2449	611	2456.72	2.36	1285.35	0	1.64	1696.44	3379.62	934.83
mmu-miR-103-1,mmu-miR-103-2	1680	4	835	2	0	11	1513	82	1377.6	4.72	793.25	2.22	0	29.48	2087.94	125.46
mmu-miR-106a	0	0	45	0	0	1	1	0	0	0	42.75	0	0	2.68	1.38	0
mmu-miR-106b	5322	53	2012	179	751	16	2697	753	4364.04	62.54	1911.4	198.69	1231.64	42.88	3721.86	1152.09
mmu-miR-107	449	0	143	3	0	0	69	21	368.18	0	135.85	3.33	0	0	95.22	32.13
mmu-miR-10a	1622	0	0	0	0	0	0	1	1330.04	0	0	0	0	0	0	1.53
mmu-miR-10b	56	0	152	0	32	3	646	7	45.92	0	144.4	0	52.48	8.04	891.48	10.71
mmu-miR-1189	23	0	83	1	0	43	245	87	18.86	0	78.85	1.11	0	115.24	338.1	133.11
mmu-miR-1198-3p	0	0	74	3	0	485	80	50	0	0	70.3	3.33	0	1299.8	110.4	76.5
mmu-miR-1198-5p	1704	3	1252	5	786	2	1437	592	1397.28	3.54	1189.4	5.55	1289.04	5.36	1983.06	905.76
mmu-miR-122	0	0	0	71	0	0	0	0	0	0	0	78.81	0	0	0	0
mmu-miR-125a	57041	234	16441	128	409	220	28423	3262	46773.6	276.12	15618.9	142.08	670.76	589.6	39223.7	4990.86
mmu-miR-125b-2,mmu-miR-125b-1	205373	623	32887	298	2424	207	44569	22022	168406	735.14	31242.6	330.78	3975.36	554.76	61505.2	33693.7
mmu-miR-126-3p	4781	4	946	2	0	458	1195	666	3920.42	4.72	898.7	2.22	0	1227.44	1649.1	1018.98
mmu-miR-126-5p	0	1	38	0	0	0	0	0	0	1.18	36.1	0	0	0	0	0
mmu-miR-128-1,mmu-miR-128-2	2760	6	619	3	1	93	1292	322	2263.2	7.08	588.05	3.33	1.64	249.24	1782.96	492.66
mmu-miR-129-1-3p	2	0	0	0	0	0	0	0	1.64	0	0	0	0	0	0	0
mmu-miR-129-1-5p	12751	46	412	4	58	2	124	224	10455.8	54.28	391.4	4.44	95.12	5.36	171.12	342.72
mmu-miR-129-2	3381	0	95	0	0	0	64	21	2772.42	0	90.25	0	0	0	88.32	32.13
mmu-miR-1306	609	0	202	0	103	2	462	219	499.38	0	191.9	0	168.92	5.36	637.56	335.07
mmu-miR-130a	94637	322	9992	38	15	1883	11547	6166	77602.3	379.96	9492.4	42.18	24.6	5046.44	15934.9	9433.98
mmu-miR-130b-3p	2886	2	315	1	1	200	505	349	2366.52	2.36	299.25	1.11	1.64	536	696.9	533.97
mmu-miR-130b-5p	645	0	63	0	208	103	390	114	528.9	0	59.85	0	341.12	276.04	538.2	174.42
mmu-miR-132-3p	415	3	415	3	0	5	551	622	340.3	3.54	394.25	3.33	0	13.4	760.38	951.66
mmu-miR-132-5p	147	1	119	2	0	0	318	71	120.54	1.18	113.05	2.22	0	0	438.84	108.63
mmu-miR-133a.1	0	0	0	0	0	0	57	0	0	0	0	0	0	0	78.66	0
mmu-miR-135a-2,mmu-miR-135a-1	363	1	88	0	66	0	65	0	297.66	1.18	83.6	0	108.24	0	89.7	0
mmu-miR-135b	181	0	0	0	1	0	2	0	148.42	0	0	0	1.64	0	2.76	0
mmu-miR-138-1,mmu-miR-138-2	0	0	0	0	0	0	158	0	0	0	0	0	0	0	218.04	0
mmu-miR-139	1441	7	3607	6	105	6	1751	226	1181.62	8.26	3426.65	6.66	172.2	16.08	2416.38	345.78
mmu-miR-140-3p	17487	70	2906	11	2	203	6207	1287	14339.3	82.6	2760.7	12.21	3.28	544.04	8565.66	1969.11
mmu-miR-140-5p	27798	132	7219	24	3137	135	11251	3248	22794.4	155.76	6858.05	26.64	5144.68	361.8	15526.4	4969.44
mmu-miR-142-3p	17	0	0	0	0	146	0	0	13.94	0	0	0	0	391.28	0	0
mmu-miR-143	163532	360	10058	399	57	1675	15446	2385	134096	424.8	9555.1	442.89	93.48	4489	21315.5	3649.05
mmu-miR-145	5055	5	1038	4	0	1	784	126	4145.1	5.9	986.1	4.44	0	2.68	1081.92	192.78
mmu-miR-146a	668	0	169	0	2	1	100	302	547.76	0	160.55	0	3.28	2.68	138	462.06
mmu-miR-146b	1981	5	393	6	29	0	64	122	1624.42	5.9	373.35	6.66	47.56	0	88.32	186.66
mmu-miR-148a	37524	139	7933	27	7	1154	8450	677	30769.7	164.02	7536.35	29.97	11.48	3092.72	11661	1035.81
mmu-miR-148b	1084	8	788	1	0	355	1320	488	888.88	9.44	748.6	1.11	0	951.4	1821.6	746.64
mmu-miR-149	1797	3	1516	0	915	10	1838	607	1473.54	3.54	1440.2	0	1500.6	26.8	2536.44	928.71
mmu-miR-151-3p	6123	3	1807	6	1	13	3051	1039	5020.86	3.54	1716.65	6.66	1.64	34.84	4210.38	1589.67
mmu-miR-151-5p	40973	104	12360	73	2864	50	11043	5578	33597.9	122.72	11742	81.03	4696.96	134	15239.3	8534.34
mmu-miR-152	2919	4	430	0	0	4	827	316	2393.58	4.72	408.5	0	0	10.72	1141.26	483.48
mmu-miR-155	3290	3	763	2	219	4	830	521	2697.8	3.54	724.85	2.22	359.16	10.72	1145.4	797.13
mmu-miR-15a	10882	20	2574	10	701	132	3741	147	8923.24	23.6	2445.3	11.1	1149.64	353.76	5162.58	224.91
mmu-miR-15b	26358	254	10771	320	3741	172	7259	6988	21613.6	299.72	10232.4	355.2	6135.24	460.96	10017.4	10691.6
mmu-miR-16-1,mmu-miR-16-2	138015	573	46506	687	6895	370	59322	27911	113172	676.14	44180.7	762.57	11307.8	991.6	81864.4	42703.8
mmu-miR-17	5558	10	4097	6	735	38	7114	1707	4557.56	11.8	3892.15	6.66	1205.4	101.84	9817.32	2611.71
mmu-miR-181a-2,mmu-miR-181a-1	7216	47	2081	80	615	17	2936	686	5917.12	55.46	1976.95	88.8	1008.6	45.56	4051.68	1049.58
mmu-miR-181b-2,mmu-miR-181b-1	4887	90	2064	17	261	9	2533	260	4007.34	106.2	1960.8	18.87	428.04	24.12	3495.54	397.8
mmu-miR-181d	75	0	32	0	62	0	85	81	61.5	0	30.4	0	101.68	0	117.3	123.93
mmu-miR-182	9203	30	8998	154	2166	61	13194	5183	7546.46	35.4	8548.1	170.94	3552.24	163.48	18207.7	7929.99
mmu-miR-183	12287	207	13433	41	1832	51	10176	1996	10075.3	244.26	12761.3	45.51	3004.48	136.68	14042.9	3053.88
mmu-miR-1839	139	0	37	0	0	0	0	47	113.98	0	35.15	0	0	0	0	71.91
mmu-miR-185	3478	5	1201	9	405	11	1857	126	2851.96	5.9	1140.95	9.99	664.2	29.48	2562.66	192.78
mmu-miR-186	2539	7	1465	2	279	16	3074	1111	2081.98	8.26	1391.75	2.22	457.56	42.88	4242.12	1699.83
mmu-miR-187	203	0	200	1	1	1	382	0	166.46	0	190	1.11	1.64	2.68	527.16	0
mmu-miR-188	2954	6	485	1	0	4	1055	343	2422.28	7.08	460.75	1.11	0	10.72	1455.9	524.79
mmu-miR-18a	2019	3	1004	64	159	14	2499	802	1655.58	3.54	953.8	71.04	260.76	37.52	3448.62	1227.06
mmu-miR-18b	0	0	0	0	0	0	0	1	0	0	0	0	0	0	0	1.53
mmu-miR-190	187	0	42	0	0	0	0	0	153.34	0	39.9	0	0	0	0	0
mmu-miR-190b	77	0	0	0	1	0	162	0	63.14	0	0	0	1.64	0	223.56	0
mmu-miR-191	9963	21	3450	7	6	18	4860	482	8169.66	24.78	3277.5	7.77	9.84	48.24	6706.8	737.46
mmu-miR-192	870	2	291	1	71	2	531	858	713.4	2.36	276.45	1.11	116.44	5.36	732.78	1312.74
mmu-miR-193-3p	26177	43	8747	83	14	2873	12938	9915	21465.1	50.74	8309.65	92.13	22.96	7699.64	17854.4	15170
mmu-miR-193-5p	642	40	393	2	3974	2	514	274	526.44	47.2	373.35	2.22	6517.36	5.36	709.32	419.22
mmu-miR-1930	0	0	1	0	0	0	71	0	0	0	0.95	0	0	0	97.98	0
mmu-miR-1934	1	0	94	0	0	0	14	0	0.82	0	89.3	0	0	0	19.32	0
mmu-miR-193b	5275	35	2467	5	2	126	2029	953	4325.5	41.3	2343.65	5.55	3.28	337.68	2800.02	1458.09
mmu-miR-194-2,mmu-miR-194-1	269	0	117	2	60	1	257	136	220.58	0	111.15	2.22	98.4	2.68	354.66	208.08
mmu-miR-1941-3p	0	0	67	0	0	0	0	0	0	0	63.65	0	0	0	0	0
mmu-miR-1943	66	0	0	0	0	0	0	0	54.12	0	0	0	0	0	0	0
mmu-miR-1947	39	0	38	1	0	0	0	0	31.98	0	36.1	1.11	0	0	0	0
mmu-miR-195	8294	13	1917	4	773	8	1683	1920	6801.08	15.34	1821.15	4.44	1267.72	21.44	2322.54	2937.6
mmu-miR-1955-3p	0	0	31	0	0	0	0	0	0	0	29.45	0	0	0	0	0
mmu-miR-1955-5p	136	0	108	0	0	0	24	98	111.52	0	102.6	0	0	0	33.12	149.94
mmu-miR-1964-3p	1193	37	326	2	2	1	467	98	978.26	43.66	309.7	2.22	3.28	2.68	644.46	149.94
mmu-miR-1964-5p	0	0	38	0	0	0	0	0	0	0	36.1	0	0	0	0	0
mmu-miR-1968	0	0	33	0	0	0	0	0	0	0	31.35	0	0	0	0	0
mmu-miR-196a-2,mmu-miR-196a-1	18023	23	7078	15	1490	18	3831	4133	14778.9	27.14	6724.1	16.65	2443.6	48.24	5286.78	6323.49
mmu-miR-196b	8963	12	3909	277	880	20	4345	514	7349.66	14.16	3713.55	307.47	1443.2	53.6	5996.1	786.42
mmu-miR-1981-3p	53	0	26	0	0	0	64	0	43.46	0	24.7	0	0	0	88.32	0
mmu-miR-1981-5p	56	0	138	0	0	3	935	1	45.92	0	131.1	0	0	8.04	1290.3	1.53
mmu-miR-1982	155	0	85	0	0	0	0	0	127.1	0	80.75	0	0	0	0	0
mmu-miR-199a-1-5p,mmu-miR-199a-2-5p	29286	159	7930	173	1854	50	11960	4448	24014.5	187.62	7533.5	192.03	3040.56	134	16504.8	6805.44
mmu-miR-199b,mmu-miR-199a-2-3p,mmu-miR-199a-1-3p	11464	16	2696	13	3	324	4054	2945	9400.48	18.88	2561.2	14.43	4.92	868.32	5594.52	4505.85
mmu-miR-19a	1161	3	641	0	5	423	1357	224	952.02	3.54	608.95	0	8.2	1133.64	1872.66	342.72
mmu-miR-19b-1,mmu-miR-19b-2	4380	5	1941	12	1	989	4817	1092	3591.6	5.9	1843.95	13.32	1.64	2650.52	6647.46	1670.76
mmu-miR-200a	0	0	27	0	0	0	85	0	0	0	25.65	0	0	0	117.3	0
mmu-miR-205	150	0	0	0	1	0	0	0	123	0	0	0	1.64	0	0	0
mmu-miR-206	2799	6	845	103	2	276	1106	1236	2295.18	7.08	802.75	114.33	3.28	739.68	1526.28	1891.08
mmu-miR-20a	4530	64	2351	6	588	8	5575	1471	3714.6	75.52	2233.45	6.66	964.32	21.44	7693.5	2250.63
mmu-miR-20b	15	0	0	0	0	0	10	5	12.3	0	0	0	0	0	13.8	7.65
mmu-miR-21	1034310	13340	351476	26479	39916	8254	323244	66806	848134	15741.2	333902	29391.7	65462.2	22120.7	446077	102213
mmu-miR-210	664	1	82	4	1	195	244	163	544.48	1.18	77.9	4.44	1.64	522.6	336.72	249.39
mmu-miR-212-3p	92	0	0	0	0	0	0	79	75.44	0	0	0	0	0	0	120.87
mmu-miR-212-5p	49	0	42	0	0	0	228	144	40.18	0	39.9	0	0	0	314.64	220.32
mmu-miR-214	21331	20	6228	67	1997	16	4402	2604	17491.4	23.6	5916.6	74.37	3275.08	42.88	6074.76	3984.12
mmu-miR-218-2,mmu-miR-218-1	557	0	0	0	0	0	0	0	456.74	0	0	0	0	0	0	0
mmu-miR-219-1	98	1	0	0	0	1	141	0	80.36	1.18	0	0	0	2.68	194.58	0
mmu-miR-219-2-5p	100	0	0	0	0	0	0	0	82	0	0	0	0	0	0	0
mmu-miR-22	2492304	8193	857090	7415	1772	297396	1182695	397077	2.04369e+06	9667.74	814236	8230.65	2906.08	797021	1.63212e+06	607528
mmu-miR-221	18935	67	6944	25	8	1533	10027	1903	15526.7	79.06	6596.8	27.75	13.12	4108.44	13837.3	2911.59
mmu-miR-222	9969	15	1918	71	2	14	2959	475	8174.58	17.7	1822.1	78.81	3.28	37.52	4083.42	726.75
mmu-miR-224	1132	9	683	1	484	1	772	349	928.24	10.62	648.85	1.11	793.76	2.68	1065.36	533.97
mmu-miR-23a	15633	62	4728	14	6	133	10275	1919	12819.1	73.16	4491.6	15.54	9.84	356.44	14179.5	2936.07
mmu-miR-23b	21737	134	4723	24	5	20	4012	481	17824.3	158.12	4486.85	26.64	8.2	53.6	5536.56	735.93
mmu-miR-24-1,mmu-miR-24-2	577259	1784	220503	2006	318	23152	202372	50751	473352	2105.12	209478	2226.66	521.52	62047.4	279273	77649
mmu-miR-25	14743	39	7483	23	3	471	6035	2577	12089.3	46.02	7108.85	25.53	4.92	1262.28	8328.3	3942.81
mmu-miR-26a-1,mmu-miR-26a-2	147883	475	32131	448	5489	190	35225	22542	121264	560.5	30524.4	497.28	9001.96	509.2	48610.5	34489.3
mmu-miR-26b	20172	39	10752	132	1156	39	7891	848	16541	46.02	10214.4	146.52	1895.84	104.52	10889.6	1297.44
mmu-miR-27a	61347	65	7042	30	16	1175	20215	22355	50304.5	76.7	6689.9	33.3	26.24	3149	27896.7	34203.2
mmu-miR-27b	58565	275	6890	109	8	747	16089	1681	48023.3	324.5	6545.5	120.99	13.12	2001.96	22202.8	2571.93
mmu-miR-28-3p	26098	23	4426	29	5	1956	4898	5006	21400.4	27.14	4204.7	32.19	8.2	5242.08	6759.24	7659.18
mmu-miR-28-5p	16610	24	3303	17	538	15	4654	2780	13620.2	28.32	3137.85	18.87	882.32	40.2	6422.52	4253.4
mmu-miR-294	0	0	319	1	1	185	240	61	0	0	303.05	1.11	1.64	495.8	331.2	93.33
mmu-miR-295	0	0	47	0	0	0	0	0	0	0	44.65	0	0	0	0	0
mmu-miR-296-3p	137	2	0	0	0	0	0	0	112.34	2.36	0	0	0	0	0	0
mmu-miR-296-5p	56	0	0	0	0	0	0	0	45.92	0	0	0	0	0	0	0
mmu-miR-297a-3-5p,mmu-miR-297a-4-5p,mmu-miR-297a-5-5p	1989	14	1428	3	262	10	2280	417	1630.98	16.52	1356.6	3.33	429.68	26.8	3146.4	638.01
mmu-miR-297a-4-3p,mmu-miR-297c-3p,mmu-miR-297a-3-3p,mmu-miR-297b-3p	335	0	92	0	0	1	1	133	274.7	0	87.4	0	0	2.68	1.38	203.49
mmu-miR-297a-5-3p	49	0	24	0	0	0	0	0	40.18	0	22.8	0	0	0	0	0
mmu-miR-297b-5p	548	0	183	0	181	3	213	0	449.36	0	173.85	0	296.84	8.04	293.94	0
mmu-miR-297c-5p	496	3	420	0	0	1	332	189	406.72	3.54	399	0	0	2.68	458.16	289.17
mmu-miR-29a	50044	140	13817	66	14	1615	19566	14323	41036.1	165.2	13126.1	73.26	22.96	4328.2	27001.1	21914.2
mmu-miR-29b-1,mmu-miR-29b-2	1170867	3725	482754	3484	487	54818	472952	165955	960111	4395.5	458616	3867.24	798.68	146912	652674	253911
mmu-miR-29c	394	0	169	2	0	114	178	244	323.08	0	160.55	2.22	0	305.52	245.64	373.32
mmu-miR-300	0	0	42	0	0	0	0	0	0	0	39.9	0	0	0	0	0
mmu-miR-301a	812	3	463	0	1	80	837	0	665.84	3.54	439.85	0	1.64	214.4	1155.06	0
mmu-miR-3057-5p	104	0	82	0	51	0	0	0	85.28	0	77.9	0	83.64	0	0	0
mmu-miR-3058	86	0	0	0	0	0	0	0	70.52	0	0	0	0	0	0	0
mmu-miR-3061-3p	0	0	20	0	0	0	0	0	0	0	19	0	0	0	0	0
mmu-miR-3061-5p	49	0	13	0	0	0	0	0	40.18	0	12.35	0	0	0	0	0
mmu-miR-3068	4889	54	2534	5	913	9	1856	633	4008.98	63.72	2407.3	5.55	1497.32	24.12	2561.28	968.49
mmu-miR-3074-1-3p	0	0	0	0	0	0	116	0	0	0	0	0	0	0	160.08	0
mmu-miR-3076-3p	0	0	32	0	0	0	0	0	0	0	30.4	0	0	0	0	0
mmu-miR-3079-5p	0	0	0	69	0	0	0	0	0	0	0	76.59	0	0	0	0
mmu-miR-3084	113	0	27	0	0	0	0	0	92.66	0	25.65	0	0	0	0	0
mmu-miR-3086-3p	0	0	40	0	0	0	0	0	0	0	38	0	0	0	0	0
mmu-miR-3089-3p	43	0	0	0	0	0	64	0	35.26	0	0	0	0	0	88.32	0
mmu-miR-3095-3p	96	0	20	0	0	0	0	0	78.72	0	19	0	0	0	0	0
mmu-miR-3096-3p	0	0	7	0	0	0	0	0	0	0	6.65	0	0	0	0	0
mmu-miR-3096-5p	0	0	0	0	0	0	0	62	0	0	0	0	0	0	0	94.86
mmu-miR-3098-3p	78	0	0	0	0	1	60	69	63.96	0	0	0	0	2.68	82.8	105.57
mmu-miR-3098-5p	52	0	0	0	0	0	0	0	42.64	0	0	0	0	0	0	0
mmu-miR-30a	25971	181	9501	117	3225	50	9980	4797	21296.2	213.58	9025.95	129.87	5289	134	13772.4	7339.41
mmu-miR-30b	5116	6	2128	6	358	157	4313	1895	4195.12	7.08	2021.6	6.66	587.12	420.76	5951.94	2899.35
mmu-miR-30c-2,mmu-miR-30c-1	18585	61	8266	25	182	43	9036	2881	15239.7	71.98	7852.7	27.75	298.48	115.24	12469.7	4407.93
mmu-miR-30d	30660	138	20221	145	3237	78	18107	6001	25141.2	162.84	19210	160.95	5308.68	209.04	24987.7	9181.53
mmu-miR-30e	23982	33	7052	119	663	33	10041	7063	19665.2	38.94	6699.4	132.09	1087.32	88.44	13856.6	10806.4
mmu-miR-31	248138	1315	115383	1017	29327	812	144426	72297	203473	1551.7	109614	1128.87	48096.3	2176.16	199308	110614
mmu-miR-3102.1	99	0	0	0	0	0	0	0	81.18	0	0	0	0	0	0	0
mmu-miR-3102.2-5p	25	0	2	0	0	0	0	0	20.5	0	1.9	0	0	0	0	0
mmu-miR-3108	0	0	1	0	0	1	73	0	0	0	0.95	0	0	2.68	100.74	0
mmu-miR-32	34302	54	8388	127	498	37	10397	2602	28127.6	63.72	7968.6	140.97	816.72	99.16	14347.9	3981.06
mmu-miR-320	7116	11	3146	8	37	1077	4497	1407	5835.12	12.98	2988.7	8.88	60.68	2886.36	6205.86	2152.71
mmu-miR-322	30675	184	5038	14	596	33	6129	2761	25153.5	217.12	4786.1	15.54	977.44	88.44	8458.02	4224.33
mmu-miR-324	5312	8	1851	4	122	19	4647	51	4355.84	9.44	1758.45	4.44	200.08	50.92	6412.86	78.03
mmu-miR-326	337	0	29	0	0	1	195	67	276.34	0	27.55	0	0	2.68	269.1	102.51
mmu-miR-328	13143	69	5112	15	5	18	6685	3312	10777.3	81.42	4856.4	16.65	8.2	48.24	9225.3	5067.36
mmu-miR-33	17355	65	1002	2	599	10	1665	3128	14231.1	76.7	951.9	2.22	982.36	26.8	2297.7	4785.84
mmu-miR-330-5p	243	0	145	0	135	1	227	171	199.26	0	137.75	0	221.4	2.68	313.26	261.63
mmu-miR-331	42	0	0	0	0	0	0	0	34.44	0	0	0	0	0	0	0
mmu-miR-338-3p	0	0	31	0	0	0	0	0	0	0	29.45	0	0	0	0	0
mmu-miR-339	113	0	137	2	36	0	33	69	92.66	0	130.15	2.22	59.04	0	45.54	105.57
mmu-miR-340	367	4	507	89	0	0	211	1	300.94	4.72	481.65	98.79	0	0	291.18	1.53
mmu-miR-342	3052	12	1999	4	1	2	975	523	2502.64	14.16	1899.05	4.44	1.64	5.36	1345.5	800.19
mmu-miR-344-1,mmu-miR-344-2	55	0	135	0	0	0	0	0	45.1	0	128.25	0	0	0	0	0
mmu-miR-345-5p	94	0	104	0	83	3	261	0	77.08	0	98.8	0	136.12	8.04	360.18	0
mmu-miR-34a	2898	14	625	6	53	3	725	72	2376.36	16.52	593.75	6.66	86.92	8.04	1000.5	110.16
mmu-miR-34b-3p	1749	0	143	1	0	0	2	220	1434.18	0	135.85	1.11	0	0	2.76	336.6
mmu-miR-34b-5p	320	0	0	0	0	0	0	0	262.4	0	0	0	0	0	0	0
mmu-miR-34c	1678	0	79	0	80	0	146	78	1375.96	0	75.05	0	131.2	0	201.48	119.34
mmu-miR-350	952	4	334	111	0	126	997	514	780.64	4.72	317.3	123.21	0	337.68	1375.86	786.42
mmu-miR-351	1761	2	122	0	0	1	526	78	1444.02	2.36	115.9	0	0	2.68	725.88	119.34
mmu-miR-361	1777	2	813	4	103	6	761	640	1457.14	2.36	772.35	4.44	168.92	16.08	1050.18	979.2
mmu-miR-362-3p	385	0	102	0	1	0	199	40	315.7	0	96.9	0	1.64	0	274.62	61.2
mmu-miR-362-5p	40	0	50	0	0	0	88	0	32.8	0	47.5	0	0	0	121.44	0
mmu-miR-365-2,mmu-miR-365-1	1683	1	1190	0	0	137	1785	456	1380.06	1.18	1130.5	0	0	367.16	2463.3	697.68
mmu-miR-374	4350	4	1289	5	385	49	2405	56	3567	4.72	1224.55	5.55	631.4	131.32	3318.9	85.68
mmu-miR-378	3140	8	3109	5	1	755	6117	458	2574.8	9.44	2953.55	5.55	1.64	2023.4	8441.46	700.74
mmu-miR-379	0	0	0	0	0	0	9	0	0	0	0	0	0	0	12.42	0
mmu-miR-421	158	0	391	0	0	0	121	1	129.56	0	371.45	0	0	0	166.98	1.53
mmu-miR-423-3p	20074	299	10890	85	11	2291	14885	1884	16460.7	352.82	10345.5	94.35	18.04	6139.88	20541.3	2882.52
mmu-miR-423-5p	3162	117	1891	87	568	142	2002	262	2592.84	138.06	1796.45	96.57	931.52	380.56	2762.76	400.86
mmu-miR-425	10832	74	5291	15	1252	23	2829	450	8882.24	87.32	5026.45	16.65	2053.28	61.64	3904.02	688.5
mmu-miR-449a	240	0	3	0	0	0	111	0	196.8	0	2.85	0	0	0	153.18	0
mmu-miR-450a-2-3p	49	0	0	0	0	0	0	82	40.18	0	0	0	0	0	0	125.46
mmu-miR-450a-2-5p,mmu-miR-450a-1	416	1	124	1	62	0	2	154	341.12	1.18	117.8	1.11	101.68	0	2.76	235.62
mmu-miR-450b-3p	61	0	0	0	0	2	87	0	50.02	0	0	0	0	5.36	120.06	0
mmu-miR-450b-5p	591	85	216	2	7	0	5	0	484.62	100.3	205.2	2.22	11.48	0	6.9	0
mmu-miR-451	0	54	0	91	0	0	0	0	0	63.72	0	101.01	0	0	0	0
mmu-miR-452-3p	734	0	153	0	1	0	733	0	601.88	0	145.35	0	1.64	0	1011.54	0
mmu-miR-452-5p	407	0	132	0	0	0	167	0	333.74	0	125.4	0	0	0	230.46	0
mmu-miR-455-3p	954	0	38	0	0	0	0	0	782.28	0	36.1	0	0	0	0	0
mmu-miR-455-5p	266	0	0	0	0	0	0	0	218.12	0	0	0	0	0	0	0
mmu-miR-466a-5p,mmu-miR-466p-5p	327	0	40	0	768	0	386	170	268.14	0	38	0	1259.52	0	532.68	260.1
mmu-miR-466b-3-3p,mmu-miR-466b-6-3p,mmu-miR-466b-4-3p,mmu-miR-466p-3p,mmu-miR-466b-2-3p,mmu-miR-466a-3p,mmu-miR-466b-9-3p,mmu-miR-466e-3p,mmu-miR-466c-1-3p,mmu-miR-466b-1-3p,mmu-miR-466b-7-3p,mmu-miR-466b-8-3p,mmu-miR-466b-5-3p,mmu-miR-466c-2-3p,mmu-miR-466c-3p	1340	2	672	1	0	30	228	222	1098.8	2.36	638.4	1.11	0	80.4	314.64	339.66
mmu-miR-466b-7-5p,mmu-miR-466b-3-5p,mmu-miR-466e-5p,mmu-miR-466b-6-5p,mmu-miR-466b-1-5p,mmu-miR-466b-4-5p,mmu-miR-466b-2-5p,mmu-miR-466b-9-5p,mmu-miR-466b-5-5p,mmu-miR-466b-8-5p,mmu-miR-466o-5p	537	0	259	1	49	3	96	2	440.34	0	246.05	1.11	80.36	8.04	132.48	3.06
mmu-miR-466c-1-5p,mmu-miR-466c-2-5p,mmu-miR-466c-5p	1143	0	360	6	1	1	500	504	937.26	0	342	6.66	1.64	2.68	690	771.12
mmu-miR-466d-3p	1922	3	710	1	0	114	243	325	1576.04	3.54	674.5	1.11	0	305.52	335.34	497.25
mmu-miR-466f-2,mmu-miR-466f-1,mmu-miR-466f-3	492	0	415	0	145	0	317	63	403.44	0	394.25	0	237.8	0	437.46	96.39
mmu-miR-466h	3528	5	1642	2	261	12	2667	957	2892.96	5.9	1559.9	2.22	428.04	32.16	3680.46	1464.21
mmu-miR-466k	0	1	0	0	70	0	0	0	0	1.18	0	0	114.8	0	0	0
mmu-miR-466l-3p	52	0	0	0	0	0	0	0	42.64	0	0	0	0	0	0	0
mmu-miR-466m-3p	176	0	1	0	0	0	0	0	144.32	0	0.95	0	0	0	0	0
mmu-miR-466m-5p	1	0	1	0	0	0	0	0	0.82	0	0.95	0	0	0	0	0
mmu-miR-466n-3p	166	0	86	4	0	1	104	0	136.12	0	81.7	4.44	0	2.68	143.52	0
mmu-miR-466n-5p,mmu-miR-466d-5p	372	0	136	0	155	1	425	0	305.04	0	129.2	0	254.2	2.68	586.5	0
mmu-miR-467a-4,mmu-miR-467a-10,mmu-miR-467a-8,mmu-miR-467b,mmu-miR-467a-9,mmu-miR-467a-3,mmu-miR-467a-5,mmu-miR-467a-6,mmu-miR-467a-7,mmu-miR-467a,mmu-miR-467a-2,mmu-miR-467a-1	15596	96	2833	146	1733	48	7949	2781	12788.7	113.28	2691.35	162.06	2842.12	128.64	10969.6	4254.93
mmu-miR-467c	4715	14	1955	3	962	13	3231	1405	3866.3	16.52	1857.25	3.33	1577.68	34.84	4458.78	2149.65
mmu-miR-467d	1752	3	2	0	212	3	821	1047	1436.64	3.54	1.9	0	347.68	8.04	1132.98	1601.91
mmu-miR-467e	660	1	496	0	1	1	477	113	541.2	1.18	471.2	0	1.64	2.68	658.26	172.89
mmu-miR-470-5p	0	0	20	0	0	0	0	0	0	0	19	0	0	0	0	0
mmu-miR-486,mmu-miR-3107	135	0	40	0	1	0	301	0	110.7	0	38	0	1.64	0	415.38	0
mmu-miR-491	6	0	0	0	0	0	0	0	4.92	0	0	0	0	0	0	0
mmu-miR-497	8860	12	2616	8	2888	12	2252	1503	7265.2	14.16	2485.2	8.88	4736.32	32.16	3107.76	2299.59
mmu-miR-499	0	0	14	0	0	0	0	73	0	0	13.3	0	0	0	0	111.69
mmu-miR-500	2650	4	671	2	0	334	986	1007	2173	4.72	637.45	2.22	0	895.12	1360.68	1540.71
mmu-miR-501-3p	394	1	436	0	0	157	1068	62	323.08	1.18	414.2	0	0	420.76	1473.84	94.86
mmu-miR-501-5p	177	0	132	0	105	0	68	0	145.14	0	125.4	0	172.2	0	93.84	0
mmu-miR-503	1757	1	532	3	262	141	1138	154	1440.74	1.18	505.4	3.33	429.68	377.88	1570.44	235.62
mmu-miR-505-5p	86	0	164	0	0	0	101	0	70.52	0	155.8	0	0	0	139.38	0
mmu-miR-532-3p	1326	2	359	7	1	110	496	405	1087.32	2.36	341.05	7.77	1.64	294.8	684.48	619.65
mmu-miR-532-5p	1049	121	593	426	237	260	1181	325	860.18	142.78	563.35	472.86	388.68	696.8	1629.78	497.25
mmu-miR-542	160	0	33	0	0	0	0	0	131.2	0	31.35	0	0	0	0	0
mmu-miR-615	6258	5	636	1	1	8	1465	208	5131.56	5.9	604.2	1.11	1.64	21.44	2021.7	318.24
mmu-miR-652	4455	14	2977	1	4	461	5919	1463	3653.1	16.52	2828.15	1.11	6.56	1235.48	8168.22	2238.39
mmu-miR-664-3p	176	0	295	0	0	116	61	117	144.32	0	280.25	0	0	310.88	84.18	179.01
mmu-miR-664-5p	438	1	195	0	188	3	237	227	359.16	1.18	185.25	0	308.32	8.04	327.06	347.31
mmu-miR-669a-1-3p	48	0	38	0	1	1	149	2	39.36	0	36.1	0	1.64	2.68	205.62	3.06
mmu-miR-669a-12-3p,mmu-miR-669a-7-3p,mmu-miR-669a-9-3p,mmu-miR-669a-13-3p,mmu-miR-669a-3-3p,mmu-miR-669o-3p,mmu-miR-669a-5-3p,mmu-miR-669a-8-3p,mmu-miR-669a-6-3p,mmu-miR-669a-10-3p,mmu-miR-669a-11-3p,mmu-miR-669a-4-3p,mmu-miR-669a-2-3p	5027	10	2641	9	2	420	3838	1086	4122.14	11.8	2508.95	9.99	3.28	1125.6	5296.44	1661.58
mmu-miR-669a-7-5p,mmu-miR-669a-13-5p,mmu-miR-669a-3-5p,mmu-miR-669a-6-5p,mmu-miR-669a-8-5p,mmu-miR-669a-4-5p,mmu-miR-669a-9-5p,mmu-miR-669a-10-5p,mmu-miR-669a-12-5p,mmu-miR-669a-2-5p,mmu-miR-669p-2,mmu-miR-669a-11-5p,mmu-miR-669a-5-5p,mmu-miR-669a-1-5p,mmu-miR-669p-1	3430	41	1741	66	1234	8	1571	2295	2812.6	48.38	1653.95	73.26	2023.76	21.44	2167.98	3511.35
mmu-miR-669b,mmu-miR-669m-1,mmu-miR-669m-2	3772	4	1338	2	288	1	851	1208	3093.04	4.72	1271.1	2.22	472.32	2.68	1174.38	1848.24
mmu-miR-669c	467	0	346	0	0	0	359	0	382.94	0	328.7	0	0	0	495.42	0
mmu-miR-669d-2,mmu-miR-669d	694	0	72	0	0	0	155	541	569.08	0	68.4	0	0	0	213.9	827.73
mmu-miR-669e	338	2	221	0	0	1	170	37	277.16	2.36	209.95	0	0	2.68	234.6	56.61
mmu-miR-669f-3p	2593	52	1320	3	0	295	1155	145	2126.26	61.36	1254	3.33	0	790.6	1593.9	221.85
mmu-miR-669f-5p	345	0	292	1	183	0	116	228	282.9	0	277.4	1.11	300.12	0	160.08	348.84
mmu-miR-669h	216	1	131	2	0	0	65	0	177.12	1.18	124.45	2.22	0	0	89.7	0
mmu-miR-669l	729	0	120	0	1	3	428	0	597.78	0	114	0	1.64	8.04	590.64	0
mmu-miR-669o-5p	355	0	71	0	35	1	201	0	291.1	0	67.45	0	57.4	2.68	277.38	0
mmu-miR-670-3p	0	0	39	0	0	0	0	0	0	0	37.05	0	0	0	0	0
mmu-miR-671	953	1	415	0	1245	5	768	719	781.46	1.18	394.25	0	2041.8	13.4	1059.84	1100.07
mmu-miR-674-3p	3564	1	756	1	0	281	927	565	2922.48	1.18	718.2	1.11	0	753.08	1279.26	864.45
mmu-miR-674-5p	7623	17	2830	53	461	11	3192	2214	6250.86	20.06	2688.5	58.83	756.04	29.48	4404.96	3387.42
mmu-miR-676-3p	1762	2	211	1	0	115	242	116	1444.84	2.36	200.45	1.11	0	308.2	333.96	177.48
mmu-miR-676-5p	648	0	0	0	0	0	0	0	531.36	0	0	0	0	0	0	0
mmu-miR-700-3p	95	0	0	0	0	0	96	0	77.9	0	0	0	0	0	132.48	0
mmu-miR-700-5p	80	0	0	0	0	1	154	0	65.6	0	0	0	0	2.68	212.52	0
mmu-miR-701	97	0	0	0	0	0	0	0	79.54	0	0	0	0	0	0	0
mmu-miR-708	165	0	80	70	0	2	261	0	135.3	0	76	77.7	0	5.36	360.18	0
mmu-miR-744	4798	10	2914	73	2	10	2213	145	3934.36	11.8	2768.3	81.03	3.28	26.8	3053.94	221.85
mmu-miR-760-3p	0	0	42	0	0	0	0	0	0	0	39.9	0	0	0	0	0
mmu-miR-760-5p	0	0	0	0	0	0	11	0	0	0	0	0	0	0	15.18	0
mmu-miR-7a-2,mmu-miR-7a-1	2387	18	3122	7	529	5	2271	898	1957.34	21.24	2965.9	7.77	867.56	13.4	3133.98	1373.94
mmu-miR-7b	3	0	52	0	0	0	0	0	2.46	0	49.4	0	0	0	0	0
mmu-miR-872	11911	48	1740	95	63	19	2755	517	9767.02	56.64	1653	105.45	103.32	50.92	3801.9	791.01
mmu-miR-877-3p	64	0	160	0	0	0	139	104	52.48	0	152	0	0	0	191.82	159.12
mmu-miR-877-5p	1	0	202	0	0	0	182	0	0.82	0	191.9	0	0	0	251.16	0
mmu-miR-881	0	0	42	0	0	0	0	0	0	0	39.9	0	0	0	0	0
mmu-miR-9-2,mmu-miR-9-1,mmu-miR-9-3	942	0	30	0	0	0	0	107	772.44	0	28.5	0	0	0	0	163.71
mmu-miR-92a-1	28284	62	18112	55	65	2485	17999	8887	23192.9	73.16	17206.4	61.05	106.6	6659.8	24838.6	13597.1
mmu-miR-92a-2	1960	3	1316	0	7	3	4241	749	1607.2	3.54	1250.2	0	11.48	8.04	5852.58	1145.97
mmu-miR-92b	972	0	378	1	0	124	299	148	797.04	0	359.1	1.11	0	332.32	412.62	226.44
mmu-miR-93	3716	3	2168	2	44	16	4886	412	3047.12	3.54	2059.6	2.22	72.16	42.88	6742.68	630.36
mmu-miR-96	115596	792	94738	829	9570	751	91908	37741	94788.7	934.56	90001.1	920.19	15694.8	2012.68	126833	57743.7
mmu-miR-98	1902	6	1911	7	644	6	1268	60	1559.64	7.08	1815.45	7.77	1056.16	16.08	1749.84	91.8
mmu-miR-99a	54619	201	15002	357	2655	100	20820	10502	44787.6	237.18	14251.9	396.27	4354.2	268	28731.6	16068.1
mmu-miR-99b	117081	374	54834	617	23363	519	105496	11398	96006.4	441.32	52092.3	684.87	38315.3	1390.92	145584	17438.9
TOTAL:	8379301	39611	2959798	50741	219269	420201	3372965	1131248	6.87103e+06	46741	2.81181e+06	56322.5	359601	1.12614e+06	4.65469e+06	1.73081e+06

## Sheet: Replicate 1 - 5p miRNAs
	RAW READS								NORMALIZED READS (See "Normalization Factors" sheet or Supplementary Table 1)
	WT	KO							WT	KO
miR	mCherry	mCherry	hsDicer	D1320A/D1709A	D1320A	D1709A	K70A	YY971AA	mCherry	mCherry	hsDicer	D1320A/D1709A	D1320A	D1709A	K70A	YY971AA
mmu-let-7a-2,mmu-let-7a-1	123527	271	90748	74	6080	81	20657	26469	123527	552.84	111620	99.9	10457.6	161.19	24788.4	26469
mmu-let-7b	346171	846	132968	3718	31909	524	148551	55866	346171	1725.84	163551	5019.3	54883.5	1042.76	178261	55866
mmu-let-7c-1,mmu-let-7c-2	489987	1261	295215	242	54247	1918	411328	73730	489987	2572.44	363114	326.7	93304.8	3816.82	493594	73730
mmu-let-7d	31402	103	42423	26	5264	342	39495	3931	31402	210.12	52180.3	35.1	9054.08	680.58	47394	3931
mmu-let-7e	49936	119	27030	18	2996	38	12345	78	49936	242.76	33246.9	24.3	5153.12	75.62	14814	78
mmu-let-7f-2,mmu-let-7f-1	179165	395	46796	38	11970	162	61003	7478	179165	805.8	57559.1	51.3	20588.4	322.38	73203.6	7478
mmu-let-7g	12938	33	17385	18	830	30	12988	111	12938	67.32	21383.5	24.3	1427.6	59.7	15585.6	111
mmu-let-7i	291624	835	188802	698	42882	583	173448	63540	291624	1703.4	232226	942.3	73757	1160.17	208138	63540
mmu-miR-100	21914	50	419	4	994	30	9051	7515	21914	102	515.37	5.4	1709.68	59.7	10861.2	7515
mmu-miR-106a	0	0	1	0	0	0	0	1	0	0	1.23	0	0	0	0	1
mmu-miR-106b	4385	12	3	4	2017	21	5602	6605	4385	24.48	3.69	5.4	3469.24	41.79	6722.4	6605
mmu-miR-10a	0	5	12	0	1	0	1	4	0	10.2	14.76	0	1.72	0	1.2	4
mmu-miR-10b	4	15951	4979	4	1062	29	8811	7336	4	32540	6124.17	5.4	1826.64	57.71	10573.2	7336
mmu-miR-1198-5p	235	7	6895	6	1262	6	2062	4	235	14.28	8480.85	8.1	2170.64	11.94	2474.4	4
mmu-miR-1247	0	0	0	0	139	0	0	0	0	0	0	0	239.08	0	0	0
mmu-miR-125a	34381	88	6020	11	949	114	43647	9910	34381	179.52	7404.6	14.85	1632.28	226.86	52376.4	9910
mmu-miR-125b-1,mmu-miR-125b-2	304611	650	114512	2177	8347	315	75084	200364	304611	1326	140850	2938.95	14356.8	626.85	90100.8	200364
mmu-miR-129-1-5p	3926	7	0	0	1	0	0	0	3926	14.28	0	0	1.72	0	0	0
mmu-miR-130b-5p	0	2	2	3	1051	15	1715	16255	0	4.08	2.46	4.05	1807.72	29.85	2058	16255
mmu-miR-132-5p	0	1	0	0	237	0	0	0	0	2.04	0	0	407.64	0	0	0
mmu-miR-139	5925	19	2	0	182	1	1	0	5925	38.76	2.46	0	313.04	1.99	1.2	0
mmu-miR-140-5p	17059	42	9	3	2785	48	15695	15	17059	85.68	11.07	4.05	4790.2	95.52	18834	15
mmu-miR-142-5p	0	0	0	0	133	0	0	0	0	0	0	0	228.76	0	0	0
mmu-miR-145	2	2	7181	5	81	1	4	3	2	4.08	8832.63	6.75	139.32	1.99	4.8	3
mmu-miR-146a	1	0	0	0	187	275	285	0	1	0	0	0	321.64	547.25	342	0
mmu-miR-146b	1	0	1	0	246	11	4172	3	1	0	1.23	0	423.12	21.89	5006.4	3
mmu-miR-149	9823	32	5743	7	4048	4	1	38	9823	65.28	7063.89	9.45	6962.56	7.96	1.2	38
mmu-miR-150	0	0	0	0	45	0	0	0	0	0	0	0	77.4	0	0	0
mmu-miR-151-5p	40891	101	5462	3970	13635	147	34030	64101	40891	206.04	6718.26	5359.5	23452.2	292.53	40836	64101
mmu-miR-155	7019	30	16824	15	1748	30	7869	17907	7019	61.2	20693.5	20.25	3006.56	59.7	9442.8	17907
mmu-miR-15a	5069	7	3	11	1977	11	3455	6635	5069	14.28	3.69	14.85	3400.44	21.89	4146	6635
mmu-miR-15b	956	6	3	4	5491	342	14135	8980	956	12.24	3.69	5.4	9444.52	680.58	16962	8980
mmu-miR-16-2,mmu-miR-16-1	58487	126	21103	29	11930	228	27878	42093	58487	257.04	25956.7	39.15	20519.6	453.72	33453.6	42093
mmu-miR-17	5	9	16938	16	1352	12	2759	8233	5	18.36	20833.7	21.6	2325.44	23.88	3310.8	8233
mmu-miR-181a-1,mmu-miR-181a-2	18195	20919	21	1	1220	160	3017	2	18195	42674.8	25.83	1.35	2098.4	318.4	3620.4	2
mmu-miR-181b-2,mmu-miR-181b-1	2830	13	6415	4	406	8	3003	3	2830	26.52	7890.45	5.4	698.32	15.92	3603.6	3
mmu-miR-181d	2	0	3	0	0	0	2	0	2	0	3.69	0	0	0	2.4	0
mmu-miR-182	12950	61	19504	13	7278	602	24756	13662	12950	124.44	23989.9	17.55	12518.2	1197.98	29707.2	13662
mmu-miR-183	22089	120	66296	48	7304	91	34629	38056	22089	244.8	81544.1	64.8	12562.9	181.09	41554.8	38056
mmu-miR-185	6631	14	3	1	920	0	1	1	6631	28.56	3.69	1.35	1582.4	0	1.2	1
mmu-miR-186	8546	23	9	6	590	40	10565	22130	8546	46.92	11.07	8.1	1014.8	79.6	12678	22130
mmu-miR-188	0	0	0	0	43	0	0	0	0	0	0	0	73.96	0	0	0
mmu-miR-18a	0	0	174	1	1253	21	8948	7	0	0	214.02	1.35	2155.16	41.79	10737.6	7
mmu-miR-18b	0	0	0	0	0	0	1	0	0	0	0	0	0	0	1.2	0
mmu-miR-191	8896	33	16027	10	86	281	13910	552	8896	67.32	19713.2	13.5	147.92	559.19	16692	552
mmu-miR-192	0	0	0	0	4	0	0	38	0	0	0	0	6.88	0	0	38
mmu-miR-193-5p	800	4	4	3	7044	27	9069	8394	800	8.16	4.92	4.05	12115.7	53.73	10882.8	8394
mmu-miR-1930	0	0	0	0	56	0	0	0	0	0	0	0	96.32	0	0	0
mmu-miR-1933-5p	0	0	0	0	68	0	0	0	0	0	0	0	116.96	0	0	0
mmu-miR-195	2	0	8	0	107	0	0	6	2	0	9.84	0	184.04	0	0	6
mmu-miR-1955-5p	0	0	0	0	142	0	0	2	0	0	0	0	244.24	0	0	2
mmu-miR-1964-5p	0	0	0	0	13	0	0	0	0	0	0	0	22.36	0	0	0
mmu-miR-196a-2,mmu-miR-196a-1	6851	48	31698	22	3756	298	9715	23100	6851	97.92	38988.5	29.7	6460.32	593.02	11658	23100
mmu-miR-196b	5008	11	28	0	2527	431	5172	47	5008	22.44	34.44	0	4346.44	857.69	6206.4	47
mmu-miR-1981-5p	0	0	0	0	54	0	0	0	0	0	0	0	92.88	0	0	0
mmu-miR-199a-2-5p,mmu-miR-199a-1-5p	57518	148	13188	15	1761	247	28838	34375	57518	301.92	16221.2	20.25	3028.92	491.53	34605.6	34375
mmu-miR-20a	0	0	9	0	1406	0	1	10	0	0	11.07	0	2418.32	0	1.2	10
mmu-miR-20b	0	0	10	0	1	0	1	15	0	0	12.3	0	1.72	0	1.2	15
mmu-miR-21	1225052	37765	1181606	47051	87435	13665	1040599	413289	1225052	77040.6	1.45338e+06	63518.9	150388	27193.3	1.24872e+06	413289
mmu-miR-212-5p	0	0	0	0	266	0	3	1	0	0	0	0	457.52	0	3.6	1
mmu-miR-214	8120	25	6924	2	3725	4	1	5357	8120	51	8516.52	2.7	6407	7.96	1.2	5357
mmu-miR-218-2,mmu-miR-218-1	0	0	0	0	49	0	0	0	0	0	0	0	84.28	0	0	0
mmu-miR-219-1	2	0	0	0	43	0	0	0	2	0	0	0	73.96	0	0	0
mmu-miR-219-2-5p	14	0	0	0	0	0	0	0	14	0	0	0	0	0	0	0
mmu-miR-224	9694	25	6155	6	492	1	0	2	9694	51	7570.65	8.1	846.24	1.99	0	2
mmu-miR-26a-2,mmu-miR-26a-1	259334	637	78466	71	11375	283	88464	160653	259334	1299.48	96513.2	95.85	19565	563.17	106157	160653
mmu-miR-26b	26214	51	17117	17	3203	117	41380	18522	26214	104.04	21053.9	22.95	5509.16	232.83	49656	18522
mmu-miR-28-5p	14424	68	14153	12	2947	60	14769	65093	14424	138.72	17408.2	16.2	5068.84	119.4	17722.8	65093
mmu-miR-297a-4-5p,mmu-miR-297a-5-5p,mmu-miR-297a-3-5p	0	0	0	0	495	0	0	0	0	0	0	0	851.4	0	0	0
mmu-miR-297b-5p	0	0	1	0	212	0	3	0	0	0	1.23	0	364.64	0	3.6	0
mmu-miR-297c-5p	0	0	0	0	112	0	0	0	0	0	0	0	192.64	0	0	0
mmu-miR-3057-5p	0	0	1	0	261	0	0	0	0	0	1.23	0	448.92	0	0	0
mmu-miR-3067	0	0	0	0	24	0	0	0	0	0	0	0	41.28	0	0	0
mmu-miR-3068	1	2	8360	3	966	16	6780	6	1	4.08	10282.8	4.05	1661.52	31.84	8136	6
mmu-miR-30a	88237	305	43512	5094	14740	155	39453	75567	88237	622.2	53519.8	6876.9	25352.8	308.45	47343.6	75567
mmu-miR-30b	1	0	0	0	855	0	0	0	1	0	0	0	1470.6	0	0	0
mmu-miR-30c-1,mmu-miR-30c-2	20820	73	5918	13	1105	46	15020	15824	20820	148.92	7279.14	17.55	1900.6	91.54	18024	15824
mmu-miR-30d	61503	230	38965	104	6496	105	30968	70859	61503	469.2	47926.9	140.4	11173.1	208.95	37161.6	70859
mmu-miR-30e	74000	251	63361	43	2528	105	40988	16981	74000	512.04	77934	58.05	4348.16	208.95	49185.6	16981
mmu-miR-31	31071	179	95466	2346	60977	695	49369	47611	31071	365.16	117423	3167.1	104880	1383.05	59242.8	47611
mmu-miR-32	919	6	8687	4	1874	21	5660	6	919	12.24	10685	5.4	3223.28	41.79	6792	6
mmu-miR-322	32792	62	11700	12	938	17	3431	9	32792	126.48	14391	16.2	1613.36	33.83	4117.2	9
mmu-miR-324	0	1	0	0	487	3	1676	1	0	2.04	0	0	837.64	5.97	2011.2	1
mmu-miR-33	20	1	1	0	1789	2	5	3908	20	2.04	1.23	0	3077.08	3.98	6	3908
mmu-miR-330-5p	1	0	2	0	1242	2	8	5297	1	0	2.46	0	2136.24	3.98	9.6	5297
mmu-miR-335	0	0	0	0	45	0	0	0	0	0	0	0	77.4	0	0	0
mmu-miR-340	1021	8	7084	7	0	2	1	0	1021	16.32	8713.32	9.45	0	3.98	1.2	0
mmu-miR-345-5p	0	0	0	0	46	0	0	0	0	0	0	0	79.12	0	0	0
mmu-miR-34a	0	0	0	0	304	2	680	1	0	0	0	0	522.88	3.98	816	1
mmu-miR-34b-5p	0	0	0	0	0	0	0	282	0	0	0	0	0	0	0	282
mmu-miR-34c	0	2	1	3	84	0	1	6725	0	4.08	1.23	4.05	144.48	0	1.2	6725
mmu-miR-351	0	0	0	0	0	7	1867	2	0	0	0	0	0	13.93	2240.4	2
mmu-miR-361	1	0	0	0	835	10	3503	4	1	0	0	0	1436.2	19.9	4203.6	4
mmu-miR-374	0	1	0	0	1328	0	0	0	0	2.04	0	0	2284.16	0	0	0
mmu-miR-423-5p	11683	42	10347	20	1855	18	716	6141	11683	85.68	12726.8	27	3190.6	35.82	859.2	6141
mmu-miR-425	0	0	74	0	1174	0	1	0	0	0	91.02	0	2019.28	0	1.2	0
mmu-miR-449a	1	0	3	0	104	0	1	9821	1	0	3.69	0	178.88	0	1.2	9821
mmu-miR-450a-2-5p	0	0	0	0	19	0	0	0	0	0	0	0	32.68	0	0	0
mmu-miR-450b-5p	0	0	0	0	312	0	0	0	0	0	0	0	536.64	0	0	0
mmu-miR-466a-5p,mmu-miR-466p-5p	0	0	0	0	407	0	1	0	0	0	0	0	700.04	0	1.2	0
mmu-miR-466b-1-5p,mmu-miR-466b-7-5p,mmu-miR-466b-6-5p,mmu-miR-466e-5p,mmu-miR-466b-8-5p,mmu-miR-466b-3-5p,mmu-miR-466b-2-5p,mmu-miR-466b-4-5p,mmu-miR-466o-5p	0	0	0	0	227	0	0	0	0	0	0	0	390.44	0	0	0
mmu-miR-466c-1-5p,mmu-miR-466c-2-5p	0	0	0	0	103	0	0	0	0	0	0	0	177.16	0	0	0
mmu-miR-466d-5p,mmu-miR-466n-5p	0	0	0	0	246	0	0	0	0	0	0	0	423.12	0	0	0
mmu-miR-466f-3,mmu-miR-466f-1,mmu-miR-466f-2	0	0	0	0	51	0	0	0	0	0	0	0	87.72	0	0	0
mmu-miR-466h	4850	18	7152	5	223	2	1	2	4850	36.72	8796.96	6.75	383.56	3.98	1.2	2
mmu-miR-467a-5,mmu-miR-467a-4,mmu-miR-467a-2,mmu-miR-467a-7,mmu-miR-467a-10,mmu-miR-467b,mmu-miR-467a-3,mmu-miR-467a-6,mmu-miR-467a-9,mmu-miR-467a,mmu-miR-467a-1,mmu-miR-467a-8	0	1	0	0	2010	0	0	0	0	2.04	0	0	3457.2	0	0	0
mmu-miR-467c	0	6	6763	2	1170	1	0	0	0	12.24	8318.49	2.7	2012.4	1.99	0	0
mmu-miR-467d	1	0	19	0	59	0	0	0	1	0	23.37	0	101.48	0	0	0
mmu-miR-470-5p	0	0	0	0	27	0	0	0	0	0	0	0	46.44	0	0	0
mmu-miR-491	0	0	0	0	50	0	0	0	0	0	0	0	86	0	0	0
mmu-miR-497	7486	7	3	1	598	11	2796	4	7486	14.28	3.69	1.35	1028.56	21.89	3355.2	4
mmu-miR-501-5p	0	0	0	0	102	0	0	0	0	0	0	0	175.44	0	0	0
mmu-miR-503	1654	6	2	1	455	1	0	1	1654	12.24	2.46	1.35	782.6	1.99	0	1
mmu-miR-532-5p	0	4	7586	3699	459	876	1	50	0	8.16	9330.78	4993.65	789.48	1743.24	1.2	50
mmu-miR-664-5p	1126	1	0	0	143	0	1	1	1126	2.04	0	0	245.96	0	1.2	1
mmu-miR-669a-13-5p,mmu-miR-669p-1,mmu-miR-669a-7-5p,mmu-miR-669a-12-5p,mmu-miR-669a-9-5p,mmu-miR-669a-8-5p,mmu-miR-669a-10-5p,mmu-miR-669a-2-5p,mmu-miR-669a-4-5p,mmu-miR-669p-2,mmu-miR-669a-11-5p,mmu-miR-669a-6-5p,mmu-miR-669a-1-5p,mmu-miR-669a-3-5p,mmu-miR-669a-5-5p	0	0	0	0	1428	11	3616	3	0	0	0	0	2456.16	21.89	4339.2	3
mmu-miR-669b,mmu-miR-669m-2,mmu-miR-669m-1	1	0	0	1	321	12	4530	4	1	0	0	1.35	552.12	23.88	5436	4
mmu-miR-669d-2,mmu-miR-669d	0	0	0	0	48	0	0	0	0	0	0	0	82.56	0	0	0
mmu-miR-669e	0	0	0	0	30	0	0	0	0	0	0	0	51.6	0	0	0
mmu-miR-669f-5p	26	0	0	0	195	0	1	0	26	0	0	0	335.4	0	1.2	0
mmu-miR-669l	0	0	0	0	67	1	0	1	0	0	0	0	115.24	1.99	0	1
mmu-miR-669o-5p	0	0	0	0	163	0	0	0	0	0	0	0	280.36	0	0	0
mmu-miR-671	0	0	0	0	1902	2	1	0	0	0	0	0	3271.44	3.98	1.2	0
mmu-miR-674-5p	12888	28	14250	9	4867	14	6002	3075	12888	57.12	17527.5	12.15	8371.24	27.86	7202.4	3075
mmu-miR-744	3339	8	8084	319	99	64	18314	25	3339	16.32	9943.32	430.65	170.28	127.36	21976.8	25
mmu-miR-7a-2,mmu-miR-7a-1	14497	57	44044	31	1934	678	20681	19755	14497	116.28	54174.1	41.85	3326.48	1349.22	24817.2	19755
mmu-miR-7b	23	0	16	0	0	0	4	8	23	0	19.68	0	0	0	4.8	8
mmu-miR-872	24167	39	13	2	82	14	6423	8	24167	79.56	15.99	2.7	141.04	27.86	7707.6	8
mmu-miR-877-5p	0	0	0	0	0	0	8	0	0	0	0	0	0	0	9.6	0
mmu-miR-878-5p	0	0	0	0	37	0	0	0	0	0	0	0	63.64	0	0	0
mmu-miR-93	2	9	8591	6	719	87	26460	19	2	18.36	10566.9	8.1	1236.68	173.13	31752	19
mmu-miR-96	39332	166	84835	168	30239	923	53637	89844	39332	338.64	104347	226.8	52011.1	1836.77	64364.4	89844
mmu-miR-98	3790	18	8501	8	2157	16	8112	58	3790	36.72	10456.2	10.8	3710.04	31.84	9734.4	58
mmu-miR-99a	580	3	2	0	6901	1	23	17	580	6.12	2.46	0	11869.7	1.99	27.6	17
mmu-miR-99b	171893	469	105423	107	72290	1656	293449	126896	171893	956.76	129670	144.45	124339	3295.44	352139	126896

## Sheet: Replicate 2 - 5p miRNAs
	RAW READS								NORMALIZED READS (See "Normalization Factors" sheet or Supplementary Table 1)
	WT	KO							WT	KO
miR	mCherry	mCherry	hsDicer	D1320A/D1709A	D1320A	D1709A	K70A	YY971AA	mCherry	mCherry	hsDicer	D1320A/D1709A	D1320A	D1709A	K70A	YY971AA
mmu-let-7a-2,mmu-let-7a-1	33033	177	10088	93	777	27	4964	3012	27087.1	208.86	9583.6	103.23	1274.28	72.36	6850.32	4608.36
mmu-let-7b	113786	388	38101	409	8410	294	17094	3157	93304.5	457.84	36195.9	453.99	13792.4	787.92	23589.7	4830.21
mmu-let-7c-1,mmu-let-7c-2	217184	1099	89109	733	10440	172	36883	8469	178091	1296.82	84653.6	813.63	17121.6	460.96	50898.5	12957.6
mmu-let-7d	23606	93	11557	26	1267	35	7476	1322	19356.9	109.74	10979.1	28.86	2077.88	93.8	10316.9	2022.66
mmu-let-7e	15842	110	5190	24	753	17	3222	234	12990.4	129.8	4930.5	26.64	1234.92	45.56	4446.36	358.02
mmu-let-7f-1,mmu-let-7f-2	36167	131	12372	88	1938	145	7718	1958	29656.9	154.58	11753.4	97.68	3178.32	388.6	10650.8	2995.74
mmu-let-7g	11440	15	3231	9	103	12	2736	2271	9380.8	17.7	3069.45	9.99	168.92	32.16	3775.68	3474.63
mmu-let-7i	116628	409	53814	460	11949	264	49149	7920	95635	482.62	51123.3	510.6	19596.4	707.52	67825.6	12117.6
mmu-miR-100	7147	59	951	5	161	3	1171	469	5860.54	69.62	903.45	5.55	264.04	8.04	1615.98	717.57
mmu-miR-106a	0	0	45	0	0	1	1	0	0	0	42.75	0	0	2.68	1.38	0
mmu-miR-106b	5322	53	2012	179	751	16	2697	753	4364.04	62.54	1911.4	198.69	1231.64	42.88	3721.86	1152.09
mmu-miR-10a	1622	0	0	0	0	0	0	1	1330.04	0	0	0	0	0	0	1.53
mmu-miR-10b	56	0	152	0	32	3	646	7	45.92	0	144.4	0	52.48	8.04	891.48	10.71
mmu-miR-1198-5p	1704	3	1252	5	786	2	1437	592	1397.28	3.54	1189.4	5.55	1289.04	5.36	1983.06	905.76
mmu-miR-122	0	0	0	71	0	0	0	0	0	0	0	78.81	0	0	0	0
mmu-miR-125a	57041	234	16441	128	409	220	28423	3262	46773.6	276.12	15618.9	142.08	670.76	589.6	39223.7	4990.86
mmu-miR-125b-2,mmu-miR-125b-1	205373	623	32887	298	2424	207	44569	22022	168406	735.14	31242.6	330.78	3975.36	554.76	61505.2	33693.7
mmu-miR-126-5p	0	1	38	0	0	0	0	0	0	1.18	36.1	0	0	0	0	0
mmu-miR-129-1-5p	12751	46	412	4	58	2	124	224	10455.8	54.28	391.4	4.44	95.12	5.36	171.12	342.72
mmu-miR-1306	609	0	202	0	103	2	462	219	499.38	0	191.9	0	168.92	5.36	637.56	335.07
mmu-miR-130b-5p	645	0	63	0	208	103	390	114	528.9	0	59.85	0	341.12	276.04	538.2	174.42
mmu-miR-132-5p	147	1	119	2	0	0	318	71	120.54	1.18	113.05	2.22	0	0	438.84	108.63
mmu-miR-135a-2,mmu-miR-135a-1	363	1	88	0	66	0	65	0	297.66	1.18	83.6	0	108.24	0	89.7	0
mmu-miR-135b	181	0	0	0	1	0	2	0	148.42	0	0	0	1.64	0	2.76	0
mmu-miR-138-2,mmu-miR-138-1	0	0	0	0	0	0	158	0	0	0	0	0	0	0	218.04	0
mmu-miR-139	1441	7	3607	6	105	6	1751	226	1181.62	8.26	3426.65	6.66	172.2	16.08	2416.38	345.78
mmu-miR-140-5p	27798	132	7219	24	3137	135	11251	3248	22794.4	155.76	6858.05	26.64	5144.68	361.8	15526.4	4969.44
mmu-miR-145	5055	5	1038	4	0	1	784	126	4145.1	5.9	986.1	4.44	0	2.68	1081.92	192.78
mmu-miR-146a	668	0	169	0	2	1	100	302	547.76	0	160.55	0	3.28	2.68	138	462.06
mmu-miR-146b	1981	5	393	6	29	0	64	122	1624.42	5.9	373.35	6.66	47.56	0	88.32	186.66
mmu-miR-149	1797	3	1516	0	915	10	1838	607	1473.54	3.54	1440.2	0	1500.6	26.8	2536.44	928.71
mmu-miR-151-5p	40973	104	12360	73	2864	50	11043	5578	33597.9	122.72	11742	81.03	4696.96	134	15239.3	8534.34
mmu-miR-155	3290	3	763	2	219	4	830	521	2697.8	3.54	724.85	2.22	359.16	10.72	1145.4	797.13
mmu-miR-15a	10882	20	2574	10	701	132	3741	147	8923.24	23.6	2445.3	11.1	1149.64	353.76	5162.58	224.91
mmu-miR-15b	26358	254	10771	320	3741	172	7259	6988	21613.6	299.72	10232.4	355.2	6135.24	460.96	10017.4	10691.6
mmu-miR-16-1,mmu-miR-16-2	138015	573	46506	687	6895	370	59322	27911	113172	676.14	44180.7	762.57	11307.8	991.6	81864.4	42703.8
mmu-miR-17	5558	10	4097	6	735	38	7114	1707	4557.56	11.8	3892.15	6.66	1205.4	101.84	9817.32	2611.71
mmu-miR-181a-2,mmu-miR-181a-1	7216	47	2081	80	615	17	2936	686	5917.12	55.46	1976.95	88.8	1008.6	45.56	4051.68	1049.58
mmu-miR-181b-2,mmu-miR-181b-1	4887	90	2064	17	261	9	2533	260	4007.34	106.2	1960.8	18.87	428.04	24.12	3495.54	397.8
mmu-miR-181d	75	0	32	0	62	0	85	81	61.5	0	30.4	0	101.68	0	117.3	123.93
mmu-miR-182	9203	30	8998	154	2166	61	13194	5183	7546.46	35.4	8548.1	170.94	3552.24	163.48	18207.7	7929.99
mmu-miR-183	12287	207	13433	41	1832	51	10176	1996	10075.3	244.26	12761.3	45.51	3004.48	136.68	14042.9	3053.88
mmu-miR-1839	139	0	37	0	0	0	0	47	113.98	0	35.15	0	0	0	0	71.91
mmu-miR-185	3478	5	1201	9	405	11	1857	126	2851.96	5.9	1140.95	9.99	664.2	29.48	2562.66	192.78
mmu-miR-186	2539	7	1465	2	279	16	3074	1111	2081.98	8.26	1391.75	2.22	457.56	42.88	4242.12	1699.83
mmu-miR-188	2954	6	485	1	0	4	1055	343	2422.28	7.08	460.75	1.11	0	10.72	1455.9	524.79
mmu-miR-18a	2019	3	1004	64	159	14	2499	802	1655.58	3.54	953.8	71.04	260.76	37.52	3448.62	1227.06
mmu-miR-18b	0	0	0	0	0	0	0	1	0	0	0	0	0	0	0	1.53
mmu-miR-190	187	0	42	0	0	0	0	0	153.34	0	39.9	0	0	0	0	0
mmu-miR-190b	77	0	0	0	1	0	162	0	63.14	0	0	0	1.64	0	223.56	0
mmu-miR-191	9963	21	3450	7	6	18	4860	482	8169.66	24.78	3277.5	7.77	9.84	48.24	6706.8	737.46
mmu-miR-192	870	2	291	1	71	2	531	858	713.4	2.36	276.45	1.11	116.44	5.36	732.78	1312.74
mmu-miR-193-5p	642	40	393	2	3974	2	514	274	526.44	47.2	373.35	2.22	6517.36	5.36	709.32	419.22
mmu-miR-1930	0	0	1	0	0	0	71	0	0	0	0.95	0	0	0	97.98	0
mmu-miR-1934	1	0	94	0	0	0	14	0	0.82	0	89.3	0	0	0	19.32	0
mmu-miR-194-2,mmu-miR-194-1	269	0	117	2	60	1	257	136	220.58	0	111.15	2.22	98.4	2.68	354.66	208.08
mmu-miR-1943	66	0	0	0	0	0	0	0	54.12	0	0	0	0	0	0	0
mmu-miR-1947	39	0	38	1	0	0	0	0	31.98	0	36.1	1.11	0	0	0	0
mmu-miR-195	8294	13	1917	4	773	8	1683	1920	6801.08	15.34	1821.15	4.44	1267.72	21.44	2322.54	2937.6
mmu-miR-1955-5p	136	0	108	0	0	0	24	98	111.52	0	102.6	0	0	0	33.12	149.94
mmu-miR-1964-5p	0	0	38	0	0	0	0	0	0	0	36.1	0	0	0	0	0
mmu-miR-1968	0	0	33	0	0	0	0	0	0	0	31.35	0	0	0	0	0
mmu-miR-196a-2,mmu-miR-196a-1	18023	23	7078	15	1490	18	3831	4133	14778.9	27.14	6724.1	16.65	2443.6	48.24	5286.78	6323.49
mmu-miR-196b	8963	12	3909	277	880	20	4345	514	7349.66	14.16	3713.55	307.47	1443.2	53.6	5996.1	786.42
mmu-miR-1981-5p	56	0	138	0	0	3	935	1	45.92	0	131.1	0	0	8.04	1290.3	1.53
mmu-miR-199a-1-5p,mmu-miR-199a-2-5p	29286	159	7930	173	1854	50	11960	4448	24014.5	187.62	7533.5	192.03	3040.56	134	16504.8	6805.44
mmu-miR-205	150	0	0	0	1	0	0	0	123	0	0	0	1.64	0	0	0
mmu-miR-20a	4530	64	2351	6	588	8	5575	1471	3714.6	75.52	2233.45	6.66	964.32	21.44	7693.5	2250.63
mmu-miR-20b	15	0	0	0	0	0	10	5	12.3	0	0	0	0	0	13.8	7.65
mmu-miR-21	1034310	13340	351476	26479	39916	8254	323244	66806	848134	15741.2	333902	29391.7	65462.2	22120.7	446077	102213
mmu-miR-212-5p	49	0	42	0	0	0	228	144	40.18	0	39.9	0	0	0	314.64	220.32
mmu-miR-214	21331	20	6228	67	1997	16	4402	2604	17491.4	23.6	5916.6	74.37	3275.08	42.88	6074.76	3984.12
mmu-miR-218-2,mmu-miR-218-1	557	0	0	0	0	0	0	0	456.74	0	0	0	0	0	0	0
mmu-miR-219-1	98	1	0	0	0	1	141	0	80.36	1.18	0	0	0	2.68	194.58	0
mmu-miR-219-2-5p	100	0	0	0	0	0	0	0	82	0	0	0	0	0	0	0
mmu-miR-224	1132	9	683	1	484	1	772	349	928.24	10.62	648.85	1.11	793.76	2.68	1065.36	533.97
mmu-miR-26a-1,mmu-miR-26a-2	147883	475	32131	448	5489	190	35225	22542	121264	560.5	30524.4	497.28	9001.96	509.2	48610.5	34489.3
mmu-miR-26b	20172	39	10752	132	1156	39	7891	848	16541	46.02	10214.4	146.52	1895.84	104.52	10889.6	1297.44
mmu-miR-28-5p	16610	24	3303	17	538	15	4654	2780	13620.2	28.32	3137.85	18.87	882.32	40.2	6422.52	4253.4
mmu-miR-296-5p	56	0	0	0	0	0	0	0	45.92	0	0	0	0	0	0	0
mmu-miR-297a-3-5p,mmu-miR-297a-4-5p,mmu-miR-297a-5-5p	1989	14	1428	3	262	10	2280	417	1630.98	16.52	1356.6	3.33	429.68	26.8	3146.4	638.01
mmu-miR-297b-5p	548	0	183	0	181	3	213	0	449.36	0	173.85	0	296.84	8.04	293.94	0
mmu-miR-297c-5p	496	3	420	0	0	1	332	189	406.72	3.54	399	0	0	2.68	458.16	289.17
mmu-miR-3057-5p	104	0	82	0	51	0	0	0	85.28	0	77.9	0	83.64	0	0	0
mmu-miR-3058	86	0	0	0	0	0	0	0	70.52	0	0	0	0	0	0	0
mmu-miR-3061-5p	49	0	13	0	0	0	0	0	40.18	0	12.35	0	0	0	0	0
mmu-miR-3068	4889	54	2534	5	913	9	1856	633	4008.98	63.72	2407.3	5.55	1497.32	24.12	2561.28	968.49
mmu-miR-3079-5p	0	0	0	69	0	0	0	0	0	0	0	76.59	0	0	0	0
mmu-miR-3096-5p	0	0	0	0	0	0	0	62	0	0	0	0	0	0	0	94.86
mmu-miR-3098-5p	52	0	0	0	0	0	0	0	42.64	0	0	0	0	0	0	0
mmu-miR-30a	25971	181	9501	117	3225	50	9980	4797	21296.2	213.58	9025.95	129.87	5289	134	13772.4	7339.41
mmu-miR-30b	5116	6	2128	6	358	157	4313	1895	4195.12	7.08	2021.6	6.66	587.12	420.76	5951.94	2899.35
mmu-miR-30c-2,mmu-miR-30c-1	18585	61	8266	25	182	43	9036	2881	15239.7	71.98	7852.7	27.75	298.48	115.24	12469.7	4407.93
mmu-miR-30d	30660	138	20221	145	3237	78	18107	6001	25141.2	162.84	19210	160.95	5308.68	209.04	24987.7	9181.53
mmu-miR-30e	23982	33	7052	119	663	33	10041	7063	19665.2	38.94	6699.4	132.09	1087.32	88.44	13856.6	10806.4
mmu-miR-31	248138	1315	115383	1017	29327	812	144426	72297	203473	1551.7	109614	1128.87	48096.3	2176.16	199308	110614
mmu-miR-3102.2-5p	25	0	2	0	0	0	0	0	20.5	0	1.9	0	0	0	0	0
mmu-miR-3108	0	0	1	0	0	1	73	0	0	0	0.95	0	0	2.68	100.74	0
mmu-miR-32	34302	54	8388	127	498	37	10397	2602	28127.6	63.72	7968.6	140.97	816.72	99.16	14347.9	3981.06
mmu-miR-322	30675	184	5038	14	596	33	6129	2761	25153.5	217.12	4786.1	15.54	977.44	88.44	8458.02	4224.33
mmu-miR-324	5312	8	1851	4	122	19	4647	51	4355.84	9.44	1758.45	4.44	200.08	50.92	6412.86	78.03
mmu-miR-33	17355	65	1002	2	599	10	1665	3128	14231.1	76.7	951.9	2.22	982.36	26.8	2297.7	4785.84
mmu-miR-330-5p	243	0	145	0	135	1	227	171	199.26	0	137.75	0	221.4	2.68	313.26	261.63
mmu-miR-339	113	0	137	2	36	0	33	69	92.66	0	130.15	2.22	59.04	0	45.54	105.57
mmu-miR-340	367	4	507	89	0	0	211	1	300.94	4.72	481.65	98.79	0	0	291.18	1.53
mmu-miR-345-5p	94	0	104	0	83	3	261	0	77.08	0	98.8	0	136.12	8.04	360.18	0
mmu-miR-34a	2898	14	625	6	53	3	725	72	2376.36	16.52	593.75	6.66	86.92	8.04	1000.5	110.16
mmu-miR-34b-5p	320	0	0	0	0	0	0	0	262.4	0	0	0	0	0	0	0
mmu-miR-34c	1678	0	79	0	80	0	146	78	1375.96	0	75.05	0	131.2	0	201.48	119.34
mmu-miR-351	1761	2	122	0	0	1	526	78	1444.02	2.36	115.9	0	0	2.68	725.88	119.34
mmu-miR-361	1777	2	813	4	103	6	761	640	1457.14	2.36	772.35	4.44	168.92	16.08	1050.18	979.2
mmu-miR-362-5p	40	0	50	0	0	0	88	0	32.8	0	47.5	0	0	0	121.44	0
mmu-miR-374	4350	4	1289	5	385	49	2405	56	3567	4.72	1224.55	5.55	631.4	131.32	3318.9	85.68
mmu-miR-379	0	0	0	0	0	0	9	0	0	0	0	0	0	0	12.42	0
mmu-miR-423-5p	3162	117	1891	87	568	142	2002	262	2592.84	138.06	1796.45	96.57	931.52	380.56	2762.76	400.86
mmu-miR-425	10832	74	5291	15	1252	23	2829	450	8882.24	87.32	5026.45	16.65	2053.28	61.64	3904.02	688.5
mmu-miR-449a	240	0	3	0	0	0	111	0	196.8	0	2.85	0	0	0	153.18	0
mmu-miR-450a-2-5p,mmu-miR-450a-1	416	1	124	1	62	0	2	154	341.12	1.18	117.8	1.11	101.68	0	2.76	235.62
mmu-miR-450b-5p	591	85	216	2	7	0	5	0	484.62	100.3	205.2	2.22	11.48	0	6.9	0
mmu-miR-451	0	54	0	91	0	0	0	0	0	63.72	0	101.01	0	0	0	0
mmu-miR-452-5p	407	0	132	0	0	0	167	0	333.74	0	125.4	0	0	0	230.46	0
mmu-miR-455-5p	266	0	0	0	0	0	0	0	218.12	0	0	0	0	0	0	0
mmu-miR-466a-5p,mmu-miR-466p-5p	327	0	40	0	768	0	386	170	268.14	0	38	0	1259.52	0	532.68	260.1
mmu-miR-466b-7-5p,mmu-miR-466b-3-5p,mmu-miR-466e-5p,mmu-miR-466b-6-5p,mmu-miR-466b-1-5p,mmu-miR-466b-2-5p,mmu-miR-466b-4-5p,mmu-miR-466b-9-5p,mmu-miR-466b-5-5p,mmu-miR-466b-8-5p,mmu-miR-466o-5p	537	0	259	1	49	3	96	2	440.34	0	246.05	1.11	80.36	8.04	132.48	3.06
mmu-miR-466c-1-5p,mmu-miR-466c-2-5p,mmu-miR-466c-5p	1143	0	360	6	1	1	500	504	937.26	0	342	6.66	1.64	2.68	690	771.12
mmu-miR-466f-2,mmu-miR-466f-1,mmu-miR-466f-3	492	0	415	0	145	0	317	63	403.44	0	394.25	0	237.8	0	437.46	96.39
mmu-miR-466h	3528	5	1642	2	261	12	2667	957	2892.96	5.9	1559.9	2.22	428.04	32.16	3680.46	1464.21
mmu-miR-466k	0	1	0	0	70	0	0	0	0	1.18	0	0	114.8	0	0	0
mmu-miR-466m-5p	1	0	1	0	0	0	0	0	0.82	0	0.95	0	0	0	0	0
mmu-miR-466n-5p,mmu-miR-466d-5p	372	0	136	0	155	1	425	0	305.04	0	129.2	0	254.2	2.68	586.5	0
mmu-miR-467a-4,mmu-miR-467a-10,mmu-miR-467a-8,mmu-miR-467b,mmu-miR-467a-9,mmu-miR-467a-3,mmu-miR-467a-5,mmu-miR-467a-6,mmu-miR-467a-7,mmu-miR-467a,mmu-miR-467a-2,mmu-miR-467a-1	15596	96	2833	146	1733	48	7949	2781	12788.7	113.28	2691.35	162.06	2842.12	128.64	10969.6	4254.93
mmu-miR-467c	4715	14	1955	3	962	13	3231	1405	3866.3	16.52	1857.25	3.33	1577.68	34.84	4458.78	2149.65
mmu-miR-467d	1752	3	2	0	212	3	821	1047	1436.64	3.54	1.9	0	347.68	8.04	1132.98	1601.91
mmu-miR-467e	660	1	496	0	1	1	477	113	541.2	1.18	471.2	0	1.64	2.68	658.26	172.89
mmu-miR-470-5p	0	0	20	0	0	0	0	0	0	0	19	0	0	0	0	0
mmu-miR-486,mmu-miR-3107	135	0	40	0	1	0	301	0	110.7	0	38	0	1.64	0	415.38	0
mmu-miR-491	6	0	0	0	0	0	0	0	4.92	0	0	0	0	0	0	0
mmu-miR-497	8860	12	2616	8	2888	12	2252	1503	7265.2	14.16	2485.2	8.88	4736.32	32.16	3107.76	2299.59
mmu-miR-499	0	0	14	0	0	0	0	73	0	0	13.3	0	0	0	0	111.69
mmu-miR-501-5p	177	0	132	0	105	0	68	0	145.14	0	125.4	0	172.2	0	93.84	0
mmu-miR-503	1757	1	532	3	262	141	1138	154	1440.74	1.18	505.4	3.33	429.68	377.88	1570.44	235.62
mmu-miR-505-5p	86	0	164	0	0	0	101	0	70.52	0	155.8	0	0	0	139.38	0
mmu-miR-532-5p	1049	121	593	426	237	260	1181	325	860.18	142.78	563.35	472.86	388.68	696.8	1629.78	497.25
mmu-miR-664-5p	438	1	195	0	188	3	237	227	359.16	1.18	185.25	0	308.32	8.04	327.06	347.31
mmu-miR-669a-7-5p,mmu-miR-669a-13-5p,mmu-miR-669a-3-5p,mmu-miR-669a-6-5p,mmu-miR-669a-8-5p,mmu-miR-669a-4-5p,mmu-miR-669a-9-5p,mmu-miR-669a-10-5p,mmu-miR-669a-12-5p,mmu-miR-669a-2-5p,mmu-miR-669p-2,mmu-miR-669a-11-5p,mmu-miR-669a-5-5p,mmu-miR-669a-1-5p,mmu-miR-669p-1	3430	41	1741	66	1234	8	1571	2295	2812.6	48.38	1653.95	73.26	2023.76	21.44	2167.98	3511.35
mmu-miR-669b,mmu-miR-669m-1,mmu-miR-669m-2	3772	4	1338	2	288	1	851	1208	3093.04	4.72	1271.1	2.22	472.32	2.68	1174.38	1848.24
mmu-miR-669c	467	0	346	0	0	0	359	0	382.94	0	328.7	0	0	0	495.42	0
mmu-miR-669d-2,mmu-miR-669d	694	0	72	0	0	0	155	541	569.08	0	68.4	0	0	0	213.9	827.73
mmu-miR-669e	338	2	221	0	0	1	170	37	277.16	2.36	209.95	0	0	2.68	234.6	56.61
mmu-miR-669f-5p	345	0	292	1	183	0	116	228	282.9	0	277.4	1.11	300.12	0	160.08	348.84
mmu-miR-669h	216	1	131	2	0	0	65	0	177.12	1.18	124.45	2.22	0	0	89.7	0
mmu-miR-669l	729	0	120	0	1	3	428	0	597.78	0	114	0	1.64	8.04	590.64	0
mmu-miR-669o-5p	355	0	71	0	35	1	201	0	291.1	0	67.45	0	57.4	2.68	277.38	0
mmu-miR-671	953	1	415	0	1245	5	768	719	781.46	1.18	394.25	0	2041.8	13.4	1059.84	1100.07
mmu-miR-674-5p	7623	17	2830	53	461	11	3192	2214	6250.86	20.06	2688.5	58.83	756.04	29.48	4404.96	3387.42
mmu-miR-676-5p	648	0	0	0	0	0	0	0	531.36	0	0	0	0	0	0	0
mmu-miR-700-5p	80	0	0	0	0	1	154	0	65.6	0	0	0	0	2.68	212.52	0
mmu-miR-701	97	0	0	0	0	0	0	0	79.54	0	0	0	0	0	0	0
mmu-miR-708	165	0	80	70	0	2	261	0	135.3	0	76	77.7	0	5.36	360.18	0
mmu-miR-744	4798	10	2914	73	2	10	2213	145	3934.36	11.8	2768.3	81.03	3.28	26.8	3053.94	221.85
mmu-miR-760-5p	0	0	0	0	0	0	11	0	0	0	0	0	0	0	15.18	0
mmu-miR-7a-2,mmu-miR-7a-1	2387	18	3122	7	529	5	2271	898	1957.34	21.24	2965.9	7.77	867.56	13.4	3133.98	1373.94
mmu-miR-7b	3	0	52	0	0	0	0	0	2.46	0	49.4	0	0	0	0	0
mmu-miR-872	11911	48	1740	95	63	19	2755	517	9767.02	56.64	1653	105.45	103.32	50.92	3801.9	791.01
mmu-miR-877-5p	1	0	202	0	0	0	182	0	0.82	0	191.9	0	0	0	251.16	0
mmu-miR-9-2,mmu-miR-9-1,mmu-miR-9-3	942	0	30	0	0	0	0	107	772.44	0	28.5	0	0	0	0	163.71
mmu-miR-93	3716	3	2168	2	44	16	4886	412	3047.12	3.54	2059.6	2.22	72.16	42.88	6742.68	630.36
mmu-miR-96	115596	792	94738	829	9570	751	91908	37741	94788.7	934.56	90001.1	920.19	15694.8	2012.68	126833	57743.7
mmu-miR-98	1902	6	1911	7	644	6	1268	60	1559.64	7.08	1815.45	7.77	1056.16	16.08	1749.84	91.8
mmu-miR-99a	54619	201	15002	357	2655	100	20820	10502	44787.6	237.18	14251.9	396.27	4354.2	268	28731.6	16068.1
mmu-miR-99b	117081	374	54834	617	23363	519	105496	11398	96006.4	441.32	52092.3	684.87	38315.3	1390.92	145584	17438.9
TOTAL:	3345513	23442	1224316	36403	216369	14754	1259791	409763	2.74332e+06	27661.6	1.1631e+06	40407.3	354845	39540.7	1.73851e+06	626937

## Sheet: Replicate 1 - 3p miRNAs
	RAW READS								NORMALIZED READS (See "Normalization Factors" sheet or Supplementary Table 1)
	WT	KO							WT	KO
miR	mCherry	mCherry	hsDicer	D1320A/D1709A	D1320A	D1709A	K70A	YY971AA	mCherry	mCherry	hsDicer	D1320A/D1709A	D1320A	D1709A	K70A	YY971AA
mmu-miR-22	3425400	32374	1750939	21000	3657	516430	1471524	1878924	3425400	66043	2.15365e+06	28350	6290.04	1.0277e+06	1.76583e+06	1878924
mmu-miR-29b-2,mmu-miR-29b-1	358626	1432	634380	4731	1503	257037	371125	424824	358626	2921.28	780287	6386.85	2585.16	511504	445350	424824
mmu-miR-24-1,mmu-miR-24-2	159026	472	123766	99	535	88593	51043	44163	159026	962.88	152232	133.65	920.2	176300	61251.6	44163
mmu-miR-143	91935	278	38674	37	63	4209	52364	61349	91935	567.12	47569	49.95	108.36	8375.91	62836.8	61349
mmu-miR-148a	52218	129	7877	12	14	1766	3760	6484	52218	263.16	9688.71	16.2	24.08	3514.34	4512	6484
mmu-miR-29a	45720	141	50495	41	165	5561	39434	128164	45720	287.64	62108.8	55.35	283.8	11066.4	47320.8	128164
mmu-miR-28-3p	44967	140	30439	18	98	9390	7787	29735	44967	285.6	37440	24.3	168.56	18686.1	9344.4	29735
mmu-miR-199a-2-3p,mmu-miR-199a-1-3p,mmu-miR-199b	40190	76	34	10	26	1178	17772	24156	40190	155.04	41.82	13.5	44.72	2344.22	21326.4	24156
mmu-miR-130a	34146	93	15	5	55	8329	11581	17	34146	189.72	18.45	6.75	94.6	16574.7	13897.2	17
mmu-miR-140-3p	27485	79	20079	16	22	627	11688	22134	27485	161.16	24697.2	21.6	37.84	1247.73	14025.6	22134
mmu-miR-328	21646	77	12232	2614	14	240	16288	8179	21646	157.08	15045.4	3528.9	24.08	477.6	19545.6	8179
mmu-miR-423-3p	21189	118	41029	41	59	11206	38818	40870	21189	240.72	50465.7	55.35	101.48	22299.9	46581.6	40870
mmu-miR-92a-1	18511	84	38584	33	92	15246	27276	47474	18511	171.36	47458.3	44.55	158.24	30339.5	32731.2	47474
mmu-miR-27b	17455	77	34946	19	10	1396	2819	7224	17455	157.08	42983.6	25.65	17.2	2778.04	3382.8	7224
mmu-miR-320	16596	44	8887	6	10	1470	12332	11028	16596	89.76	10931	8.1	17.2	2925.3	14798.4	11028
mmu-miR-221	14224	44	6266	4	82	6483	9042	7970	14224	89.76	7707.18	5.4	141.04	12901.2	10850.4	7970
mmu-miR-25	13552	30	6	3	13	1699	17669	6008	13552	61.2	7.38	4.05	22.36	3381.01	21202.8	6008
mmu-miR-615	13255	31	6	1	0	0	8	0	13255	63.24	7.38	1.35	0	0	9.6	0
mmu-miR-193-3p	11618	30	19346	12	26	7639	5716	23731	11618	61.2	23795.6	16.2	44.72	15201.6	6859.2	23731
mmu-miR-378	9703	75	60912	45	32	5151	40439	15658	9703	153	74921.8	60.75	55.04	10250.5	48526.8	15658
mmu-miR-148b	9023	21	4	0	1	1611	6	11	9023	42.84	4.92	0	1.72	3205.89	7.2	11
mmu-miR-676-3p	7714	12	4	2	0	0	1	1	7714	24.48	4.92	2.7	0	0	1.2	1
mmu-miR-27a	6642	13681	245	4	9	1547	4350	5833	6642	27909.2	301.35	5.4	15.48	3078.53	5220	5833
mmu-miR-103-1,mmu-miR-103-2	5265	22	7090	4	10	391	13404	10	5265	44.88	8720.7	5.4	17.2	778.09	16084.8	10
mmu-miR-23b	4732	19	2	1	2	1739	9	0	4732	38.76	2.46	1.35	3.44	3460.61	10.8	0
mmu-miR-500	3966	11	2	1	6	159	5	6729	3966	22.44	2.46	1.35	10.32	316.41	6	6729
mmu-miR-151-3p	3349	8	11	2	79	413	13691	11133	3349	16.32	13.53	2.7	135.88	821.87	16429.2	11133
mmu-miR-210	3326	11	0	0	0	147	0	0	3326	22.44	0	0	0	292.53	0	0
mmu-miR-101a	2479	5	9	0	0	0	5	2	2479	10.2	11.07	0	0	0	6	2
mmu-miR-23a	2286	3	1	2	1	1460	6315	6	2286	6.12	1.23	2.7	1.72	2905.4	7578	6
mmu-miR-126-3p	1221	12	6730	4	6	1364	11221	7844	1221	24.48	8277.9	5.4	10.32	2714.36	13465.2	7844
mmu-miR-29c	46	0	31	0	0	1	26	388	46	0	38.13	0	0	1.99	31.2	388
mmu-miR-92a-2	22	1	2212	1	7	2023	17	8939	22	2.04	2720.76	1.35	12.04	4025.77	20.4	8939
mmu-miR-466c-2-3p,mmu-miR-466b-2-3p,mmu-miR-466b-1-3p,mmu-miR-466c-3p,mmu-miR-466b-6-3p,mmu-miR-466b-4-3p,mmu-miR-466b-8-3p	12	1	0	0	0	221	0	0	12	2.04	0	0	0	439.79	0	0
mmu-miR-206	4	6	3	2	18	4320	10988	18037	4	12.24	3.69	2.7	30.96	8596.8	13185.6	18037
mmu-miR-652	3	3	2	0	15	1231	9157	4971	3	6.12	2.46	0	25.8	2449.69	10988.4	4971
mmu-miR-101b	2	7	9100	4	6	409	2060	3	2	14.28	11193	5.4	10.32	813.91	2472	3
mmu-miR-1964-3p	2	2	3746	1	0	0	0	0	2	4.08	4607.58	1.35	0	0	0	0
mmu-miR-222	1	0	4	0	0	200	2	0	1	0	4.92	0	0	398	2.4	0
mmu-miR-107	1	0	6533	0	0	0	3	0	1	0	8035.59	0	0	0	3.6	0
mmu-miR-350	1	0	0	0	1	697	0	0	1	0	0	0	1.72	1387.03	0	0
mmu-miR-365-2,mmu-miR-365-1	1	0	0	0	3	1849	0	1	1	0	0	0	5.16	3679.51	0	1
mmu-miR-1-2-as	0	0	0	0	0	209	0	0	0	0	0	0	0	415.91	0	0
mmu-miR-674-3p	0	0	1	0	2	994	0	0	0	0	1.23	0	3.44	1978.06	0	0
mmu-miR-381	0	0	0	0	0	249	0	0	0	0	0	0	0	495.51	0	0
mmu-miR-294	0	0	0	0	0	1149	1	0	0	0	0	0	0	2286.51	1.2	0
mmu-miR-1189	0	0	0	0	0	258	0	0	0	0	0	0	0	513.42	0	0
mmu-miR-342	0	0	0	0	1	589	0	0	0	0	0	0	1.72	1172.11	0	0
mmu-miR-132-3p	0	2	1	1	6	973	2986	6960	0	4.08	1.23	1.35	10.32	1936.27	3583.2	6960
mmu-miR-542	0	0	0	0	0	200	0	0	0	0	0	0	0	398	0	0
mmu-miR-193b	0	0	0	0	0	889	0	0	0	0	0	0	0	1769.11	0	0
mmu-miR-532-3p	0	0	0	0	0	172	0	0	0	0	0	0	0	342.28	0	0
mmu-miR-1198-3p	0	0	0	0	0	363	0	2	0	0	0	0	0	722.37	0	2
mmu-miR-19a	0	1	0	0	3	1205	0	0	0	2.04	0	0	5.16	2397.95	0	0
mmu-miR-152	0	0	0	0	0	134	0	0	0	0	0	0	0	266.66	0	0
mmu-miR-92b	0	0	0	0	0	3	2	23	0	0	0	0	0	5.97	2.4	23
mmu-miR-297a-3-3p,mmu-miR-297c-3p,mmu-miR-297a-4-3p,mmu-miR-297b-3p	0	0	0	0	1	343	0	0	0	0	0	0	1.72	682.57	0	0
mmu-miR-326	0	0	0	0	0	170	0	0	0	0	0	0	0	338.3	0	0
mmu-miR-501-3p	0	0	0	0	1	1	778	1	0	0	0	0	1.72	1.99	933.6	1
mmu-miR-1982	0	0	0	0	0	1	0	0	0	0	0	0	0	1.99	0	0
mmu-miR-669a-6-3p,mmu-miR-669a-12-3p,mmu-miR-669a-13-3p,mmu-miR-669o-3p,mmu-miR-669a-11-3p,mmu-miR-669a-8-3p,mmu-miR-669a-7-3p,mmu-miR-669a-9-3p,mmu-miR-669a-4-3p	0	0	0	0	0	463	0	0	0	0	0	0	0	921.37	0	0
mmu-miR-128-2,mmu-miR-128-1	0	0	1	0	0	166	0	0	0	0	1.23	0	0	330.34	0	0
mmu-miR-450b-3p	0	0	0	0	0	136	0	0	0	0	0	0	0	270.64	0	0
mmu-miR-669a-1-3p	0	0	0	0	0	1	0	0	0	0	0	0	0	1.99	0	0
mmu-miR-669f-3p	0	0	0	0	1	534	0	0	0	0	0	0	1.72	1062.66	0	0
mmu-miR-34b-3p	0	0	0	0	0	360	0	0	0	0	0	0	0	716.4	0	0
mmu-miR-664-3p	0	0	0	0	0	297	0	0	0	0	0	0	0	591.03	0	0
mmu-miR-203	0	0	0	0	0	11	0	0	0	0	0	0	0	21.89	0	0
mmu-miR-19b-2,mmu-miR-19b-1	0	2	1186	1	1	2372	1	0	0	4.08	1458.78	1.35	1.72	4720.28	1.2	0
mmu-miR-130b-3p	0	0	2	1	72	1332	5373	7	0	0	2.46	1.35	123.84	2650.68	6447.6	7

## Sheet: Replicate 2 - 3p miRNAs
	RAW READS								NORMALIZED READS (See "Normalization Factors" sheet or Supplementary Table 1)
	WT	KO							WT	KO
miR	mCherry	mCherry	hsDicer	D1320A/D1709A	D1320A	D1709A	K70A	YY971AA	mCherry	mCherry	hsDicer	D1320A/D1709A	D1320A	D1709A	K70A	YY971AA
mmu-miR-22	2492304	8193	857090	7415	1772	297396	1182695	397077	2.04369e+06	9667.74	814236	8230.65	2906.08	797021	1.63212e+06	607528
mmu-miR-29b-1,mmu-miR-29b-2	1170867	3725	482754	3484	487	54818	472952	165955	960111	4395.5	458616	3867.24	798.68	146912	652674	253911
mmu-miR-24-1,mmu-miR-24-2	577259	1784	220503	2006	318	23152	202372	50751	473352	2105.12	209478	2226.66	521.52	62047.4	279273	77649
mmu-miR-143	163532	360	10058	399	57	1675	15446	2385	134096	424.8	9555.1	442.89	93.48	4489	21315.5	3649.05
mmu-miR-130a	94637	322	9992	38	15	1883	11547	6166	77602.3	379.96	9492.4	42.18	24.6	5046.44	15934.9	9433.98
mmu-miR-27a	61347	65	7042	30	16	1175	20215	22355	50304.5	76.7	6689.9	33.3	26.24	3149	27896.7	34203.2
mmu-miR-27b	58565	275	6890	109	8	747	16089	1681	48023.3	324.5	6545.5	120.99	13.12	2001.96	22202.8	2571.93
mmu-miR-29a	50044	140	13817	66	14	1615	19566	14323	41036.1	165.2	13126.1	73.26	22.96	4328.2	27001.1	21914.2
mmu-miR-148a	37524	139	7933	27	7	1154	8450	677	30769.7	164.02	7536.35	29.97	11.48	3092.72	11661	1035.81
mmu-miR-92a-1	28284	62	18112	55	65	2485	17999	8887	23192.9	73.16	17206.4	61.05	106.6	6659.8	24838.6	13597.1
mmu-miR-193-3p	26177	43	8747	83	14	2873	12938	9915	21465.1	50.74	8309.65	92.13	22.96	7699.64	17854.4	15170
mmu-miR-28-3p	26098	23	4426	29	5	1956	4898	5006	21400.4	27.14	4204.7	32.19	8.2	5242.08	6759.24	7659.18
mmu-miR-23b	21737	134	4723	24	5	20	4012	481	17824.3	158.12	4486.85	26.64	8.2	53.6	5536.56	735.93
mmu-miR-423-3p	20074	299	10890	85	11	2291	14885	1884	16460.7	352.82	10345.5	94.35	18.04	6139.88	20541.3	2882.52
mmu-miR-221	18935	67	6944	25	8	1533	10027	1903	15526.7	79.06	6596.8	27.75	13.12	4108.44	13837.3	2911.59
mmu-miR-140-3p	17487	70	2906	11	2	203	6207	1287	14339.3	82.6	2760.7	12.21	3.28	544.04	8565.66	1969.11
mmu-miR-23a	15633	62	4728	14	6	133	10275	1919	12819.1	73.16	4491.6	15.54	9.84	356.44	14179.5	2936.07
mmu-miR-25	14743	39	7483	23	3	471	6035	2577	12089.3	46.02	7108.85	25.53	4.92	1262.28	8328.3	3942.81
mmu-miR-328	13143	69	5112	15	5	18	6685	3312	10777.3	81.42	4856.4	16.65	8.2	48.24	9225.3	5067.36
mmu-miR-199b,mmu-miR-199a-2-3p,mmu-miR-199a-1-3p	11464	16	2696	13	3	324	4054	2945	9400.48	18.88	2561.2	14.43	4.92	868.32	5594.52	4505.85
mmu-miR-222	9969	15	1918	71	2	14	2959	475	8174.58	17.7	1822.1	78.81	3.28	37.52	4083.42	726.75
mmu-miR-320	7116	11	3146	8	37	1077	4497	1407	5835.12	12.98	2988.7	8.88	60.68	2886.36	6205.86	2152.71
mmu-miR-615	6258	5	636	1	1	8	1465	208	5131.56	5.9	604.2	1.11	1.64	21.44	2021.7	318.24
mmu-miR-151-3p	6123	3	1807	6	1	13	3051	1039	5020.86	3.54	1716.65	6.66	1.64	34.84	4210.38	1589.67
mmu-miR-193b	5275	35	2467	5	2	126	2029	953	4325.5	41.3	2343.65	5.55	3.28	337.68	2800.02	1458.09
mmu-miR-669a-12-3p,mmu-miR-669a-7-3p,mmu-miR-669a-9-3p,mmu-miR-669a-13-3p,mmu-miR-669a-3-3p,mmu-miR-669o-3p,mmu-miR-669a-5-3p,mmu-miR-669a-8-3p,mmu-miR-669a-6-3p,mmu-miR-669a-10-3p,mmu-miR-669a-11-3p,mmu-miR-669a-4-3p,mmu-miR-669a-2-3p	5027	10	2641	9	2	420	3838	1086	4122.14	11.8	2508.95	9.99	3.28	1125.6	5296.44	1661.58
mmu-miR-126-3p	4781	4	946	2	0	458	1195	666	3920.42	4.72	898.7	2.22	0	1227.44	1649.1	1018.98
mmu-miR-652	4455	14	2977	1	4	461	5919	1463	3653.1	16.52	2828.15	1.11	6.56	1235.48	8168.22	2238.39
mmu-miR-19b-1,mmu-miR-19b-2	4380	5	1941	12	1	989	4817	1092	3591.6	5.9	1843.95	13.32	1.64	2650.52	6647.46	1670.76
mmu-miR-674-3p	3564	1	756	1	0	281	927	565	2922.48	1.18	718.2	1.11	0	753.08	1279.26	864.45
mmu-miR-129-2	3381	0	95	0	0	0	64	21	2772.42	0	90.25	0	0	0	88.32	32.13
mmu-miR-378	3140	8	3109	5	1	755	6117	458	2574.8	9.44	2953.55	5.55	1.64	2023.4	8441.46	700.74
mmu-miR-342	3052	12	1999	4	1	2	975	523	2502.64	14.16	1899.05	4.44	1.64	5.36	1345.5	800.19
mmu-miR-101b	2996	2	1353	0	1	633	2449	611	2456.72	2.36	1285.35	0	1.64	1696.44	3379.62	934.83
mmu-miR-152	2919	4	430	0	0	4	827	316	2393.58	4.72	408.5	0	0	10.72	1141.26	483.48
mmu-miR-130b-3p	2886	2	315	1	1	200	505	349	2366.52	2.36	299.25	1.11	1.64	536	696.9	533.97
mmu-miR-206	2799	6	845	103	2	276	1106	1236	2295.18	7.08	802.75	114.33	3.28	739.68	1526.28	1891.08
mmu-miR-128-1,mmu-miR-128-2	2760	6	619	3	1	93	1292	322	2263.2	7.08	588.05	3.33	1.64	249.24	1782.96	492.66
mmu-miR-500	2650	4	671	2	0	334	986	1007	2173	4.72	637.45	2.22	0	895.12	1360.68	1540.71
mmu-miR-669f-3p	2593	52	1320	3	0	295	1155	145	2126.26	61.36	1254	3.33	0	790.6	1593.9	221.85
mmu-miR-92a-2	1960	3	1316	0	7	3	4241	749	1607.2	3.54	1250.2	0	11.48	8.04	5852.58	1145.97
mmu-miR-466d-3p	1922	3	710	1	0	114	243	325	1576.04	3.54	674.5	1.11	0	305.52	335.34	497.25
mmu-miR-676-3p	1762	2	211	1	0	115	242	116	1444.84	2.36	200.45	1.11	0	308.2	333.96	177.48
mmu-miR-34b-3p	1749	0	143	1	0	0	2	220	1434.18	0	135.85	1.11	0	0	2.76	336.6
mmu-miR-365-2,mmu-miR-365-1	1683	1	1190	0	0	137	1785	456	1380.06	1.18	1130.5	0	0	367.16	2463.3	697.68
mmu-miR-103-1,mmu-miR-103-2	1680	4	835	2	0	11	1513	82	1377.6	4.72	793.25	2.22	0	29.48	2087.94	125.46
mmu-miR-466b-3-3p,mmu-miR-466b-6-3p,mmu-miR-466b-4-3p,mmu-miR-466p-3p,mmu-miR-466a-3p,mmu-miR-466b-2-3p,mmu-miR-466c-1-3p,mmu-miR-466b-9-3p,mmu-miR-466b-1-3p,mmu-miR-466e-3p,mmu-miR-466b-7-3p,mmu-miR-466b-8-3p,mmu-miR-466b-5-3p,mmu-miR-466c-2-3p,mmu-miR-466c-3p	1340	2	672	1	0	30	228	222	1098.8	2.36	638.4	1.11	0	80.4	314.64	339.66
mmu-miR-532-3p	1326	2	359	7	1	110	496	405	1087.32	2.36	341.05	7.77	1.64	294.8	684.48	619.65
mmu-miR-1964-3p	1193	37	326	2	2	1	467	98	978.26	43.66	309.7	2.22	3.28	2.68	644.46	149.94
mmu-miR-19a	1161	3	641	0	5	423	1357	224	952.02	3.54	608.95	0	8.2	1133.64	1872.66	342.72
mmu-miR-148b	1084	8	788	1	0	355	1320	488	888.88	9.44	748.6	1.11	0	951.4	1821.6	746.64
mmu-miR-92b	972	0	378	1	0	124	299	148	797.04	0	359.1	1.11	0	332.32	412.62	226.44
mmu-miR-455-3p	954	0	38	0	0	0	0	0	782.28	0	36.1	0	0	0	0	0
mmu-miR-350	952	4	334	111	0	126	997	514	780.64	4.72	317.3	123.21	0	337.68	1375.86	786.42
mmu-miR-301a	812	3	463	0	1	80	837	0	665.84	3.54	439.85	0	1.64	214.4	1155.06	0
mmu-miR-452-3p	734	0	153	0	1	0	733	0	601.88	0	145.35	0	1.64	0	1011.54	0
mmu-miR-210	664	1	82	4	1	195	244	163	544.48	1.18	77.9	4.44	1.64	522.6	336.72	249.39
mmu-miR-101a	663	4	156	0	0	3	239	6	543.66	4.72	148.2	0	0	8.04	329.82	9.18
mmu-miR-107	449	0	143	3	0	0	69	21	368.18	0	135.85	3.33	0	0	95.22	32.13
mmu-miR-132-3p	415	3	415	3	0	5	551	622	340.3	3.54	394.25	3.33	0	13.4	760.38	951.66
mmu-miR-501-3p	394	1	436	0	0	157	1068	62	323.08	1.18	414.2	0	0	420.76	1473.84	94.86
mmu-miR-29c	394	0	169	2	0	114	178	244	323.08	0	160.55	2.22	0	305.52	245.64	373.32
mmu-miR-362-3p	385	0	102	0	1	0	199	40	315.7	0	96.9	0	1.64	0	274.62	61.2
mmu-miR-326	337	0	29	0	0	1	195	67	276.34	0	27.55	0	0	2.68	269.1	102.51
mmu-miR-297a-4-3p,mmu-miR-297c-3p,mmu-miR-297a-3-3p,mmu-miR-297b-3p	335	0	92	0	0	1	1	133	274.7	0	87.4	0	0	2.68	1.38	203.49
mmu-miR-187	203	0	200	1	1	1	382	0	166.46	0	190	1.11	1.64	2.68	527.16	0
mmu-miR-466m-3p	176	0	1	0	0	0	0	0	144.32	0	0.95	0	0	0	0	0
mmu-miR-664-3p	176	0	295	0	0	116	61	117	144.32	0	280.25	0	0	310.88	84.18	179.01
mmu-miR-466n-3p	166	0	86	4	0	1	104	0	136.12	0	81.7	4.44	0	2.68	143.52	0
mmu-miR-542	160	0	33	0	0	0	0	0	131.2	0	31.35	0	0	0	0	0
mmu-miR-421	158	0	391	0	0	0	121	1	129.56	0	371.45	0	0	0	166.98	1.53
mmu-miR-1982	155	0	85	0	0	0	0	0	127.1	0	80.75	0	0	0	0	0
mmu-miR-296-3p	137	2	0	0	0	0	0	0	112.34	2.36	0	0	0	0	0	0
mmu-miR-3084	113	0	27	0	0	0	0	0	92.66	0	25.65	0	0	0	0	0
mmu-miR-3102.1	99	0	0	0	0	0	0	0	81.18	0	0	0	0	0	0	0
mmu-miR-3095-3p	96	0	20	0	0	0	0	0	78.72	0	19	0	0	0	0	0
mmu-miR-700-3p	95	0	0	0	0	0	96	0	77.9	0	0	0	0	0	132.48	0
mmu-miR-212-3p	92	0	0	0	0	0	0	79	75.44	0	0	0	0	0	0	120.87
mmu-miR-3098-3p	78	0	0	0	0	1	60	69	63.96	0	0	0	0	2.68	82.8	105.57
mmu-miR-877-3p	64	0	160	0	0	0	139	104	52.48	0	152	0	0	0	191.82	159.12
mmu-miR-450b-3p	61	0	0	0	0	2	87	0	50.02	0	0	0	0	5.36	120.06	0
mmu-miR-344-1,mmu-miR-344-2	55	0	135	0	0	0	0	0	45.1	0	128.25	0	0	0	0	0
mmu-miR-1981-3p	53	0	26	0	0	0	64	0	43.46	0	24.7	0	0	0	88.32	0
mmu-miR-466l-3p	52	0	0	0	0	0	0	0	42.64	0	0	0	0	0	0	0
mmu-miR-297a-5-3p	49	0	24	0	0	0	0	0	40.18	0	22.8	0	0	0	0	0
mmu-miR-450a-2-3p	49	0	0	0	0	0	0	82	40.18	0	0	0	0	0	0	125.46
mmu-miR-669a-1-3p	48	0	38	0	1	1	149	2	39.36	0	36.1	0	1.64	2.68	205.62	3.06
mmu-miR-3089-3p	43	0	0	0	0	0	64	0	35.26	0	0	0	0	0	88.32	0
mmu-miR-331	42	0	0	0	0	0	0	0	34.44	0	0	0	0	0	0	0
mmu-miR-1-2-as	28	0	0	0	0	0	0	0	22.96	0	0	0	0	0	0	0
mmu-miR-1189	23	0	83	1	0	43	245	87	18.86	0	78.85	1.11	0	115.24	338.1	133.11
mmu-miR-142-3p	17	0	0	0	0	146	0	0	13.94	0	0	0	0	391.28	0	0
mmu-miR-129-1-3p	2	0	0	0	0	0	0	0	1.64	0	0	0	0	0	0	0
mmu-miR-294	0	0	319	1	1	185	240	61	0	0	303.05	1.11	1.64	495.8	331.2	93.33
mmu-miR-1198-3p	0	0	74	3	0	485	80	50	0	0	70.3	3.33	0	1299.8	110.4	76.5
mmu-miR-295	0	0	47	0	0	0	0	0	0	0	44.65	0	0	0	0	0
mmu-miR-338-3p	0	0	31	0	0	0	0	0	0	0	29.45	0	0	0	0	0
mmu-miR-3074-1-3p	0	0	0	0	0	0	116	0	0	0	0	0	0	0	160.08	0
mmu-miR-1955-3p	0	0	31	0	0	0	0	0	0	0	29.45	0	0	0	0	0
mmu-miR-3061-3p	0	0	20	0	0	0	0	0	0	0	19	0	0	0	0	0
mmu-miR-760-3p	0	0	42	0	0	0	0	0	0	0	39.9	0	0	0	0	0
mmu-miR-200a	0	0	27	0	0	0	85	0	0	0	25.65	0	0	0	117.3	0
mmu-miR-3096-3p	0	0	7	0	0	0	0	0	0	0	6.65	0	0	0	0	0
mmu-miR-3076-3p	0	0	32	0	0	0	0	0	0	0	30.4	0	0	0	0	0
mmu-miR-670-3p	0	0	39	0	0	0	0	0	0	0	37.05	0	0	0	0	0
mmu-miR-881	0	0	42	0	0	0	0	0	0	0	39.9	0	0	0	0	0
mmu-miR-133a.1	0	0	0	0	0	0	57	0	0	0	0	0	0	0	78.66	0
mmu-miR-300	0	0	42	0	0	0	0	0	0	0	39.9	0	0	0	0	0
mmu-miR-3086-3p	0	0	40	0	0	0	0	0	0	0	38	0	0	0	0	0
mmu-miR-1941-3p	0	0	67	0	0	0	0	0	0	0	63.65	0	0	0	0	0
TOTAL:	5033788	16169	1735482	14338	2900	405447	2113174	721485	4.12771e+06	19079.4	1.64871e+06	15915.2	4756	1.0866e+06	2.91618e+06	1.10387e+06

## Sheet: Normalization factors
	Calculation of normalization factor for Library X:
			("Mapped to mm9 (U01 + R01)" for WT + mCherry, replicate 1) / ("Mapped to mm9 (U01 + R01)" for Library X)
	NORMALIZATION FACTORS:
		WT	KO
		mCherry	mCherry	hsDicer	IIIA/IIIB (D1320A/D1709A)	RNase IIIA (D1320A)	RNase IIIB (D1709A)	Helicase (K70A)	PAZ (YY971AA)
	Replicate 1	1	2.04093	1.22733	1.35343	1.72022	1.98893	1.19989	0.995675
	Replicate 2	0.815721	1.18449	0.945536	1.107	1.64409	2.68147	1.38441	1.53492
